# Supplementary material for: A framework for integrating cement carbonation sink into national greenhouse gas inventories
Source: Research Square preprint supplement (doi:10.21203/rs.3.rs-8587414/v1), 2026-01-29
Supplement: Supplementary file 1 [file 3aacf51c719b86b5a39012ef.xlsx]

## Sheet: Index
Supplementary Table1: Activity Data
Data 1: Activity data used in this study
Data1.1: Clinker production from 1928 to 2024 in 50 countries and regions used in this study
Data1.2: Cement consumption (Corrected by clinker fraction) from 1928 to 2024 in 50 countries and regions used in this study
Data2: Cement production from 1928 to 2024 in 50 coubtries and regions
Data3: Cement import from 1928 to 2024 in 50 coubtries and regions
Data4: Cement export from 1928 to 2024 in 50 coubtries and regions
Data5: Clinker production from 1928 to 2024 in 50 coubtries and regions
Data6: Clinker import from 1928 to 2024 in 50 coubtries and regions
Data7: Clinker export from 1928 to 2024 in 50 coubtries and regions

## Sheet: Data1.1
Data 1: Activity data used in this study
Data1.1: Clinker production from 1928 to 2024 in 50 countries and regions used in this study
Unit: kt
Countires	ISO	1928	1929	1930	1931	1932	1933	1934	1935	1936	1937	1938	1939	1940	1941	1942	1943	1944	1945	1946	1947	1948	1949	1950	1951	1952	1953	1954	1955	1956	1957	1958	1959	1960	1961	1962	1963	1964	1965	1966	1967	1968	1969	1970	1971	1972	1973	1974	1975
Australia	AUS	726.433	684.523	670.553	377.186	237.488	307.337	398.141	530.855	621.659	698.404	342.306	649.598	670.469	656.583	537.84	377.147	419.096	670.553	698.493	852.161	977.89	1019.8	1215.38	1173.47	1292.21	1515.82	1816.08	1892.92	2032.61	2207.24	2332.97	2486.63	2654.27	2717.25	2786.99	2961.61	3443.45	3611.21	3492.46	3632.16	3729.95	4093.17	4281.65	4349.3	4476.12	4650.66	4500.32	4227.89
Austria	AUT	496.016	551.726	572.764	286.382	335.277	265.359	293.367	349.246	349.246	405.223	615.063	705.07	775.327	802.898	649.598	733.418	0	0	370.308	265.427	684.625	1033.91	1222.36	1404.19	1320.15	1327.14	1543.67	1767.19	1837.27	2025.63	2046.58	2298.04	2689.2	2926.69	2906.04	3143.22	3583.61	3841.71	4275.18	4316.69	4324.05	4331.01	4568.47	5217.37	6027.99	5944.17	6111.81	5350.46
Belarus	BLR	40.5692	50.1809	64.9203	69.4924	73.2501	57.4508	74.9406	95.183	124.686	116.293	121.441	121.468	123.83	123.997	0	0	0	38.7115	73.0969	103.455	142.461	172.834	227.307	268.545	305.905	346.717	413.064	489.673	542.112	630.973	728.266	849.155	997.924	1116.42	1259.94	1342.83	1430.96	1597.36	1767.43	1875.15	1938.68	1991.93	2115.54	2220.03	2299.01	2404.09	2517.87	2657.98
Belgium	BEL	2891.88	3087.34	2898.63	2340.05	1997.69	1851.01	1802.11	2088.49	2235.18	2856.84	2898.88	2423.77	202.563	600.704	481.989	440.051	572.701	614.674	1795.13	2479.65	3164.17	2779.88	3380.71	4176.99	3904.58	4393.52	4156.03	4456.21	4428.44	4470.52	3855.68	4218.9	4170.17	4519.25	4547.02	4470.2	5553.02	5608.9	5503.93	5525.08	5455.23	5957.97	6391.21	6522.19	6601.57	6494.5	6818.46	6217.28
Bulgaria	BGR	104.774	146.684	167.638	97.789	132.714	111.933	111.591	97.789	104.774	125.729	167.832	167.815	0	0	0	0	118.744	230.503	0	0	307.337	0	573.044	600.435	642.613	663.568	740.402	768.342	817.006	838.191	887.086	1362.06	1508.99	1662.41	1795.13	2095.48	2451.71	2549.7	2710.15	3185.34	3338.59	3373.72	3485.27	3667.94	3675.46	3902.34	3990.24	4029.15
Canada	CAN	1669.4	1850.94	1781.09	1536.68	698.529	363.216	523.894	523.87	747.387	928.996	831.207	866.165	1138.58	1264.27	1376.07	1103.59	1082.69	1278.24	1746.19	1802.11	2130.45	2402.75	2521.62	2563.41	2793.97	3352.69	3380.71	3792.82	4330.66	5210.76	5301.56	5413.32	4987.24	5350.46	5930.2	6041.96	6817.29	7201.46	7690.41	6887.14	7033.91	7110.66	6845.23	7794.86	8551.56	9512.01	9748.35	9335.87
Croatia	HRV	744.551	0	0	832.506	576.987	561.516	602.658	714.235	552.388	585.589	930.636	897.741	0	0	0	116.415	0	194.583	801.515	1491.52	1515.52	1613.88	921.941	872.099	1087.27	851.319	980.725	1156.62	1170.12	1414.09	1354.35	1499.76	1544.6	1535.37	1572.86	1718.73	1763.02	1561.34	1457.19	1238.73	1279.38	1269.28	1387.36	1617.18	1859.31	1677.68	1773.68	1938.35
Cyprus	CYP	0	0	0	0	0	0	0	0	0	0	0	0	0	0	0	0	0	0	0	0	0	0	0	0	0	0	0	0	34.9246	62.8644	76.4683	76.8342	83.8191	90.8041	90.8041	90.8041	69.8493	90.8041	90.8041	174.623	223.518	230.503	251.457	286.382	398.141	426.081	321.307	579.749
Czechia	CZE	0	0	752.658	752.537	678.662	535.477	563.255	600.186	660.161	854.11	0	175.185	133.695	189.035	202.862	221.3	0	0	576.822	881.655	1034.14	1089.58	1180.76	1310.58	1394.71	1464.64	1613.62	1822.43	1985.72	2323.49	2607.93	2988.2	3213.74	3402.13	3635.91	3292.26	3497.94	3640.99	3912.8	4133.31	4160.35	4326.93	4762.37	4991.4	4918.48	4995.4	5199.13	5242.74
Denmark	DNK	740.402	761.357	740.402	481.96	391.263	523.87	733.418	719.448	754.197	642.613	607.689	663.568	419.096	398.141	412.111	607.689	614.674	209.548	474.975	600.704	733.26	789.468	831.207	935.98	1152.7	1194.42	1159.5	1194.42	1124.57	1103.62	1012.95	1320.34	1368.88	1501.76	1550.5	1445.88	1801.96	1892.92	1990.7	2088.49	2165.33	2479.65	2472.81	2564.85	2660.59	2638.77	2245.62	1986.36
Estonia	EST	10.6288	13.147	17.0086	18.2064	19.1909	15.0516	19.6338	24.9372	32.6668	30.4678	31.8166	31.8236	32.4424	32.4863	0	0	0	10.1421	19.1508	27.1044	37.3237	45.2812	59.5526	70.3567	80.1447	90.8371	108.219	128.29	142.029	165.31	190.8	222.472	261.448	292.492	330.094	351.811	374.9	418.494	463.053	491.275	507.919	521.87	554.254	581.629	602.323	629.853	659.662	696.37
Finland	FIN	265.427	265.427	195.308	153.668	146.506	153.843	216.533	258.173	314.322	390.945	454.02	537.435	286.382	293.367	167.638	223.725	167.638	263.919	314.322	398.141	530.855	621.659	705.873	789.66	740.089	887.516	984.481	991.86	915.026	901.056	880.101	1110.6	1194.42	1278.56	1291.93	1355.08	1494.77	1683.37	1494.77	1438.9	1403.82	1704.32	1781.32	1746.53	1886.58	1991.73	2096.91	1964.6
France	FRA	4030.3	5497.14	4742.77	4658.95	4777.6	4421.46	4631.01	4183.89	4407.41	4044.27	0	0	0	3234.02	2374.88	2780.08	1410.96	1494.77	2011.61	3660.18	5112.87	6118.8	6845.35	7718.35	8214.28	8842.92	9255.03	10086.2	10868.5	11979.2	12740.5	13299.3	13466.9	14612.7	16037.4	17224.8	20459.1	21248.2	22135.2	23162	24119	26165.5	27555.8	27380.5	28168.3	28796.6	30187.2	27498.1
Germany	DEU	7327.19	6845.23	5385.38	3646.1	2745.08	3736.94	6146.74	8367.94	11106	11972.2	14822	13257.4	10205	10777.8	6922.06	8619.45	0	0	2465.68	2919.7	6181.66	9185.18	11860.4	13376.3	14347	17204	18223.7	20361.2	21346	21492.5	22079.5	25998	28435.8	30796.4	32326.1	32933.9	37425.4	38207.6	39122.7	36922.3	38941.1	40365.9	43991.1	46553	48446.9	46639.2	42071.2	39912.6
Greece	GRC	139.699	146.684	167.854	188.593	188.593	188.894	237.488	258.768	265.427	272.412	292.989	328.292	181.608	62.8644	28.3977	0	0	48.8945	97.789	174.623	264.71	314.322	377.186	411.781	565.348	706.007	810.252	1075.68	1174.15	1166.48	1271.26	1369.05	1558.25	1746.23	1829.39	2179.3	2535.53	3052.41	3408.65	3275.93	3876.64	4596.08	4603.07	5232.1	5902.64	6070.78	6530.19	7345.47
Hungary	HUN	405.126	384.171	314.322	279.489	188.593	174.559	216.533	265.427	202.563	370.301	377.186	0	0	635.629	691.508	663.695	146.684	34.9403	153.721	195.63	286.382	523.87	761.357	901.056	1005.83	1005.71	901.153	1117.59	942.861	942.965	1236.33	1361.94	1494.9	1522.6	1648.32	1711.42	2144.25	2263.12	2472.66	2521.4	2661.42	2437.74	2633.32	2557.69	2778.53	3159.69	3162	3432.58
Iceland	ISL	0	0	0	0	0	0	0	0	0	0	0	0	0	0	0	0	0	0	0	0	0	0	0	0	0	0	0	0	0	0	27.9397	76.8342	69.6389	69.8493	90.8041	91.0599	105.068	104.774	111.759	112.043	97.5647	90.8041	83.5986	110.818	123.307	122.297	141.743	147.198
Ireland	IRL	0	0	0	0	0	0	0	0	0	0	104.774	244.473	258.442	279.397	188.692	237.488	209.548	181.608	286.382	279.281	377.186	412.111	418.938	405.126	440.051	447.035	566.007	635.629	677.765	495.93	495.93	593.719	705.247	565.779	719.448	761.357	922.011	998.845	1054.47	1229.35	1285.49	1208.39	817.237	1427.77	1402.56	1503.72	1471.5	1495.57
Italy	ITA	2919.7	3324.83	3310.86	2919.7	2968.59	3374.13	3869.65	4009.35	3632.58	4142.06	4379.19	4854.53	4561.16	2654.5	2130.22	1626.65	1283.91	1083.58	1920.86	2618.83	2989.24	3835.08	4756.32	5301.56	6321.36	7438.95	8318.58	10128.1	10770.8	11350.5	12182.2	13683.5	15213.2	17127	19159.7	20982.3	21695.6	19655.6	21297	24942.8	27988.6	29776.8	31418.2	29883.3	31101.2	33372.8	33000.4	30764.3
Japan	JPN	3646.13	4058.24	3562.31	3436.42	3541.36	4547.19	4428.61	5580.96	5923.03	5734.46	5245.54	4819.46	4037.29	5538.92	4134.98	3576.37	2814.85	1110.6	880.101	1173.47	1767.19	3115.28	4239.85	6223.57	6761.22	8326.04	10142.1	10037.3	12370.3	14416.6	14235.3	16400.6	21408.8	23399.8	27346	28449.6	31327.1	31055	36349.9	40819.6	45290	48817.4	54328.8	56399.5	62843.5	73973.7	69158.6	64736
Kazakhstan	KAZ	112.769	139.486	180.457	193.166	203.611	159.694	208.31	264.577	346.587	323.256	337.566	337.641	344.206	344.671	0	0	0	107.605	203.185	287.571	395.995	480.422	631.839	746.467	850.315	963.76	1148.18	1361.13	1506.89	1753.9	2024.34	2360.37	2773.9	3103.27	3502.22	3732.63	3977.6	4440.12	4912.88	5212.31	5388.9	5536.91	5880.5	6170.95	6390.5	6682.58	6998.86	7388.31
Latvia	LVA	6.99946	8.65777	11.2008	11.9896	12.6379	9.91205	12.9296	16.422	21.5123	20.0642	20.9524	20.957	21.3645	21.3934	0	0	0	6.67895	12.6115	17.8493	24.579	29.8193	39.2176	46.3324	52.7782	59.8196	71.2663	84.4838	93.5312	108.862	125.649	146.506	172.173	192.617	217.379	231.681	246.885	275.594	304.937	323.523	334.483	343.671	364.996	383.024	396.652	414.781	434.412	458.585
Lithuania	LTU	26.438	32.7017	42.307	45.2866	47.7354	37.4393	48.837	62.0285	81.2552	75.7855	79.1404	79.1579	80.697	80.8061	0	0	0	25.2274	47.6356	67.4194	92.8387	112.632	148.131	175.005	199.351	225.948	269.184	319.108	353.281	411.19	474.594	553.375	650.324	727.542	821.075	875.093	932.524	1040.96	1151.79	1221.99	1263.39	1298.1	1378.65	1446.74	1498.21	1566.69	1640.84	1732.14
Luxembourg	LUX	0	0	0	0	0	0	0	0	0	0	0	0	0	0	0	0	0	48.8945	69.8493	83.8191	97.789	111.759	125.729	125.729	104.815	139.699	146.684	146.738	153.668	181.67	188.593	181.608	202.563	216.533	216.533	195.578	195.52	209.548	202.499	174.623	181.554	195.578	230.503	251.457	293.367	342.173	349.246	328.292
Netherlands	NLD	0	202.545	209.548	188.608	244.451	342.262	377.186	342.262	384.171	419.096	433.066	516.885	0	440.007	349.246	342.262	202.563	216.533	384.171	495.971	558.751	523.87	565.779	663.568	775.275	817.237	922.011	1047.68	1194.42	1257.36	1299.2	1522.71	1711.31	1809.1	1913.87	1976.81	2731.11	2821.91	3003.52	3178.14	3261.96	3129.25	3639.05	3691.37	3521.71	3415.33	3275.68	2831.55
New Zealand	NZL	195.426	188.593	181.608	146.557	139.699	167.465	0	118.639	146.684	167.638	209.548	223.518	209.387	209.394	209.397	216.533	216.533	223.664	216.533	209.548	237.33	244.313	244.473	153.737	251.457	265.314	307.337	391.156	426.081	509.9	530.855	530.855	586.734	621.659	600.704	684.523	747.387	803.482	831.207	775.327	726.235	761.357	789.297	782.122	852.161	1005.63	1054.52	1019.8
Norway	NOR	301.831	303.291	305.408	209.164	223.613	211.293	237.488	251.457	286.382	307.241	314.432	370.201	321.307	300.352	356.514	293.367	307.106	132.714	412.111	447.035	502.747	565.779	551.809	663.312	670.3	719.717	733.418	761.357	852.161	963.92	977.89	1075.68	1096.63	1208.39	1341.11	1369.05	1466.84	1522.71	1732.26	2046.58	2179.3	2367.89	2479.97	2599.2	2578.42	2571.93	2482.45	2545.14
Poland	POL	1040.75	956.935	789.297	516.885	335.277	391.156	684.523	803.267	998.771	1222.36	1634.57	0	0	0	0	0	0	286.364	1327.14	1445.88	1732.26	2228.11	2388.92	2556.56	2535.53	3129.25	3233.94	3625.09	3834.73	4267.79	4805.53	5050.1	6265.48	6991.91	7166.54	7292.15	8319.18	9094.38	9541.41	10575.2	11022.4	11238.6	11567.2	12202.4	12806.8	13974.9	14778.5	15991.5
Portugal	PRT	69.8493	83.8191	90.8811	90.8041	111.759	153.668	174.78	202.563	230.503	244.291	251.457	279.397	258.442	258.442	230.503	237.192	230.763	251.457	307.337	405.126	474.975	495.93	544.824	608.102	691.508	733.418	740.402	739.983	970.905	928.996	970.905	977.89	1138.54	1180.45	1334.12	1362.06	1543.16	1592.56	1634.47	1732.26	1767.19	1935.31	2214.75	2332.97	2640.3	3136.23	3220.62	3275.93
Romania	ROU	314.385	300.352	377.186	188.62	202.563	209.548	300.352	363.216	356.231	433.066	426.022	502.915	377.186	586.639	349.246	433.066	307.412	237.488	300.289	398.141	426.081	530.855	614.558	1082.84	1424.93	1802.33	1522.71	1837.22	1990.7	2235.18	2444.9	2710.15	2898.75	3143.22	3310.86	4148.83	4512.26	5133.92	5587.94	6014.02	6677.59	7138.83	7718.11	7965.78	8472.07	8903.92	9950.73	10069.8
Russia	RUS	1127.58	1398.38	1828.63	1957.28	2047.94	1601.15	2085.32	2644.69	3460.72	3228.74	3372.25	3372.61	3430.44	3427.34	0	0	0	1060.41	1997.81	2821.19	3876.14	4691.99	6156.94	7257.63	8248.77	9328.33	11088.5	13115.6	14487.6	16824.7	19375.5	22541.3	26431.3	29503.6	33222.3	35329	37563.6	41838.1	46189.5	48895.5	50439.5	51709.5	54796	57109.7	58738.7	61005.9	63460.1	66538.3
Slovakia	SVK	0	0	424.95	425.404	383.513	302.942	318.415	339.301	373.16	482.625	0	99.7182	76.1194	107.574	115.457	125.962	0	0	326.878	498.652	584.437	615.639	657.037	728.797	773.358	811.088	891.695	1006.64	1093.66	1256.59	1396.68	1581.59	1698.14	1794.34	1918.18	1742.06	1839.1	1907.86	2037.94	2117.49	2122.67	2180.35	2386.38	2522.83	2510.94	2567.42	2698.98	2761.19
Slovenia	SVN	141.032	0	0	156.062	114.361	111.776	116.247	137.101	110.328	107.892	130.509	121.529	0	0	0	88.3377	0	24.3146	107.757	224.243	217.111	233.895	205.693	195.526	225.765	211.027	231.611	263.428	261.562	331.619	327.019	366.921	392.179	384.09	408.963	459.581	486.418	481.345	487.492	472.212	521.575	539.401	594.882	674.562	780.711	790.813	824.682	878.937
Spain	ESP	1466.84	1732.26	1745.96	1550.65	1355.08	1334.12	1292.21	1285.23	572.504	363.216	565.779	1131.56	1480.8	1557.64	1564.62	1613.52	1752.97	1830.05	2039.6	2074.52	2214.22	2137.17	2396.1	2605.67	2814.93	3094.61	3618.53	4114.12	4491.31	4721.81	5057.09	5441.26	5448.24	6293.85	6929.05	7362.11	8074.58	9206.14	11469.3	12796.4	14207.9	15499	15862.3	16283.3	18548.9	21171.8	21021.2	22753
Sweden	SWE	444.591	541.403	580.638	491.712	459.431	382.52	551.809	705.478	754.372	831.207	942.965	1124.57	663.568	614.524	782.312	879.897	1005.83	1153.44	1390	1473.82	1410.96	1613.52	1850.77	1934.83	2011.66	2235.18	2339.95	2424	2367.89	2325.98	2382.07	2682.21	2668.24	2891.54	2919.7	3136.44	3443.57	3583.06	3569.12	3702.01	3715.98	3757.89	3869.65	3759.92	3698.76	4031.23	3173.59	2997.34
Switzerland	CHE	600.704	656.583	747.674	810.252	761.357	0	0	0	481.96	0	614.674	0	614.674	677.164	418.833	349.454	405.126	391.156	656.583	908.041	970.905	928.996	1027.15	1250.67	1312.74	1501.76	1724.78	2011.66	2263.12	2381.86	2074.52	2549.5	2884.78	3422.62	3541.36	3401.66	4107.14	3834.26	4107.62	3967.89	4107.14	4309.29	4554.59	4941.95	5389.31	5411.8	4917.45	3513.72
Turkey	TUR	55.8794	62.8644	55.8794	97.6981	104.678	111.759	160.653	125.729	132.714	202.563	251.656	272.412	251.626	258.611	202.563	160.653	272.412	272.412	307.337	335.112	328.292	356.231	377.332	377.051	433.066	502.915	670.736	782.522	922.011	1201.41	1439.22	1648.09	1934.83	1927.84	2207.24	2563.47	2793.97	3163.75	3674.07	4036.85	4490.86	5503.6	6055.93	7124.83	7911.01	8352.24	8289.12	9860.54
Ukraine	UKR	291.56	368.7	510.243	547.3	552.705	424.473	547.425	687.341	893.661	836.241	873.765	873.122	889.394	889.894	0	0	0	276.95	522.541	738.984	1016.81	1232.64	1619.88	1912.27	2176.62	2465.11	2934.56	3476.15	3845.46	4472.37	5158.04	6009.66	7057.16	7889.11	8896.58	9474.7	10088.9	11253.5	12442.4	13190.8	13627.4	13991.3	14848.4	15517.3	16003.2	16666.1	17383.8	18276.7
United Kingdom	GBR	4176.99	4526.23	4854.49	5685.73	4107.1	4246.84	5015.18	5748.6	6363.32	6935.98	7501.87	0	0	6894.18	7005.88	6726.54	4400.54	3911.56	6349.3	6719.45	8221.26	8898.8	9415.75	9869.77	10749.7	10826.6	11546.1	12084	12321.4	11546.1	11259.7	12146.8	12824.3	13655.5	13536.8	13355.2	16114.3	16114.2	15932.6	16693.9	16980.5	16547.2	16205	16806.3	17128.1	18963.4	16870.9	16013.9
USA	USA	29631	28821	27457	20775	12792	10738	13261	12847	19123	19927	17757.2	20742.4	22195.8	27907	30915.3	23142.4	15436.3	17516.1	28162.4	31995.7	35396.8	36109	38678.5	42361	42774.1	45206	46377.8	51092.8	54564.8	51903.4	53349.5	58108.3	55348.7	55157.8	57425.1	60416.9	63473.9	63991	66447	64566	67883	68608	67122.6	68248.2	70196.5	70952.9	70740.1	58548.9
Mexico	MEX	202.563	216.533	0	0	0	0	0	237.488	272.458	328.292	356.285	391.156	460.933	509.9	558.686	551.703	579.749	705.478	698.593	949.95	1026.91	1166.34	1452.87	1536.68	1578.59	1585.58	1662.41	1913.87	2165.33	2430.94	2409.8	2570.45	2933.67	2884.78	3184.94	3576.09	4197.73	4085.98	4679.9	5315.31	5818.45	6446.86	6824.28	6934.34	8037.78	9067.28	9733.77	10575.4
Brazil	BRA	83.8191	90.8041	83.7635	160.653	139.699	209.548	307.337	349.014	460.677	544.824	587.087	663.977	705.478	726.433	712.018	712.06	768.342	733.418	781.928	866.131	1054.72	1214.77	1320.15	1383.02	1536.46	1927.56	2374.58	2633.03	3108.29	3227.04	3597.24	3646.13	4246.84	4477.67	4819.27	4924.37	5343.13	5336.83	5741.61	6083.87	6914.75	7431.96	7742.09	8430.27	9788.03	11521.9	12830.9	14394.2
Egypt	EGY	84.1743	167.638	285.359	230.503	230.503	272.412	279.397	363.216	321.307	314.322	356.231	355.646	342.262	398.141	398.141	307.337	404.786	412.111	558.794	614.674	726.433	845.176	970.905	1075.68	901.056	1040.75	1271.66	1299.2	1285.23	1390	1438.9	1697.34	1941.81	1956.2	2123.42	2381.86	2395.83	2297.74	2319	2612.36	2989.55	3430.24	3498.86	3710.62	3608.7	3404.03	3062.56	3347.95
Iran	IRN	0	0	0	0	0	0	0	0	0	0	0	0	62.8644	48.9031	48.9006	34.9246	34.9277	20.9548	41.907	41.9096	62.8644	55.8794	62.8644	62.8644	48.8945	62.9246	62.6446	125.729	209.548	300.301	391.156	551.809	754.298	705.549	705.478	705.415	705.478	747.438	1327.21	1327.14	1844.02	2228.19	2444.73	2704.45	3192.47	3296.89	4259.56	5045.32
Saudi Arabia	SAU	0	0	0	0	0	0	0	0	0	0	0	0	0	0	0	0	0	0	0	0	0	0	0	0	0	0	0	0	0	0	0	69.8493	83.8191	97.8895	174.623	188.494	244.473	237.488	237.488	307.337	481.899	558.794	642.561	669.918	913.244	912.424	1002.02	1063.63
India	IND	537.84	544.824	544.824	558.794	565.779	593.719	726.433	845.176	928.996	1082.66	0	0	0	2018.64	2109.45	2039.74	1969.89	2067.54	1871.96	1397.07	1501.76	2025.63	2521.56	3087.34	3415.46	3646.13	4246.84	4330.66	4756.74	5406.33	5874.12	6587.01	7452.92	7830.33	8158.19	8884.83	9206.36	10051.5	10498.3	11106	11343.5	12594.1	12866.2	14089	14837.3	14068.2	13333	15083.9
China	CHN	90.7943	174.623	167.638	223.518	181.608	258.42	223.518	356.254	977.89	998.905	20.9548	509.9	621.632	1131.56	1494.77	1459.85	1117.63	41.9065	195.578	398.098	188.622	627	1339.5	2365.5	2745.5	3686	4370	4275	6070.5	6517	8835	11656.5	14867.5	5899.5	5700	7657	11485.5	15523	19142.5	13889	11989	17375.5	24462.5	29499.5	32570	33667.1	32879.6	40274
South Korea	KOR	0	0	0	0	0	0	11.0288	23.1606	28.3237	33.1044	0	59.9419	0	65.4378	59.1881	69.8634	50.0069	6.98493	7.03785	14.0271	13.9699	20.9548	13.9465	6.98493	34.9246	41.9423	55.8794	55.8794	41.9096	90.8041	279.511	342.262	412.231	495.93	747.387	740.274	1180.26	1529.7	1788.14	2319.24	3394.68	4589.1	5532.44	6519.01	6137.88	7725.17	8341.62	9537.53
Vietnam	VNM	153.668	174.623	160.653	146.684	160.653	104.774	111.759	104.774	139.699	223.518	251.457	293.367	265.427	286.382	167.638	118.744	0	6.98493	34.9246	35.1056	90.8041	146.684	140.045	202.563	216.533	279.397	244.473	286.382	188.593	153.473	286.382	363.216	384.171	433.066	440.051	467.99	684.523	901.056	838.352	887.086	607.689	705.478	747.387	724.043	471.85	719.264	654.711	652.545
Indonesia	IDN	0	139.699	132.741	125.701	76.8342	69.8493	104.794	132.738	125.729	0	0	160.633	0	160.676	0	0	0	0	0	6.98493	34.9246	0	0	97.789	132.675	139.738	139.699	139.699	139.699	237.449	286.429	328.292	370.138	426.081	481.96	314.322	419.096	349.246	321.307	335.277	391.156	509.956	523.87	461.005	565.779	691.508	789.297	1019.8
The data for the period from 1928 to 1989 was obtained based on the clinker-to-cement ratio and cement production.
The data after 1990 are from UN Comtrade Database. https://comtradeplus.un.org/.
[truncated: 49 more columns]

## Sheet: Data1.2
Data 1: Activity data used in this study
Data1.2: Cement consumption (Corrected by clinker fraction) from 1928 to 2024 in 50 countries and regions used in this study
Unit: kt
Countires	ISO	1928	1929	1930	1931	1932	1933	1934	1935	1936	1937	1938	1939	1940	1941	1942	1943	1944	1945	1946	1947	1948	1949	1950	1951	1952	1953	1954	1955	1956	1957	1958	1959	1960	1961	1962	1963	1964	1965	1966	1967	1968	1969	1970	1971	1972	1973	1974	1975
Australia	AUS	726.433	684.523	670.553	377.186	237.488	307.337	398.141	530.855	621.659	698.404	342.306	649.598	670.469	656.583	537.84	377.147	419.096	670.553	698.493	852.161	977.89	1019.8	1215.38	1173.47	1292.21	1515.82	1816.08	1892.92	2032.61	2207.24	2332.97	2486.63	2654.27	2717.25	2786.99	2961.61	3443.45	3611.21	3492.46	3632.16	3729.95	4093.17	4281.65	4349.3	4476.12	4650.66	4500.32	4227.89
Austria	AUT	496.016	551.726	572.764	286.382	335.277	265.359	293.367	349.246	349.246	405.223	615.063	705.07	775.327	802.898	649.598	733.418	0	0	370.308	265.427	684.625	1033.91	1222.36	1404.19	1320.15	1327.14	1543.67	1767.19	1837.27	2025.63	2046.58	2298.04	2689.2	2926.69	2906.04	3143.22	3583.61	3841.71	4275.18	4316.69	4324.05	4331.01	4568.47	5217.37	6027.99	5944.17	6111.81	5350.46
Belarus	BLR	40.5692	50.1809	64.9203	69.4924	73.2501	57.4508	74.9406	95.183	124.686	116.293	121.441	121.468	123.83	123.997	0	0	0	38.7115	73.0969	103.455	142.461	172.834	227.307	268.545	305.905	346.717	413.064	489.673	542.112	630.973	728.266	849.155	997.924	1116.42	1259.94	1342.83	1430.96	1597.36	1767.43	1875.15	1938.68	1991.93	2115.54	2220.03	2299.01	2404.09	2517.87	2657.98
Belgium	BEL	2891.88	3087.34	2898.63	2340.05	1997.69	1851.01	1802.11	2088.49	2235.18	2856.84	2898.88	2423.77	202.563	600.704	481.989	440.051	572.701	614.674	1795.13	2479.65	3164.17	2779.88	3380.71	4176.99	3904.58	4393.52	4156.03	4456.21	4428.44	4470.52	3855.68	4218.9	4170.17	4519.25	4547.02	4470.2	5553.02	5608.9	5503.93	5525.08	5455.23	5957.97	6391.21	6522.19	6601.57	6494.5	6818.46	6217.28
Bulgaria	BGR	104.774	146.684	167.638	97.789	132.714	111.933	111.591	97.789	104.774	125.729	167.832	167.815	0	0	0	0	118.744	230.503	0	0	307.337	0	573.044	600.435	642.613	663.568	740.402	768.342	817.006	838.191	887.086	1362.06	1508.99	1662.41	1795.13	2095.48	2451.71	2549.7	2710.15	3185.34	3338.59	3373.72	3485.27	3667.94	3675.46	3902.34	3990.24	4029.15
Canada	CAN	1669.4	1850.94	1781.09	1536.68	698.529	363.216	523.894	523.87	747.387	928.996	831.207	866.165	1138.58	1264.27	1376.07	1103.59	1082.69	1278.24	1746.19	1802.11	2130.45	2402.75	2521.62	2563.41	2793.97	3352.69	3380.71	3792.82	4330.66	5210.76	5301.56	5413.32	4987.24	5350.46	5930.2	6041.96	6817.29	7201.46	7690.41	6887.14	7033.91	7110.66	6845.23	7794.86	8551.56	9512.01	9748.35	9335.87
Croatia	HRV	744.551	0	0	832.506	576.987	561.516	602.658	714.235	552.388	585.589	930.636	897.741	0	0	0	116.415	0	194.583	801.515	1491.52	1515.52	1613.88	921.941	872.099	1087.27	851.319	980.725	1156.62	1170.12	1414.09	1354.35	1499.76	1544.6	1535.37	1572.86	1718.73	1763.02	1561.34	1457.19	1238.73	1279.38	1269.28	1387.36	1617.18	1859.31	1677.68	1773.68	1938.35
Cyprus	CYP	0	0	0	0	0	0	0	0	0	0	0	0	0	0	0	0	0	0	0	0	0	0	0	0	0	0	0	0	34.9246	62.8644	76.4683	76.8342	83.8191	90.8041	90.8041	90.8041	69.8493	90.8041	90.8041	174.623	223.518	230.503	251.457	286.382	398.141	426.081	321.307	579.749
Czechia	CZE	0	0	752.658	752.537	678.662	535.477	563.255	600.186	660.161	854.11	0	175.185	133.695	189.035	202.862	221.3	0	0	576.822	881.655	1034.14	1089.58	1180.76	1310.58	1394.71	1464.64	1613.62	1822.43	1985.72	2323.49	2607.93	2988.2	3213.74	3402.13	3635.91	3292.26	3497.94	3640.99	3912.8	4133.31	4160.35	4326.93	4762.37	4991.4	4918.48	4995.4	5199.13	5242.74
Denmark	DNK	740.402	761.357	740.402	481.96	391.263	523.87	733.418	719.448	754.197	642.613	607.689	663.568	419.096	398.141	412.111	607.689	614.674	209.548	474.975	600.704	733.26	789.468	831.207	935.98	1152.7	1194.42	1159.5	1194.42	1124.57	1103.62	1012.95	1320.34	1368.88	1501.76	1550.5	1445.88	1801.96	1892.92	1990.7	2088.49	2165.33	2479.65	2472.81	2564.85	2660.59	2638.77	2245.62	1986.36
Estonia	EST	10.6288	13.147	17.0086	18.2064	19.1909	15.0516	19.6338	24.9372	32.6668	30.4678	31.8166	31.8236	32.4424	32.4863	0	0	0	10.1421	19.1508	27.1044	37.3237	45.2812	59.5526	70.3567	80.1447	90.8371	108.219	128.29	142.029	165.31	190.8	222.472	261.448	292.492	330.094	351.811	374.9	418.494	463.053	491.275	507.919	521.87	554.254	581.629	602.323	629.853	659.662	696.37
Finland	FIN	265.427	265.427	195.308	153.668	146.506	153.843	216.533	258.173	314.322	390.945	454.02	537.435	286.382	293.367	167.638	223.725	167.638	263.919	314.322	398.141	530.855	621.659	705.873	789.66	740.089	887.516	984.481	991.86	915.026	901.056	880.101	1110.6	1194.42	1278.56	1291.93	1355.08	1494.77	1683.37	1494.77	1438.9	1403.82	1704.32	1781.32	1746.53	1886.58	1991.73	2096.91	1964.6
France	FRA	4030.3	5497.14	4742.77	4658.95	4777.6	4421.46	4631.01	4183.89	4407.41	4044.27	0	0	0	3234.02	2374.88	2780.08	1410.96	1494.77	2011.61	3660.18	5112.87	6118.8	6845.35	7718.35	8214.28	8842.92	9255.03	10086.2	10868.5	11979.2	12740.5	13299.3	13466.9	14612.7	16037.4	17224.8	20459.1	21248.2	22135.2	23162	24119	26165.5	27555.8	27380.5	28168.3	28796.6	30187.2	27498.1
Germany	DEU	7327.19	6845.23	5385.38	3646.1	2745.08	3736.94	6146.74	8367.94	11106	11972.2	14822	13257.4	10205	10777.8	6922.06	8619.45	0	0	2465.68	2919.7	6181.66	9185.18	11860.4	13376.3	14347	17204	18223.7	20361.2	21346	21492.5	22079.5	25998	28435.8	30796.4	32326.1	32933.9	37425.4	38207.6	39122.7	36922.3	38941.1	40365.9	43991.1	46553	48446.9	46639.2	42071.2	39912.6
Greece	GRC	139.699	146.684	167.854	188.593	188.593	188.894	237.488	258.768	265.427	272.412	292.989	328.292	181.608	62.8644	28.3977	0	0	48.8945	97.789	174.623	264.71	314.322	377.186	411.781	565.348	706.007	810.252	1075.68	1174.15	1166.48	1271.26	1369.05	1558.25	1746.23	1829.39	2179.3	2535.53	3052.41	3408.65	3275.93	3876.64	4596.08	4603.07	5232.1	5902.64	6070.78	6530.19	7345.47
Hungary	HUN	405.126	384.171	314.322	279.489	188.593	174.559	216.533	265.427	202.563	370.301	377.186	0	0	635.629	691.508	663.695	146.684	34.9403	153.721	195.63	286.382	523.87	761.357	901.056	1005.83	1005.71	901.153	1117.59	942.861	942.965	1236.33	1361.94	1494.9	1522.6	1648.32	1711.42	2144.25	2263.12	2472.66	2521.4	2661.42	2437.74	2633.32	2557.69	2778.53	3159.69	3162	3432.58
Iceland	ISL	0	0	0	0	0	0	0	0	0	0	0	0	0	0	0	0	0	0	0	0	0	0	0	0	0	0	0	0	0	0	27.9397	76.8342	69.6389	69.8493	90.8041	91.0599	105.068	104.774	111.759	112.043	97.5647	90.8041	83.5986	110.818	123.307	122.297	141.743	147.198
Ireland	IRL	0	0	0	0	0	0	0	0	0	0	104.774	244.473	258.442	279.397	188.692	237.488	209.548	181.608	286.382	279.281	377.186	412.111	418.938	405.126	440.051	447.035	566.007	635.629	677.765	495.93	495.93	593.719	705.247	565.779	719.448	761.357	922.011	998.845	1054.47	1229.35	1285.49	1208.39	817.237	1427.77	1402.56	1503.72	1471.5	1495.57
Italy	ITA	2919.7	3324.83	3310.86	2919.7	2968.59	3374.13	3869.65	4009.35	3632.58	4142.06	4379.19	4854.53	4561.16	2654.5	2130.22	1626.65	1283.91	1083.58	1920.86	2618.83	2989.24	3835.08	4756.32	5301.56	6321.36	7438.95	8318.58	10128.1	10770.8	11350.5	12182.2	13683.5	15213.2	17127	19159.7	20982.3	21695.6	19655.6	21297	24942.8	27988.6	29776.8	31418.2	29883.3	31101.2	33372.8	33000.4	30764.3
Japan	JPN	3646.13	4058.24	3562.31	3436.42	3541.36	4547.19	4428.61	5580.96	5923.03	5734.46	5245.54	4819.46	4037.29	5538.92	4134.98	3576.37	2814.85	1110.6	880.101	1173.47	1767.19	3115.28	4239.85	6223.57	6761.22	8326.04	10142.1	10037.3	12370.3	14416.6	14235.3	16400.6	21408.8	23399.8	27346	28449.6	31327.1	31055	36349.9	40819.6	45290	48817.4	54328.8	56399.5	62843.5	73973.7	69158.6	64736
Kazakhstan	KAZ	112.769	139.486	180.457	193.166	203.611	159.694	208.31	264.577	346.587	323.256	337.566	337.641	344.206	344.671	0	0	0	107.605	203.185	287.571	395.995	480.422	631.839	746.467	850.315	963.76	1148.18	1361.13	1506.89	1753.9	2024.34	2360.37	2773.9	3103.27	3502.22	3732.63	3977.6	4440.12	4912.88	5212.31	5388.9	5536.91	5880.5	6170.95	6390.5	6682.58	6998.86	7388.31
Latvia	LVA	6.99946	8.65777	11.2008	11.9896	12.6379	9.91205	12.9296	16.422	21.5123	20.0642	20.9524	20.957	21.3645	21.3934	0	0	0	6.67895	12.6115	17.8493	24.579	29.8193	39.2176	46.3324	52.7782	59.8196	71.2663	84.4838	93.5312	108.862	125.649	146.506	172.173	192.617	217.379	231.681	246.885	275.594	304.937	323.523	334.483	343.671	364.996	383.024	396.652	414.781	434.412	458.585
Lithuania	LTU	26.438	32.7017	42.307	45.2866	47.7354	37.4393	48.837	62.0285	81.2552	75.7855	79.1404	79.1579	80.697	80.8061	0	0	0	25.2274	47.6356	67.4194	92.8387	112.632	148.131	175.005	199.351	225.948	269.184	319.108	353.281	411.19	474.594	553.375	650.324	727.542	821.075	875.093	932.524	1040.96	1151.79	1221.99	1263.39	1298.1	1378.65	1446.74	1498.21	1566.69	1640.84	1732.14
Luxembourg	LUX	0	0	0	0	0	0	0	0	0	0	0	0	0	0	0	0	0	48.8945	69.8493	83.8191	97.789	111.759	125.729	125.729	104.815	139.699	146.684	146.738	153.668	181.67	188.593	181.608	202.563	216.533	216.533	195.578	195.52	209.548	202.499	174.623	181.554	195.578	230.503	251.457	293.367	342.173	349.246	328.292
Netherlands	NLD	0	202.545	209.548	188.608	244.451	342.262	377.186	342.262	384.171	419.096	433.066	516.885	0	440.007	349.246	342.262	202.563	216.533	384.171	495.971	558.751	523.87	565.779	663.568	775.275	817.237	922.011	1047.68	1194.42	1257.36	1299.2	1522.71	1711.31	1809.1	1913.87	1976.81	2731.11	2821.91	3003.52	3178.14	3261.96	3129.25	3639.05	3691.37	3521.71	3415.33	3275.68	2831.55
New Zealand	NZL	195.426	188.593	181.608	146.557	139.699	167.465	0	118.639	146.684	167.638	209.548	223.518	209.387	209.394	209.397	216.533	216.533	223.664	216.533	209.548	237.33	244.313	244.473	153.737	251.457	265.314	307.337	391.156	426.081	509.9	530.855	530.855	586.734	621.659	600.704	684.523	747.387	803.482	831.207	775.327	726.235	761.357	789.297	782.122	852.161	1005.63	1054.52	1019.8
Norway	NOR	301.831	303.291	305.408	209.164	223.613	211.293	237.488	251.457	286.382	307.241	314.432	370.201	321.307	300.352	356.514	293.367	307.106	132.714	412.111	447.035	502.747	565.779	551.809	663.312	670.3	719.717	733.418	761.357	852.161	963.92	977.89	1075.68	1096.63	1208.39	1341.11	1369.05	1466.84	1522.71	1732.26	2046.58	2179.3	2367.89	2479.97	2599.2	2578.42	2571.93	2482.45	2545.14
Poland	POL	1040.75	956.935	789.297	516.885	335.277	391.156	684.523	803.267	998.771	1222.36	1634.57	0	0	0	0	0	0	286.364	1327.14	1445.88	1732.26	2228.11	2388.92	2556.56	2535.53	3129.25	3233.94	3625.09	3834.73	4267.79	4805.53	5050.1	6265.48	6991.91	7166.54	7292.15	8319.18	9094.38	9541.41	10575.2	11022.4	11238.6	11567.2	12202.4	12806.8	13974.9	14778.5	15991.5
Portugal	PRT	69.8493	83.8191	90.8811	90.8041	111.759	153.668	174.78	202.563	230.503	244.291	251.457	279.397	258.442	258.442	230.503	237.192	230.763	251.457	307.337	405.126	474.975	495.93	544.824	608.102	691.508	733.418	740.402	739.983	970.905	928.996	970.905	977.89	1138.54	1180.45	1334.12	1362.06	1543.16	1592.56	1634.47	1732.26	1767.19	1935.31	2214.75	2332.97	2640.3	3136.23	3220.62	3275.93
Romania	ROU	314.385	300.352	377.186	188.62	202.563	209.548	300.352	363.216	356.231	433.066	426.022	502.915	377.186	586.639	349.246	433.066	307.412	237.488	300.289	398.141	426.081	530.855	614.558	1082.84	1424.93	1802.33	1522.71	1837.22	1990.7	2235.18	2444.9	2710.15	2898.75	3143.22	3310.86	4148.83	4512.26	5133.92	5587.94	6014.02	6677.59	7138.83	7718.11	7965.78	8472.07	8903.92	9950.73	10069.8
Russia	RUS	1127.58	1398.38	1828.63	1957.28	2047.94	1601.15	2085.32	2644.69	3460.72	3228.74	3372.25	3372.61	3430.44	3427.34	0	0	0	1060.41	1997.81	2821.19	3876.14	4691.99	6156.94	7257.63	8248.77	9328.33	11088.5	13115.6	14487.6	16824.7	19375.5	22541.3	26431.3	29503.6	33222.3	35329	37563.6	41838.1	46189.5	48895.5	50439.5	51709.5	54796	57109.7	58738.7	61005.9	63460.1	66538.3
Slovakia	SVK	0	0	424.95	425.404	383.513	302.942	318.415	339.301	373.16	482.625	0	99.7182	76.1194	107.574	115.457	125.962	0	0	326.878	498.652	584.437	615.639	657.037	728.797	773.358	811.088	891.695	1006.64	1093.66	1256.59	1396.68	1581.59	1698.14	1794.34	1918.18	1742.06	1839.1	1907.86	2037.94	2117.49	2122.67	2180.35	2386.38	2522.83	2510.94	2567.42	2698.98	2761.19
Slovenia	SVN	141.032	0	0	156.062	114.361	111.776	116.247	137.101	110.328	107.892	130.509	121.529	0	0	0	88.3377	0	24.3146	107.757	224.243	217.111	233.895	205.693	195.526	225.765	211.027	231.611	263.428	261.562	331.619	327.019	366.921	392.179	384.09	408.963	459.581	486.418	481.345	487.492	472.212	521.575	539.401	594.882	674.562	780.711	790.813	824.682	878.937
Spain	ESP	1466.84	1732.26	1745.96	1550.65	1355.08	1334.12	1292.21	1285.23	572.504	363.216	565.779	1131.56	1480.8	1557.64	1564.62	1613.52	1752.97	1830.05	2039.6	2074.52	2214.22	2137.17	2396.1	2605.67	2814.93	3094.61	3618.53	4114.12	4491.31	4721.81	5057.09	5441.26	5448.24	6293.85	6929.05	7362.11	8074.58	9206.14	11469.3	12796.4	14207.9	15499	15862.3	16283.3	18548.9	21171.8	21021.2	22753
Sweden	SWE	444.591	541.403	580.638	491.712	459.431	382.52	551.809	705.478	754.372	831.207	942.965	1124.57	663.568	614.524	782.312	879.897	1005.83	1153.44	1390	1473.82	1410.96	1613.52	1850.77	1934.83	2011.66	2235.18	2339.95	2424	2367.89	2325.98	2382.07	2682.21	2668.24	2891.54	2919.7	3136.44	3443.57	3583.06	3569.12	3702.01	3715.98	3757.89	3869.65	3759.92	3698.76	4031.23	3173.59	2997.34
Switzerland	CHE	600.704	656.583	747.674	810.252	761.357	0	0	0	481.96	0	614.674	0	614.674	677.164	418.833	349.454	405.126	391.156	656.583	908.041	970.905	928.996	1027.15	1250.67	1312.74	1501.76	1724.78	2011.66	2263.12	2381.86	2074.52	2549.5	2884.78	3422.62	3541.36	3401.66	4107.14	3834.26	4107.62	3967.89	4107.14	4309.29	4554.59	4941.95	5389.31	5411.8	4917.45	3513.72
Turkey	TUR	55.8794	62.8644	55.8794	97.6981	104.678	111.759	160.653	125.729	132.714	202.563	251.656	272.412	251.626	258.611	202.563	160.653	272.412	272.412	307.337	335.112	328.292	356.231	377.332	377.051	433.066	502.915	670.736	782.522	922.011	1201.41	1439.22	1648.09	1934.83	1927.84	2207.24	2563.47	2793.97	3163.75	3674.07	4036.85	4490.86	5503.6	6055.93	7124.83	7911.01	8352.24	8289.12	9860.54
Ukraine	UKR	291.56	368.7	510.243	547.3	552.705	424.473	547.425	687.341	893.661	836.241	873.765	873.122	889.394	889.894	0	0	0	276.95	522.541	738.984	1016.81	1232.64	1619.88	1912.27	2176.62	2465.11	2934.56	3476.15	3845.46	4472.37	5158.04	6009.66	7057.16	7889.11	8896.58	9474.7	10088.9	11253.5	12442.4	13190.8	13627.4	13991.3	14848.4	15517.3	16003.2	16666.1	17383.8	18276.7
United Kingdom	GBR	4176.99	4526.23	4854.49	5685.73	4107.1	4246.84	5015.18	5748.6	6363.32	6935.98	7501.87	0	0	6894.18	7005.88	6726.54	4400.54	3911.56	6349.3	6719.45	8221.26	8898.8	9415.75	9869.77	10749.7	10826.6	11546.1	12084	12321.4	11546.1	11259.7	12146.8	12824.3	13655.5	13536.8	13355.2	16114.3	16114.2	15932.6	16693.9	16980.5	16547.2	16205	16806.3	17128.1	18963.4	16870.9	16013.9
USA	USA	29631	28821	27457	20775	12792	10738	13261	12847	19123	19927	17757.2	20742.4	22195.8	27907	30915.3	22901	15436.3	17516.1	28102	31995	35210	35939	38678.5	41825	42394	45021	46377.8	51092.8	54564.8	51903.4	53349.5	58108.3	55348.7	55157.8	57425.1	60416.9	63473.9	63991	66447	64449	67883	68608	67122.6	68248.2	70196.5	70952.9	70740.1	58548.9
Mexico	MEX	202.563	216.533	0	0	0	0	0	237.488	272.458	328.292	356.285	391.156	460.933	509.9	558.686	551.703	579.749	705.478	698.593	949.95	1026.91	1166.34	1452.87	1536.68	1578.59	1585.58	1662.41	1913.87	2165.33	2430.94	2409.8	2570.45	2933.67	2884.78	3184.94	3576.09	4197.73	4085.98	4679.9	5315.31	5818.45	6446.86	6824.28	6934.34	8037.78	9067.28	9733.77	10575.4
Brazil	BRA	83.8191	90.8041	83.7635	160.653	139.699	209.548	307.337	349.014	460.677	544.824	587.087	663.977	705.478	726.433	712.018	712.06	768.342	733.418	781.928	866.131	1054.72	1214.77	1320.15	1383.02	1536.46	1927.56	2374.58	2633.03	3108.29	3227.04	3597.24	3646.13	4246.84	4477.67	4819.27	4924.37	5343.13	5336.83	5741.61	6083.87	6914.75	7431.96	7742.09	8430.27	9788.03	11521.9	12830.9	14394.2
Egypt	EGY	84.1743	167.638	285.359	230.503	230.503	272.412	279.397	363.216	321.307	314.322	356.231	355.646	342.262	398.141	398.141	307.337	404.786	412.111	558.794	614.674	726.433	845.176	970.905	1075.68	901.056	1040.75	1271.66	1299.2	1285.23	1390	1438.9	1697.34	1941.81	1956.2	2123.42	2381.86	2395.83	2297.74	2319	2612.36	2989.55	3430.24	3498.86	3710.62	3608.7	3404.03	3062.56	3347.95
Iran	IRN	0	0	0	0	0	0	0	0	0	0	0	0	62.8644	48.9031	48.9006	34.9246	34.9277	20.9548	41.907	41.9096	62.8644	55.8794	62.8644	62.8644	48.8945	62.9246	62.6446	125.729	209.548	300.301	391.156	551.809	754.298	705.549	705.478	705.415	705.478	747.438	1327.21	1327.14	1844.02	2228.19	2444.73	2704.45	3192.47	3296.89	4259.56	5045.32
Saudi Arabia	SAU	0	0	0	0	0	0	0	0	0	0	0	0	0	0	0	0	0	0	0	0	0	0	0	0	0	0	0	0	0	0	0	69.8493	83.8191	97.8895	174.623	188.494	244.473	237.488	237.488	307.337	481.899	558.794	642.561	669.918	913.244	912.424	1002.02	1063.63
India	IND	537.84	544.824	544.824	558.794	565.779	593.719	726.433	845.176	928.996	1082.66	0	0	0	2018.64	2109.45	2039.74	1969.89	2067.54	1871.96	1397.07	1501.76	2025.63	2521.56	3087.34	3415.46	3646.13	4246.84	4330.66	4756.74	5406.33	5874.12	6587.01	7452.92	7830.33	8158.19	8884.83	9206.36	10051.5	10498.3	11106	11343.5	12594.1	12866.2	14089	14837.3	14068.2	13333	15083.9
China	CHN	90.7943	174.623	167.638	223.518	181.608	258.42	223.518	356.254	977.89	998.905	20.9548	509.9	621.632	1131.56	1494.77	1459.85	1117.63	41.9065	195.578	398.098	188.622	627	1339.5	2365.5	2745.5	3686	4370	4275	6070.5	6517	8835	11656.5	14867.5	5899.5	5700	7657	11485.5	15523	19142.5	13889	11989	17375.5	24462.5	29499.5	32570	33667.1	32879.6	40274
South Korea	KOR	0	0	0	0	0	0	11.0288	23.1606	28.3237	33.1044	0	59.9419	0	65.4378	59.1881	69.8634	50.0069	6.98493	7.03785	14.0271	13.9699	20.9548	13.9465	6.98493	34.9246	41.9423	55.8794	55.8794	41.9096	90.8041	279.511	342.262	412.231	495.93	747.387	740.274	1180.26	1529.7	1788.14	2319.24	3394.68	4589.1	5532.44	6519.01	6137.88	7725.17	8341.62	9537.53
Vietnam	VNM	153.668	174.623	160.653	146.684	160.653	104.774	111.759	104.774	139.699	223.518	251.457	293.367	265.427	286.382	167.638	118.744	0	6.98493	34.9246	35.1056	90.8041	146.684	140.045	202.563	216.533	279.397	244.473	286.382	188.593	153.473	286.382	363.216	384.171	433.066	440.051	467.99	684.523	901.056	838.352	887.086	607.689	705.478	747.387	724.043	471.85	719.264	654.711	652.545
Indonesia	IDN	0	139.699	132.741	125.701	76.8342	69.8493	104.794	132.738	125.729	0	0	160.633	0	160.676	0	0	0	0	0	6.98493	34.9246	0	0	97.789	132.675	139.738	139.699	139.699	139.699	237.449	286.429	328.292	370.138	426.081	481.96	314.322	419.096	349.246	321.307	335.277	391.156	509.956	523.87	461.005	565.779	691.508	789.297	1019.8
[truncated: 49 more columns]

## Sheet: Data2
Data1: Cement production from 1928 to 2024 in 50 coubtries and regions
Unit: kt
Countries	ISO	1928	1929	1930	1931	1932	1933	1934	1935	1936	1937	1938	1939	1940	1941	1942	1943	1944	1945	1946	1947	1948	1949	1950	1951	1952	1953	1954	1955	1956	1957	1958	1959	1960	1961	1962	1963	1964	1965	1966	1967	1968	1969	1970	1971	1972	1973	1974	1975
Australia	AUS	764.666	720.551	705.845	397.038	249.987	323.512	419.096	558.794	654.378	735.162	360.322	683.788	705.756	691.14	566.147	396.996	441.153	705.845	735.256	897.012	1029.36	1073.47	1279.34	1235.23	1360.22	1595.6	1911.66	1992.54	2139.59	2323.41	2455.75	2617.51	2793.97	2860.26	2933.67	3117.48	3624.69	3801.27	3676.28	3823.33	3926.27	4308.6	4507.01	4683.58	4933.68	5249.73	5205.61	5014.44
Austria	AUT	522.122	580.764	602.91	301.455	352.923	279.325	308.807	367.628	367.628	426.551	647.435	742.179	816.134	845.156	683.788	772.018	0	0	389.797	279.397	720.658	1088.33	1286.7	1478.1	1389.63	1396.99	1624.92	1860.2	1933.97	2132.24	2154.3	2418.99	2830.73	3080.72	3058.99	3308.65	3772.22	4043.91	4500.18	4543.88	4551.63	4558.96	4808.92	5491.97	6345.26	6257.03	6433.49	5632.06
Belarus	BLR	42.7045	52.822	68.3371	73.1499	77.1054	60.4745	78.8848	100.193	131.249	122.414	127.833	127.861	130.347	130.523	0	0	0	40.749	76.9441	108.9	149.959	181.931	239.271	282.679	322.005	364.966	434.804	515.445	570.644	664.182	766.595	893.847	1050.45	1175.17	1326.25	1413.51	1506.27	1681.43	1860.46	1973.85	2040.72	2096.77	2226.88	2356.72	2461.47	2596.21	2742.78	2920.86
Belgium	BEL	3044.08	3249.83	3051.19	2463.21	2102.83	1948.43	1896.96	2198.41	2352.82	3007.2	3051.45	2551.34	213.224	632.32	507.357	463.211	602.843	647.025	1889.61	2610.16	3330.71	2926.18	3558.64	4396.83	4110.08	4624.76	4374.77	4690.74	4661.52	4705.81	4058.61	4440.94	4389.65	4757.1	4786.34	4705.47	5845.28	5904.1	5793.61	5815.87	5742.35	6271.54	6727.59	6933.46	7088.06	7043.56	7470.4	6881.99
Bulgaria	BGR	110.288	154.404	176.461	102.936	139.699	117.825	117.465	102.936	110.288	132.346	176.665	176.647	0	0	0	0	124.993	242.634	0	0	323.512	0	603.204	632.036	676.435	698.493	779.371	808.781	860.006	882.307	933.775	1433.75	1588.41	1749.91	1889.61	2205.77	2580.75	2683.9	2852.79	3352.99	3514.31	3551.28	3668.71	3882.15	3911.56	4176.03	4293.89	4360.07
Canada	CAN	1757.26	1948.36	1874.83	1617.56	735.294	382.333	551.467	551.442	786.724	977.89	874.954	911.752	1198.51	1330.81	1448.49	1161.67	1139.68	1345.52	1838.09	1896.96	2242.58	2529.22	2654.34	2698.33	2941.02	3529.15	3558.64	3992.44	4558.59	5485.01	5580.59	5698.23	5249.73	5632.06	6242.32	6359.96	7176.1	7580.49	8095.16	7249.62	7404.11	7484.9	7205.51	8227.51	9050.91	10095.1	10374.4	9962.81
Croatia	HRV	783.737	0	0	876.323	607.355	591.07	634.377	751.826	581.461	616.409	979.617	944.991	0	0	0	122.542	0	204.824	843.7	1570.02	1595.28	1698.82	970.464	917.999	1144.5	896.126	1032.34	1217.5	1231.71	1488.51	1425.63	1578.69	1625.9	1616.18	1655.65	1809.19	1855.81	1643.52	1533.88	1303.92	1346.71	1336.08	1460.37	1707.53	1969.24	1782.38	1890.22	2072.14
Cyprus	CYP	0	0	0	0	0	0	0	0	0	0	0	0	0	0	0	0	0	0	0	0	0	0	0	0	0	0	0	0	36.7628	66.173	80.493	80.8781	88.2307	95.5832	95.5832	95.5832	73.5256	95.5832	95.5832	183.814	235.282	242.634	264.692	301.455	419.096	448.506	338.218	610.262
Czechia	CZE	0	0	792.272	792.144	714.381	563.66	592.9	631.774	694.906	899.064	0	184.405	140.732	198.984	213.539	232.947	0	0	607.181	928.058	1088.57	1146.93	1242.91	1379.56	1468.12	1541.73	1698.55	1918.35	2090.23	2445.78	2745.19	3145.47	3382.88	3581.19	3827.28	3465.54	3682.04	3832.62	4118.73	4350.85	4379.32	4554.67	5013.03	5399.65	5472.35	5720.93	6134.14	6378.29
Denmark	DNK	779.371	801.429	779.371	507.326	411.856	551.442	772.018	757.313	793.892	676.435	639.672	698.493	441.153	419.096	433.801	639.672	647.025	220.577	499.974	632.32	771.853	831.019	874.954	985.243	1213.37	1257.29	1220.52	1257.29	1183.76	1161.7	1066.27	1389.83	1440.92	1580.8	1632.11	1521.98	1896.8	1992.54	2095.48	2198.41	2279.29	2610.16	2602.96	2735.15	2874.85	2889.55	2492.52	2235.18
Estonia	EST	11.1882	13.8389	17.9038	19.1647	20.201	15.8438	20.6672	26.2496	34.3861	32.0714	33.4911	33.4986	34.1499	34.1961	0	0	0	10.6759	20.1587	28.531	39.2881	47.6644	62.687	74.0597	84.3628	95.618	113.915	135.042	149.504	174.01	200.842	234.181	275.208	307.886	347.468	370.328	394.632	440.52	487.424	517.132	534.652	549.337	583.425	617.441	644.885	680.186	718.586	765.241
Finland	FIN	279.397	279.397	205.587	161.756	154.217	161.94	227.929	271.762	330.865	411.521	477.916	565.722	301.455	308.807	176.461	235.5	176.461	277.81	330.865	419.096	558.794	654.378	743.024	831.221	779.041	934.227	1036.3	1044.06	963.185	948.48	926.422	1169.06	1257.29	1345.85	1359.93	1426.4	1573.45	1771.97	1573.45	1514.63	1477.7	1794.02	1875.07	1838.14	1985.19	2095.48	2205.77	2066.23
France	FRA	4242.43	5786.46	4992.39	4904.16	5029.05	4654.17	4874.75	4404.1	4639.38	4257.13	0	0	0	3404.23	2499.87	2926.4	1485.22	1573.45	2117.49	3852.82	5381.97	6440.84	7205.64	8124.58	8646.61	9308.34	9742.14	10617.1	11440.6	12609.6	13411.1	13999.3	14175.7	15381.7	16881.5	18131.4	21535.9	22366.5	23300.3	24381.1	25388.4	27542.7	29006.1	28947	29910.2	30711.6	32336.8	29586.7
Germany	DEU	7712.83	7205.51	5668.82	3838	2889.55	3933.62	6470.25	8808.36	11690.5	12602.3	15602.1	13955.2	10742.1	11345.1	7286.38	9073.1	0	0	2595.45	3073.37	6507.01	9668.61	12484.6	14080.3	15102.1	18109.5	19182.8	21432.8	22469.5	22623.7	23241.5	27366.3	29932.4	32417.3	34027.5	34667.3	39395.1	40218.5	41181.8	38865.6	40990.7	42490.4	46306.4	49482.5	52004.4	50563.5	46071	44152.1
Greece	GRC	147.051	154.404	176.688	198.519	198.519	198.836	249.987	272.387	279.397	286.75	308.41	345.57	191.166	66.173	29.8924	0	0	51.4679	102.936	183.814	278.642	330.865	397.038	433.454	595.103	743.165	852.897	1132.29	1235.95	1227.88	1338.17	1441.1	1640.26	1838.14	1925.68	2294	2668.98	3213.07	3588.05	3448.35	4080.67	4837.98	4845.33	5536.48	6279.08	6492.31	7020.98	7940.01
Hungary	HUN	426.448	404.391	330.865	294.199	198.519	183.747	227.929	279.397	213.224	389.79	397.038	0	0	669.083	727.903	698.626	154.404	36.7792	161.811	205.926	301.455	551.442	801.429	948.48	1058.77	1058.65	948.582	1176.41	992.485	992.595	1301.4	1433.62	1573.57	1602.74	1735.08	1801.49	2257.1	2382.23	2602.81	2654.11	2801.49	2566.04	2771.91	2713.09	2970.28	3404.23	3433.64	3757.16
Iceland	ISL	0	0	0	0	0	0	0	0	0	0	0	0	0	0	0	0	0	0	0	0	0	0	0	0	0	0	0	0	0	0	29.4102	80.8781	73.3041	73.5256	95.5832	95.8525	110.598	110.288	117.641	117.94	102.7	95.5832	87.9985	117.641	132.02	132.07	154.404	161.756
Ireland	IRL	0	0	0	0	0	0	0	0	0	0	110.288	257.339	272.045	294.102	198.623	249.987	220.577	191.166	301.455	293.98	397.038	433.801	440.987	426.448	463.211	470.564	595.797	669.083	713.437	522.032	522.032	624.967	742.365	595.557	757.313	801.429	970.537	1051.42	1109.97	1294.05	1353.15	1271.99	860.249	1499.92	1470.51	1573.45	1536.68	1558.74
Italy	ITA	3073.37	3499.82	3485.11	3073.37	3124.84	3551.71	4073.32	4220.37	3823.77	4360.07	4609.68	5110.03	4801.22	2794.21	2242.33	1712.26	1351.49	1140.61	2021.95	2756.66	3146.57	4036.93	5006.65	5580.59	6654.06	7830.47	8756.4	10661.2	11337.6	11947.9	12823.4	14403.7	16013.9	18028.5	20168.1	22086.6	22837.5	20690.1	22417.9	26255.6	29461.7	31343.9	33071.8	31799.8	33461.5	36306.5	36306.9	34233.5
Japan	JPN	3838.03	4271.84	3749.8	3617.29	3727.75	4786.51	4661.69	5874.69	6234.77	6036.27	5521.62	5073.12	4249.78	5830.44	4352.61	3764.6	2963	1169.06	926.422	1235.23	1860.2	3279.24	4463	6551.13	7117.07	8764.25	10675.9	10565.6	13021.4	15175.4	14984.5	17263.8	22535.6	24631.4	28785.3	29947	32975.9	32689.5	38263	42968	47673.7	51386.7	57188.2	59430.4	66290.7	78113.9	73106.5	65511.6
Kazakhstan	KAZ	118.704	146.828	189.955	203.333	214.328	168.099	219.274	278.502	364.828	340.27	355.333	355.412	362.322	362.812	0	0	0	113.269	213.879	302.707	416.837	505.708	665.094	785.755	895.069	1014.48	1208.61	1432.77	1586.2	1846.21	2130.88	2484.6	2919.89	3266.6	3686.55	3929.09	4186.94	4673.81	5171.45	5486.64	5672.52	5828.33	6190	6550.9	6842.08	7216.61	7624.03	8119.02
Latvia	LVA	7.36785	9.11345	11.7903	12.6206	13.3031	10.4337	13.6101	17.2863	22.6445	21.1202	22.0551	22.06	22.4889	22.5194	0	0	0	7.03047	13.2753	18.7887	25.8727	31.3888	41.2817	48.771	55.556	62.968	75.0172	88.9303	98.4539	114.592	132.262	154.217	181.235	202.754	228.82	243.874	259.879	290.099	320.987	340.55	352.088	361.759	384.207	406.608	424.681	447.928	473.215	503.939
Lithuania	LTU	27.8295	34.4229	44.5337	47.6701	50.2478	39.4098	51.4074	65.2932	85.5318	79.7742	83.3056	83.3241	84.9442	85.059	0	0	0	26.5552	50.1427	70.9678	97.725	118.56	155.927	184.215	209.843	237.84	283.351	335.903	371.875	432.832	499.572	582.499	684.551	765.834	864.289	921.15	981.604	1095.75	1212.42	1286.31	1329.89	1366.42	1451.21	1535.82	1604.08	1691.89	1787.41	1903.46
Luxembourg	LUX	0	0	0	0	0	0	0	0	0	0	0	0	0	0	0	0	0	51.4679	73.5256	88.2307	102.936	117.641	132.346	132.346	110.331	147.051	154.404	154.461	161.756	191.231	198.519	191.166	213.224	227.929	227.929	205.872	205.81	220.577	213.157	183.814	191.109	205.872	242.634	264.692	308.807	360.182	367.628	345.57
Netherlands	NLD	0	213.205	220.577	198.535	257.317	360.275	397.038	360.275	404.391	441.153	455.859	544.089	0	463.165	367.628	360.275	213.224	227.929	404.391	522.074	588.159	551.442	595.557	698.493	816.079	860.249	970.537	1102.82	1257.29	1323.54	1367.58	1602.86	1801.38	1904.31	2014.6	2080.86	2874.85	2970.43	3161.6	3345.41	3433.64	3293.95	3830.58	4043.91	4021.85	4073.32	4088.02	3705.69
New Zealand	NZL	205.712	198.519	191.166	154.27	147.051	176.279	0	124.883	154.404	176.461	220.577	235.282	220.407	220.415	220.418	227.929	227.929	235.435	227.929	220.577	249.821	257.172	257.339	161.829	264.692	279.277	323.512	411.743	448.506	536.737	558.794	558.794	617.615	654.378	632.32	720.551	786.724	845.77	874.954	816.134	764.458	801.429	830.839	823.286	897.012	1058.55	1110.02	1073.47
Norway	NOR	317.717	319.254	321.482	220.173	235.382	222.414	249.987	264.692	301.455	323.412	330.981	389.685	338.218	316.16	375.278	308.807	323.27	139.699	433.801	470.564	529.208	595.557	580.852	698.223	705.579	757.597	772.018	801.429	897.012	1014.65	1029.36	1132.29	1154.35	1271.99	1411.69	1441.1	1544.04	1602.86	1823.43	2154.3	2294	2492.52	2610.5	2742.87	2727.8	2727.8	2639.57	2713.09
Poland	POL	1095.53	1007.3	830.839	544.089	352.923	411.743	720.551	845.544	1051.34	1286.7	1720.6	0	0	0	0	0	0	301.436	1396.99	1521.98	1823.43	2345.38	2514.66	2691.12	2668.98	3293.95	3404.15	3815.89	4036.55	4492.41	5058.45	5315.9	6595.24	7359.91	7543.72	7675.95	8757.03	9573.03	10043.6	11131.8	11602.5	11830.1	12176	13080.2	13984.6	15550.7	16764	18499
Portugal	PRT	73.5256	88.2307	95.6643	95.5832	117.641	161.756	183.978	213.224	242.634	257.148	264.692	294.102	272.045	272.045	242.634	249.676	242.909	264.692	323.512	426.448	499.974	522.032	573.499	640.107	727.903	772.018	779.371	778.929	1022.01	977.89	1022.01	1029.36	1198.47	1242.58	1404.34	1433.75	1624.37	1676.38	1720.5	1823.43	1860.2	2037.17	2331.32	2455.75	2779.27	3301.3	3390.13	3448.35
Romania	ROU	330.931	316.16	397.038	198.547	213.224	220.577	316.16	382.333	374.98	455.859	448.444	529.384	397.038	617.514	367.628	455.859	323.591	249.987	316.094	419.096	448.506	558.794	646.903	1139.83	1499.92	1897.19	1602.86	1933.91	2095.48	2352.82	2573.58	2852.79	3051.31	3308.65	3485.11	4367.19	4749.75	5404.13	5882.05	6330.55	7029.04	7514.56	8124.33	8521.36	9212.75	9845.07	11190.6	11521.5
Russia	RUS	1186.92	1471.98	1924.87	2060.3	2155.72	1685.42	2195.07	2783.88	3642.87	3398.67	3549.74	3550.12	3610.99	3607.73	0	0	0	1116.22	2102.96	2969.67	4080.15	4938.94	6480.99	7639.61	8682.92	9819.29	11672.1	13805.9	15250.1	17710.2	20395.3	23727.7	27822.4	31056.5	34970.8	37188.4	39540.6	44040.1	48620.5	51468.9	53094.2	54431	57680	60626	62889.4	65881.1	69128.6	73119
Slovakia	SVK	0	0	447.316	447.794	403.698	318.887	335.174	357.159	392.8	508.026	0	104.967	80.1257	113.236	121.534	132.592	0	0	344.083	524.896	615.197	648.041	691.618	767.155	814.061	853.777	938.626	1059.62	1151.22	1322.72	1470.19	1664.83	1787.52	1888.78	2019.13	1833.75	1935.9	2008.28	2145.2	2228.94	2234.39	2295.1	2511.98	2674.36	2680.68	2760.61	2923.01	3012.12
Slovenia	SVN	148.454	0	0	164.276	120.38	117.659	122.365	144.317	116.135	113.57	137.377	127.925	0	0	0	92.987	0	25.5943	113.429	236.045	228.538	246.206	216.519	205.817	237.647	222.134	243.801	277.293	275.329	349.073	344.231	386.232	412.82	404.306	430.487	483.769	512.019	506.679	513.149	497.066	549.026	567.79	626.192	716.327	836.425	854.853	899.54	967.484
Spain	ESP	1544.04	1823.43	1837.85	1632.27	1426.4	1404.34	1360.22	1352.87	602.636	382.333	595.557	1191.11	1558.74	1639.62	1646.97	1698.44	1845.23	1926.37	2146.95	2183.71	2330.76	2249.65	2522.21	2742.81	2963.08	3257.49	3808.98	4330.66	4727.69	4970.33	5323.25	5727.64	5734.99	6625.11	7293.74	7749.59	8499.56	9690.67	12072.9	13469.9	14955.7	16314.7	16697.1	17160.9	19572	22366.5	22234.1	24094.8
Sweden	SWE	467.991	569.898	611.198	517.592	483.612	402.653	580.852	742.608	794.076	874.954	992.595	1183.76	698.493	646.867	823.486	926.208	1058.77	1214.15	1463.16	1551.39	1485.22	1698.44	1948.18	2036.66	2117.54	2352.82	2463.11	2551.58	2492.52	2448.4	2507.44	2823.38	2808.68	3043.73	3073.37	3301.52	3624.81	3771.64	3756.97	3896.85	3911.56	3955.68	4073.32	3948.32	3874.8	4213.01	3308.8	3117.63
Switzerland	CHE	632.32	691.14	787.025	852.897	801.429	0	0	0	507.326	0	647.025	0	647.025	712.804	440.877	367.846	426.448	411.743	691.14	955.832	1022.01	977.89	1081.21	1316.5	1381.83	1580.8	1815.55	2117.54	2382.23	2507.22	2183.71	2683.68	3036.61	3602.75	3727.75	3580.7	4323.3	4036.07	4323.81	4176.72	4323.3	4536.09	4794.3	5220.32	5712.94	5757.05	5249.73	3764.51
Turkey	TUR	58.8205	66.173	58.8205	102.84	110.187	117.641	169.109	132.346	139.699	213.224	264.901	286.75	264.869	272.222	213.224	169.109	286.75	286.75	323.512	352.75	345.57	374.98	397.191	396.895	455.859	529.384	706.038	823.708	970.537	1264.64	1514.97	1734.83	2036.66	2029.31	2323.41	2698.39	2941.02	3330.26	3867.44	4249.31	4727.22	5793.27	6374.67	7543.72	8425.46	8948.06	8933.36	10690.6
Ukraine	UKR	306.905	388.105	537.098	576.105	581.795	446.814	576.236	723.517	940.696	880.254	919.753	919.076	936.205	936.73	0	0	0	291.526	550.043	777.877	1070.33	1297.52	1705.13	2012.92	2291.18	2594.86	3089.01	3659.11	4047.85	4707.75	5429.51	6325.96	7428.59	8304.33	9364.82	9973.37	10619.9	11845.8	13097.2	13885	14344.7	14727.7	15629.9	16472.7	17134	17998	18936.6	20084.3
United Kingdom	GBR	4396.83	4764.46	5109.98	5984.98	4323.26	4470.35	5279.14	6051.15	6698.23	7301.03	7896.71	0	0	7257.03	7374.61	7080.57	4632.15	4117.43	6683.47	7073.1	8653.96	9367.16	9911.32	10389.2	11315.5	11396.5	12153.8	12720	12969.9	12153.8	11852.3	12786.1	13499.3	14374.2	14249.3	14058.1	16962.5	16962.3	16771.2	17572.5	17874.2	17418.1	17057.9	17697.6	18043.3	19984.2	17785.8	16888.8
USA	USA	30445	29481	27798	21604	13166	10913	13375	13260	19523	20138	18279	21212	22575	28387	31496	22901	15542	17537	28102	31995	35210	35939	38724	41825	42394	45021	46434	52994	56153	52574	54831	59764	56063	56718	58908	61733	64379	65078	67146	64449	68791	71086	67427	71054	74931	77576	73688	61815
Mexico	MEX	213.224	227.929	0	0	0	0	0	249.987	286.798	345.57	375.037	411.743	485.192	536.737	588.091	580.74	610.262	742.608	735.361	999.948	1080.96	1227.72	1529.33	1617.56	1661.68	1669.03	1749.91	2014.6	2279.29	2558.88	2536.63	2705.74	3088.07	3036.61	3352.57	3764.3	4418.67	4301.04	4926.21	5595.07	6124.68	6786.17	7183.45	7359.91	8602.49	9786.25	10595	11609.9
Brazil	BRA	88.2307	95.5832	88.1721	169.109	147.051	220.577	323.512	367.384	484.924	573.499	617.986	698.923	742.608	764.666	749.493	749.537	808.781	772.018	823.082	911.717	1110.24	1278.71	1389.63	1455.81	1617.32	2029.01	2499.56	2771.62	3271.89	3396.88	3786.57	3838.03	4470.35	4713.34	5072.92	5183.55	5624.34	5617.72	6043.8	6404.08	7278.69	7823.12	9002.43	9802.64	11381.4	13397.6	14919.6	16737.5
Egypt	EGY	88.6045	176.461	300.378	242.634	242.634	286.75	294.102	382.333	338.218	330.865	374.98	374.365	360.275	419.096	419.096	323.512	426.09	433.801	588.205	647.025	764.666	889.659	1022.01	1132.29	948.48	1095.53	1338.59	1367.58	1352.87	1463.16	1514.63	1786.67	2044.01	2059.16	2235.18	2507.22	2521.93	2418.67	2441.05	2749.86	3146.89	3610.78	3683.01	3918.29	3822.78	3617.46	3264.99	3580.7
Iran	IRN	0	0	0	0	0	0	0	0	0	0	0	0	66.173	51.477	51.4743	36.7628	36.766	22.0577	44.1127	44.1153	66.173	58.8205	66.173	66.173	51.4679	66.2364	65.9416	132.346	220.577	316.107	411.743	580.852	793.998	742.683	742.608	742.542	742.608	786.777	1397.07	1396.99	1941.07	2345.47	2573.39	2852.79	3374.71	3492.46	4521.82	5367.37
Saudi Arabia	SAU	0	0	0	0	0	0	0	0	0	0	0	0	0	0	0	0	0	0	0	0	0	0	0	0	0	0	0	0	0	0	0	73.5256	88.2307	103.042	183.814	198.414	257.339	249.987	249.987	323.512	507.262	588.205	676.38	705.845	963.135	963.185	1058.77	1124.94
India	IND	566.147	573.499	573.499	588.205	595.557	624.967	764.666	889.659	977.89	1139.65	0	0	0	2124.89	2220.47	2147.1	2073.57	2176.36	1970.49	1470.6	1580.8	2132.24	2654.27	3249.83	3595.22	3838.03	4470.35	4558.59	5007.09	5690.88	6183.28	6933.69	7845.18	8242.45	8587.57	9352.45	9690.91	10580.6	11050.9	11690.6	11940.6	13256.9	13543.4	14896	15756.8	15006.6	14286	16234.7
China	CHN	95.573	183.814	176.461	235.282	191.166	272.021	235.282	375.004	1029.36	1051.48	22.0577	536.737	654.35	1191.11	1573.45	1536.68	1176.45	44.1121	205.872	419.05	198.55	660	1410	2490	2890	3880	4600	4500	6390	6860	9300	12270	15650	6210	6000	8060	12090	16340	20150	14620	12620	18290	25750	31580	35470	37310	37090	46260
South Korea	KOR	0	0	0	0	0	0	11.6093	24.3795	29.8144	34.8467	0	63.0967	0	68.8818	62.3032	73.5404	52.6389	7.35256	7.40826	14.7654	14.7051	22.0577	14.6805	7.35256	36.7628	44.1498	58.8205	58.8205	44.1153	95.5832	294.222	360.275	433.928	522.032	786.724	779.236	1242.38	1610.21	1882.25	2441.3	3573.34	4830.63	5823.62	6874.64	6484.56	8176.45	8845.13	10131.8
Vietnam	VNM	161.756	183.814	169.109	154.404	169.109	110.288	117.641	110.288	147.051	235.282	264.692	308.807	279.397	301.455	176.461	124.993	0	7.35256	36.7628	36.9533	95.5832	154.404	147.416	213.224	227.929	294.102	257.339	301.455	198.519	161.55	301.455	382.333	404.391	455.859	463.211	492.621	720.551	948.48	882.475	933.775	639.672	742.608	786.724	764.666	499.974	764.666	698.359	698.375
Indonesia	IDN	0	147.051	139.727	132.317	80.8781	73.5256	110.309	139.724	132.346	0	0	169.088	0	169.132	0	0	0	0	0	7.35256	36.7628	0	0	102.936	139.658	147.092	147.051	147.051	147.051	249.946	301.505	345.57	389.619	448.506	507.326	330.865	441.153	367.628	338.218	352.923	411.743	536.796	551.442	485.269	595.557	727.903	830.839	1073.47
Source：The Global Carbon Project CEMent-process emissions dataset (https://zenodo.org/records/17287474)
[truncated: 49 more columns]

## Sheet: Data3
Data2: Cement import from 1928 to 2024 in 50 coubtries and regions
Unit: kt
Countries	ISO	1928	1929	1930	1931	1932	1933	1934	1935	1936	1937	1938	1939	1940	1941	1942	1943	1944	1945	1946	1947	1948	1949	1950	1951	1952	1953	1954	1955	1956	1957	1958	1959	1960	1961	1962	1963	1964	1965	1966	1967	1968	1969	1970	1971	1972	1973	1974	1975
Australia	AUS	0	0	0	0	0	0	0	0	0	0	0	0	0	0	0	0	0	0	0	0	0	0	0	0	0	0	0	0	0	0	0	0	0	0	0	0	0	0	0	0	0	0	0	0	0	0	0	0
Austria	AUT	0	0	0	0	0	0	0	0	0	0	0	0	0	0	0	0	0	0	0	0	0	0	0	0	0	0	0	0	0	0	0	0	0	0	0	0	0	0	0	0	0	0	0	0	0	0	0	0
Belarus	BLR	0	0	0	0	0	0	0	0	0	0	0	0	0	0	0	0	0	0	0	0	0	0	0	0	0	0	0	0	0	0	0	0	0	0	0	0	0	0	0	0	0	0	0	0	0	0	0	0
Belgium	BEL	0	0	0	0	0	0	0	0	0	0	0	0	0	0	0	0	0	0	0	0	0	0	0	0	0	0	0	0	0	0	0	0	0	0	0	0	0	0	0	0	0	0	0	0	0	0	0	0
Bulgaria	BGR	0	0	0	0	0	0	0	0	0	0	0	0	0	0	0	0	0	0	0	0	0	0	0	0	0	0	0	0	0	0	0	0	0	0	0	0	0	0	0	0	0	0	0	0	0	0	0	0
Canada	CAN	0	0	0	0	0	0	0	0	0	0	0	0	0	0	0	0	0	0	0	0	0	0	0	0	0	0	0	0	0	0	0	0	0	0	0	0	0	0	0	0	0	0	0	0	0	0	0	0
Croatia	HRV	0	0	0	0	0	0	0	0	0	0	0	0	0	0	0	0	0	0	0	0	0	0	0	0	0	0	0	0	0	0	0	0	0	0	0	0	0	0	0	0	0	0	0	0	0	0	0	0
Cyprus	CYP	0	0	0	0	0	0	0	0	0	0	0	0	0	0	0	0	0	0	0	0	0	0	0	0	0	0	0	0	0	0	0	0	0	0	0	0	0	0	0	0	0	0	0	0	0	0	0	0
Czechia	CZE	0	0	0	0	0	0	0	0	0	0	0	0	0	0	0	0	0	0	0	0	0	0	0	0	0	0	0	0	0	0	0	0	0	0	0	0	0	0	0	0	0	0	0	0	0	0	0	0
Denmark	DNK	0	0	0	0	0	0	0	0	0	0	0	0	0	0	0	0	0	0	0	0	0	0	0	0	0	0	0	0	0	0	0	0	0	0	0	0	0	0	0	0	0	0	0	0	0	0	0	0
Estonia	EST	0	0	0	0	0	0	0	0	0	0	0	0	0	0	0	0	0	0	0	0	0	0	0	0	0	0	0	0	0	0	0	0	0	0	0	0	0	0	0	0	0	0	0	0	0	0	0	0
Finland	FIN	0	0	0	0	0	0	0	0	0	0	0	0	0	0	0	0	0	0	0	0	0	0	0	0	0	0	0	0	0	0	0	0	0	0	0	0	0	0	0	0	0	0	0	0	0	0	0	0
France	FRA	0	0	0	0	0	0	0	0	0	0	0	0	0	0	0	0	0	0	0	0	0	0	0	0	0	0	0	0	0	0	0	0	0	0	0	0	0	0	0	0	0	0	0	0	0	0	0	0
Germany	DEU	0	0	0	0	0	0	0	0	0	0	0	0	0	0	0	0	0	0	0	0	0	0	0	0	0	0	0	0	0	0	0	0	0	0	0	0	0	0	0	0	0	0	0	0	0	0	0	0
Greece	GRC	0	0	0	0	0	0	0	0	0	0	0	0	0	0	0	0	0	0	0	0	0	0	0	0	0	0	0	0	0	0	0	0	0	0	0	0	0	0	0	0	0	0	0	0	0	0	0	0
Hungary	HUN	0	0	0	0	0	0	0	0	0	0	0	0	0	0	0	0	0	0	0	0	0	0	0	0	0	0	0	0	0	0	0	0	0	0	0	0	0	0	0	0	0	0	0	0	0	0	0	0
Iceland	ISL	0	0	0	0	0	0	0	0	0	0	0	0	0	0	0	0	0	0	0	0	0	0	0	0	0	0	0	0	0	0	0	0	0	0	0	0	0	0	0	0	0	0	0	0	0	0	0	0
Ireland	IRL	0	0	0	0	0	0	0	0	0	0	0	0	0	0	0	0	0	0	0	0	0	0	0	0	0	0	0	0	0	0	0	0	0	0	0	0	0	0	0	0	0	0	0	0	0	0	0	0
Italy	ITA	0	0	0	0	0	0	0	0	0	0	0	0	0	0	0	0	0	0	0	0	0	0	0	0	0	0	0	0	0	0	0	0	0	0	0	0	0	0	0	0	0	0	0	0	0	0	0	0
Japan	JPN	0	0	0	0	0	0	0	0	0	0	0	0	0	0	0	0	0	0	0	0	0	0	0	0	0	0	0	0	0	0	0	0	0	0	0	0	0	0	0	0	0	0	0	0	0	0	0	0
Kazakhstan	KAZ	0	0	0	0	0	0	0	0	0	0	0	0	0	0	0	0	0	0	0	0	0	0	0	0	0	0	0	0	0	0	0	0	0	0	0	0	0	0	0	0	0	0	0	0	0	0	0	0
Latvia	LVA	0	0	0	0	0	0	0	0	0	0	0	0	0	0	0	0	0	0	0	0	0	0	0	0	0	0	0	0	0	0	0	0	0	0	0	0	0	0	0	0	0	0	0	0	0	0	0	0
Lithuania	LTU	0	0	0	0	0	0	0	0	0	0	0	0	0	0	0	0	0	0	0	0	0	0	0	0	0	0	0	0	0	0	0	0	0	0	0	0	0	0	0	0	0	0	0	0	0	0	0	0
Luxembourg	LUX	0	0	0	0	0	0	0	0	0	0	0	0	0	0	0	0	0	0	0	0	0	0	0	0	0	0	0	0	0	0	0	0	0	0	0	0	0	0	0	0	0	0	0	0	0	0	0	0
Netherlands	NLD	0	0	0	0	0	0	0	0	0	0	0	0	0	0	0	0	0	0	0	0	0	0	0	0	0	0	0	0	0	0	0	0	0	0	0	0	0	0	0	0	0	0	0	0	0	0	0	0
New Zealand	NZL	0	0	0	0	0	0	0	0	0	0	0	0	0	0	0	0	0	0	0	0	0	0	0	0	0	0	0	0	0	0	0	0	0	0	0	0	0	0	0	0	0	0	0	0	0	0	0	0
Norway	NOR	0	0	0	0	0	0	0	0	0	0	0	0	0	0	0	0	0	0	0	0	0	0	0	0	0	0	0	0	0	0	0	0	0	0	0	0	0	0	0	0	0	0	0	0	0	0	0	0
Poland	POL	0	0	0	0	0	0	0	0	0	0	0	0	0	0	0	0	0	0	0	0	0	0	0	0	0	0	0	0	0	0	0	0	0	0	0	0	0	0	0	0	0	0	0	0	0	0	0	0
Portugal	PRT	0	0	0	0	0	0	0	0	0	0	0	0	0	0	0	0	0	0	0	0	0	0	0	0	0	0	0	0	0	0	0	0	0	0	0	0	0	0	0	0	0	0	0	0	0	0	0	0
Romania	ROU	0	0	0	0	0	0	0	0	0	0	0	0	0	0	0	0	0	0	0	0	0	0	0	0	0	0	0	0	0	0	0	0	0	0	0	0	0	0	0	0	0	0	0	0	0	0	0	0
Russia	RUS	0	0	0	0	0	0	0	0	0	0	0	0	0	0	0	0	0	0	0	0	0	0	0	0	0	0	0	0	0	0	0	0	0	0	0	0	0	0	0	0	0	0	0	0	0	0	0	0
Slovakia	SVK	0	0	0	0	0	0	0	0	0	0	0	0	0	0	0	0	0	0	0	0	0	0	0	0	0	0	0	0	0	0	0	0	0	0	0	0	0	0	0	0	0	0	0	0	0	0	0	0
Slovenia	SVN	0	0	0	0	0	0	0	0	0	0	0	0	0	0	0	0	0	0	0	0	0	0	0	0	0	0	0	0	0	0	0	0	0	0	0	0	0	0	0	0	0	0	0	0	0	0	0	0
Spain	ESP	0	0	0	0	0	0	0	0	0	0	0	0	0	0	0	0	0	0	0	0	0	0	0	0	0	0	0	0	0	0	0	0	0	0	0	0	0	0	0	0	0	0	0	0	0	0	0	0
Sweden	SWE	0	0	0	0	0	0	0	0	0	0	0	0	0	0	0	0	0	0	0	0	0	0	0	0	0	0	0	0	0	0	0	0	0	0	0	0	0	0	0	0	0	0	0	0	0	0	0	0
Switzerland	CHE	0	0	0	0	0	0	0	0	0	0	0	0	0	0	0	0	0	0	0	0	0	0	0	0	0	0	0	0	0	0	0	0	0	0	0	0	0	0	0	0	0	0	0	0	0	0	0	0
Turkey	TUR	0	0	0	0	0	0	0	0	0	0	0	0	0	0	0	0	0	0	0	0	0	0	0	0	0	0	0	0	0	0	0	0	0	0	0	0	0	0	0	0	0	0	0	0	0	0	0	0
Ukraine	UKR	0	0	0	0	0	0	0	0	0	0	0	0	0	0	0	0	0	0	0	0	0	0	0	0	0	0	0	0	0	0	0	0	0	0	0	0	0	0	0	0	0	0	0	0	0	0	0	0
United Kingdom	GBR	0	0	0	0	0	0	0	0	0	0	0	0	0	0	0	0	0	0	0	0	0	0	0	0	0	0	0	0	0	0	0	0	0	0	0	0	0	0	0	0	0	0	0	0	0	0	0	0
USA	USA	0	0	0	0	0	0	0	0	0	0	0	0	0	0	0	0	0	0	0	0	0	0	0	0	0	0	0	0	0	0	0	0	0	0	0	0	0	0	0	0	0	0	0	0	0	0	0	0
Mexico	MEX	0	0	0	0	0	0	0	0	0	0	0	0	0	0	0	0	0	0	0	0	0	0	0	0	0	0	0	0	0	0	0	0	0	0	0	0	0	0	0	0	0	0	0	0	0	0	0	0
Brazil	BRA	0	0	0	0	0	0	0	0	0	0	0	0	0	0	0	0	0	0	0	0	0	0	0	0	0	0	0	0	0	0	0	0	0	0	0	0	0	0	0	0	0	0	0	0	0	0	0	0
Egypt	EGY	0	0	0	0	0	0	0	0	0	0	0	0	0	0	0	0	0	0	0	0	0	0	0	0	0	0	0	0	0	0	0	0	0	0	0	0	0	0	0	0	0	0	0	0	0	0	0	0
Iran	IRN	0	0	0	0	0	0	0	0	0	0	0	0	0	0	0	0	0	0	0	0	0	0	0	0	0	0	0	0	0	0	0	0	0	0	0	0	0	0	0	0	0	0	0	0	0	0	0	0
Saudi Arabia	SAU	0	0	0	0	0	0	0	0	0	0	0	0	0	0	0	0	0	0	0	0	0	0	0	0	0	0	0	0	0	0	0	0	0	0	0	0	0	0	0	0	0	0	0	0	0	0	0	0
India	IND	0	0	0	0	0	0	0	0	0	0	0	0	0	0	0	0	0	0	0	0	0	0	0	0	0	0	0	0	0	0	0	0	0	0	0	0	0	0	0	0	0	0	0	0	0	0	0	0
China	CHN	0	0	0	0	0	0	0	0	0	0	0	0	0	0	0	0	0	0	0	0	0	0	0	0	0	0	0	0	0	0	0	0	0	0	0	0	0	0	0	0	0	0	0	0	0	0	0	0
South Korea	KOR	0	0	0	0	0	0	0	0	0	0	0	0	0	0	0	0	0	0	0	0	0	0	0	0	0	0	0	0	0	0	0	0	0	0	0	0	0	0	0	0	0	0	0	0	0	0	0	0
Vietnam	VNM	0	0	0	0	0	0	0	0	0	0	0	0	0	0	0	0	0	0	0	0	0	0	0	0	0	0	0	0	0	0	0	0	0	0	0	0	0	0	0	0	0	0	0	0	0	0	0	0
Indonesia	IDN	0	0	0	0	0	0	0	0	0	0	0	0	0	0	0	0	0	0	0	0	0	0	0	0	0	0	0	0	0	0	0	0	0	0	0	0	0	0	0	0	0	0	0	0	0	0	0	0
Source: UN Comtrade Database. https://comtradeplus.un.org/.
[truncated: 49 more columns]

## Sheet: Data4
Data3: Cement export from 1928 to 2024 in 50 coubtries and regions
Unit: kt
Countries	ISO	1928	1929	1930	1931	1932	1933	1934	1935	1936	1937	1938	1939	1940	1941	1942	1943	1944	1945	1946	1947	1948	1949	1950	1951	1952	1953	1954	1955	1956	1957	1958	1959	1960	1961	1962	1963	1964	1965	1966	1967	1968	1969	1970	1971	1972	1973	1974	1975
Australia	AUS	0	0	0	0	0	0	0	0	0	0	0	0	0	0	0	0	0	0	0	0	0	0	0	0	0	0	0	0	0	0	0	0	0	0	0	0	0	0	0	0	0	0	0	0	0	0	0	0
Austria	AUT	0	0	0	0	0	0	0	0	0	0	0	0	0	0	0	0	0	0	0	0	0	0	0	0	0	0	0	0	0	0	0	0	0	0	0	0	0	0	0	0	0	0	0	0	0	0	0	0
Belarus	BLR	0	0	0	0	0	0	0	0	0	0	0	0	0	0	0	0	0	0	0	0	0	0	0	0	0	0	0	0	0	0	0	0	0	0	0	0	0	0	0	0	0	0	0	0	0	0	0	0
Belgium	BEL	0	0	0	0	0	0	0	0	0	0	0	0	0	0	0	0	0	0	0	0	0	0	0	0	0	0	0	0	0	0	0	0	0	0	0	0	0	0	0	0	0	0	0	0	0	0	0	0
Bulgaria	BGR	0	0	0	0	0	0	0	0	0	0	0	0	0	0	0	0	0	0	0	0	0	0	0	0	0	0	0	0	0	0	0	0	0	0	0	0	0	0	0	0	0	0	0	0	0	0	0	0
Canada	CAN	0	0	0	0	0	0	0	0	0	0	0	0	0	0	0	0	0	0	0	0	0	0	0	0	0	0	0	0	0	0	0	0	0	0	0	0	0	0	0	0	0	0	0	0	0	0	0	0
Croatia	HRV	0	0	0	0	0	0	0	0	0	0	0	0	0	0	0	0	0	0	0	0	0	0	0	0	0	0	0	0	0	0	0	0	0	0	0	0	0	0	0	0	0	0	0	0	0	0	0	0
Cyprus	CYP	0	0	0	0	0	0	0	0	0	0	0	0	0	0	0	0	0	0	0	0	0	0	0	0	0	0	0	0	0	0	0	0	0	0	0	0	0	0	0	0	0	0	0	0	0	0	0	0
Czechia	CZE	0	0	0	0	0	0	0	0	0	0	0	0	0	0	0	0	0	0	0	0	0	0	0	0	0	0	0	0	0	0	0	0	0	0	0	0	0	0	0	0	0	0	0	0	0	0	0	0
Denmark	DNK	0	0	0	0	0	0	0	0	0	0	0	0	0	0	0	0	0	0	0	0	0	0	0	0	0	0	0	0	0	0	0	0	0	0	0	0	0	0	0	0	0	0	0	0	0	0	0	0
Estonia	EST	0	0	0	0	0	0	0	0	0	0	0	0	0	0	0	0	0	0	0	0	0	0	0	0	0	0	0	0	0	0	0	0	0	0	0	0	0	0	0	0	0	0	0	0	0	0	0	0
Finland	FIN	0	0	0	0	0	0	0	0	0	0	0	0	0	0	0	0	0	0	0	0	0	0	0	0	0	0	0	0	0	0	0	0	0	0	0	0	0	0	0	0	0	0	0	0	0	0	0	0
France	FRA	0	0	0	0	0	0	0	0	0	0	0	0	0	0	0	0	0	0	0	0	0	0	0	0	0	0	0	0	0	0	0	0	0	0	0	0	0	0	0	0	0	0	0	0	0	0	0	0
Germany	DEU	0	0	0	0	0	0	0	0	0	0	0	0	0	0	0	0	0	0	0	0	0	0	0	0	0	0	0	0	0	0	0	0	0	0	0	0	0	0	0	0	0	0	0	0	0	0	0	0
Greece	GRC	0	0	0	0	0	0	0	0	0	0	0	0	0	0	0	0	0	0	0	0	0	0	0	0	0	0	0	0	0	0	0	0	0	0	0	0	0	0	0	0	0	0	0	0	0	0	0	0
Hungary	HUN	0	0	0	0	0	0	0	0	0	0	0	0	0	0	0	0	0	0	0	0	0	0	0	0	0	0	0	0	0	0	0	0	0	0	0	0	0	0	0	0	0	0	0	0	0	0	0	0
Iceland	ISL	0	0	0	0	0	0	0	0	0	0	0	0	0	0	0	0	0	0	0	0	0	0	0	0	0	0	0	0	0	0	0	0	0	0	0	0	0	0	0	0	0	0	0	0	0	0	0	0
Ireland	IRL	0	0	0	0	0	0	0	0	0	0	0	0	0	0	0	0	0	0	0	0	0	0	0	0	0	0	0	0	0	0	0	0	0	0	0	0	0	0	0	0	0	0	0	0	0	0	0	0
Italy	ITA	0	0	0	0	0	0	0	0	0	0	0	0	0	0	0	0	0	0	0	0	0	0	0	0	0	0	0	0	0	0	0	0	0	0	0	0	0	0	0	0	0	0	0	0	0	0	0	0
Japan	JPN	0	0	0	0	0	0	0	0	0	0	0	0	0	0	0	0	0	0	0	0	0	0	0	0	0	0	0	0	0	0	0	0	0	0	0	0	0	0	0	0	0	0	0	0	0	0	0	0
Kazakhstan	KAZ	0	0	0	0	0	0	0	0	0	0	0	0	0	0	0	0	0	0	0	0	0	0	0	0	0	0	0	0	0	0	0	0	0	0	0	0	0	0	0	0	0	0	0	0	0	0	0	0
Latvia	LVA	0	0	0	0	0	0	0	0	0	0	0	0	0	0	0	0	0	0	0	0	0	0	0	0	0	0	0	0	0	0	0	0	0	0	0	0	0	0	0	0	0	0	0	0	0	0	0	0
Lithuania	LTU	0	0	0	0	0	0	0	0	0	0	0	0	0	0	0	0	0	0	0	0	0	0	0	0	0	0	0	0	0	0	0	0	0	0	0	0	0	0	0	0	0	0	0	0	0	0	0	0
Luxembourg	LUX	0	0	0	0	0	0	0	0	0	0	0	0	0	0	0	0	0	0	0	0	0	0	0	0	0	0	0	0	0	0	0	0	0	0	0	0	0	0	0	0	0	0	0	0	0	0	0	0
Netherlands	NLD	0	0	0	0	0	0	0	0	0	0	0	0	0	0	0	0	0	0	0	0	0	0	0	0	0	0	0	0	0	0	0	0	0	0	0	0	0	0	0	0	0	0	0	0	0	0	0	0
New Zealand	NZL	0	0	0	0	0	0	0	0	0	0	0	0	0	0	0	0	0	0	0	0	0	0	0	0	0	0	0	0	0	0	0	0	0	0	0	0	0	0	0	0	0	0	0	0	0	0	0	0
Norway	NOR	0	0	0	0	0	0	0	0	0	0	0	0	0	0	0	0	0	0	0	0	0	0	0	0	0	0	0	0	0	0	0	0	0	0	0	0	0	0	0	0	0	0	0	0	0	0	0	0
Poland	POL	0	0	0	0	0	0	0	0	0	0	0	0	0	0	0	0	0	0	0	0	0	0	0	0	0	0	0	0	0	0	0	0	0	0	0	0	0	0	0	0	0	0	0	0	0	0	0	0
Portugal	PRT	0	0	0	0	0	0	0	0	0	0	0	0	0	0	0	0	0	0	0	0	0	0	0	0	0	0	0	0	0	0	0	0	0	0	0	0	0	0	0	0	0	0	0	0	0	0	0	0
Romania	ROU	0	0	0	0	0	0	0	0	0	0	0	0	0	0	0	0	0	0	0	0	0	0	0	0	0	0	0	0	0	0	0	0	0	0	0	0	0	0	0	0	0	0	0	0	0	0	0	0
Russia	RUS	0	0	0	0	0	0	0	0	0	0	0	0	0	0	0	0	0	0	0	0	0	0	0	0	0	0	0	0	0	0	0	0	0	0	0	0	0	0	0	0	0	0	0	0	0	0	0	0
Slovakia	SVK	0	0	0	0	0	0	0	0	0	0	0	0	0	0	0	0	0	0	0	0	0	0	0	0	0	0	0	0	0	0	0	0	0	0	0	0	0	0	0	0	0	0	0	0	0	0	0	0
Slovenia	SVN	0	0	0	0	0	0	0	0	0	0	0	0	0	0	0	0	0	0	0	0	0	0	0	0	0	0	0	0	0	0	0	0	0	0	0	0	0	0	0	0	0	0	0	0	0	0	0	0
Spain	ESP	0	0	0	0	0	0	0	0	0	0	0	0	0	0	0	0	0	0	0	0	0	0	0	0	0	0	0	0	0	0	0	0	0	0	0	0	0	0	0	0	0	0	0	0	0	0	0	0
Sweden	SWE	0	0	0	0	0	0	0	0	0	0	0	0	0	0	0	0	0	0	0	0	0	0	0	0	0	0	0	0	0	0	0	0	0	0	0	0	0	0	0	0	0	0	0	0	0	0	0	0
Switzerland	CHE	0	0	0	0	0	0	0	0	0	0	0	0	0	0	0	0	0	0	0	0	0	0	0	0	0	0	0	0	0	0	0	0	0	0	0	0	0	0	0	0	0	0	0	0	0	0	0	0
Turkey	TUR	0	0	0	0	0	0	0	0	0	0	0	0	0	0	0	0	0	0	0	0	0	0	0	0	0	0	0	0	0	0	0	0	0	0	0	0	0	0	0	0	0	0	0	0	0	0	0	0
Ukraine	UKR	0	0	0	0	0	0	0	0	0	0	0	0	0	0	0	0	0	0	0	0	0	0	0	0	0	0	0	0	0	0	0	0	0	0	0	0	0	0	0	0	0	0	0	0	0	0	0	0
United Kingdom	GBR	0	0	0	0	0	0	0	0	0	0	0	0	0	0	0	0	0	0	0	0	0	0	0	0	0	0	0	0	0	0	0	0	0	0	0	0	0	0	0	0	0	0	0	0	0	0	0	0
USA	USA	0	0	0	0	0	0	0	0	0	0	0	0	0	0	0	0	0	0	0	0	0	0	0	0	0	0	0	0	0	0	0	0	0	0	0	0	0	0	0	0	0	0	0	0	0	0	0	0
Mexico	MEX	0	0	0	0	0	0	0	0	0	0	0	0	0	0	0	0	0	0	0	0	0	0	0	0	0	0	0	0	0	0	0	0	0	0	0	0	0	0	0	0	0	0	0	0	0	0	0	0
Brazil	BRA	0	0	0	0	0	0	0	0	0	0	0	0	0	0	0	0	0	0	0	0	0	0	0	0	0	0	0	0	0	0	0	0	0	0	0	0	0	0	0	0	0	0	0	0	0	0	0	0
Egypt	EGY	0	0	0	0	0	0	0	0	0	0	0	0	0	0	0	0	0	0	0	0	0	0	0	0	0	0	0	0	0	0	0	0	0	0	0	0	0	0	0	0	0	0	0	0	0	0	0	0
Iran	IRN	0	0	0	0	0	0	0	0	0	0	0	0	0	0	0	0	0	0	0	0	0	0	0	0	0	0	0	0	0	0	0	0	0	0	0	0	0	0	0	0	0	0	0	0	0	0	0	0
Saudi Arabia	SAU	0	0	0	0	0	0	0	0	0	0	0	0	0	0	0	0	0	0	0	0	0	0	0	0	0	0	0	0	0	0	0	0	0	0	0	0	0	0	0	0	0	0	0	0	0	0	0	0
India	IND	0	0	0	0	0	0	0	0	0	0	0	0	0	0	0	0	0	0	0	0	0	0	0	0	0	0	0	0	0	0	0	0	0	0	0	0	0	0	0	0	0	0	0	0	0	0	0	0
China	CHN	0	0	0	0	0	0	0	0	0	0	0	0	0	0	0	0	0	0	0	0	0	0	0	0	0	0	0	0	0	0	0	0	0	0	0	0	0	0	0	0	0	0	0	0	0	0	0	0
South Korea	KOR	0	0	0	0	0	0	0	0	0	0	0	0	0	0	0	0	0	0	0	0	0	0	0	0	0	0	0	0	0	0	0	0	0	0	0	0	0	0	0	0	0	0	0	0	0	0	0	0
Vietnam	VNM	0	0	0	0	0	0	0	0	0	0	0	0	0	0	0	0	0	0	0	0	0	0	0	0	0	0	0	0	0	0	0	0	0	0	0	0	0	0	0	0	0	0	0	0	0	0	0	0
Indonesia	IDN	0	0	0	0	0	0	0	0	0	0	0	0	0	0	0	0	0	0	0	0	0	0	0	0	0	0	0	0	0	0	0	0	0	0	0	0	0	0	0	0	0	0	0	0	0	0	0	0
Source: UN Comtrade Database. https://comtradeplus.un.org/.
[truncated: 49 more columns]

## Sheet: Data5
Data4: Clinker production from 1928 to 2024 in 50 coubtries and regions
Unit: kt
Countries	ISO	1928	1929	1930	1931	1932	1933	1934	1935	1936	1937	1938	1939	1940	1941	1942	1943	1944	1945	1946	1947	1948	1949	1950	1951	1952	1953	1954	1955	1956	1957	1958	1959	1960	1961	1962	1963	1964	1965	1966	1967	1968	1969	1970	1971	1972	1973	1974	1975
Australia	AUS	0	0	0	0	0	0	0	0	0	0	0	0	0	0	0	0	0	0	0	0	0	0	0	0	0	0	0	0	0	0	0	0	0	0	0	0	0	0	0	0	0	0	0	0	0	0	0	0
Austria	AUT	0	0	0	0	0	0	0	0	0	0	0	0	0	0	0	0	0	0	0	0	0	0	0	0	0	0	0	0	0	0	0	0	0	0	0	0	0	0	0	0	0	0	0	0	0	0	0	0
Belarus	BLR	0	0	0	0	0	0	0	0	0	0	0	0	0	0	0	0	0	0	0	0	0	0	0	0	0	0	0	0	0	0	0	0	0	0	0	0	0	0	0	0	0	0	0	0	0	0	0	0
Belgium	BEL	0	0	0	0	0	0	0	0	0	0	0	0	0	0	0	0	0	0	0	0	0	0	0	0	0	0	0	0	0	0	0	0	0	0	0	0	0	0	0	0	0	0	0	0	0	0	0	0
Bulgaria	BGR	0	0	0	0	0	0	0	0	0	0	0	0	0	0	0	0	0	0	0	0	0	0	0	0	0	0	0	0	0	0	0	0	0	0	0	0	0	0	0	0	0	0	0	0	0	0	0	0
Canada	CAN	0	0	0	0	0	0	0	0	0	0	0	0	0	0	0	0	0	0	0	0	0	0	0	0	0	0	0	0	0	0	0	0	0	0	0	0	0	0	0	0	0	0	0	0	0	0	0	0
Croatia	HRV	0	0	0	0	0	0	0	0	0	0	0	0	0	0	0	0	0	0	0	0	0	0	0	0	0	0	0	0	0	0	0	0	0	0	0	0	0	0	0	0	0	0	0	0	0	0	0	0
Cyprus	CYP	0	0	0	0	0	0	0	0	0	0	0	0	0	0	0	0	0	0	0	0	0	0	0	0	0	0	0	0	0	0	0	0	0	0	0	0	0	0	0	0	0	0	0	0	0	0	0	0
Czechia	CZE	0	0	0	0	0	0	0	0	0	0	0	0	0	0	0	0	0	0	0	0	0	0	0	0	0	0	0	0	0	0	0	0	0	0	0	0	0	0	0	0	0	0	0	0	0	0	0	0
Denmark	DNK	0	0	0	0	0	0	0	0	0	0	0	0	0	0	0	0	0	0	0	0	0	0	0	0	0	0	0	0	0	0	0	0	0	0	0	0	0	0	0	0	0	0	0	0	0	0	0	0
Estonia	EST	0	0	0	0	0	0	0	0	0	0	0	0	0	0	0	0	0	0	0	0	0	0	0	0	0	0	0	0	0	0	0	0	0	0	0	0	0	0	0	0	0	0	0	0	0	0	0	0
Finland	FIN	0	0	0	0	0	0	0	0	0	0	0	0	0	0	0	0	0	0	0	0	0	0	0	0	0	0	0	0	0	0	0	0	0	0	0	0	0	0	0	0	0	0	0	0	0	0	0	0
France	FRA	0	0	0	0	0	0	0	0	0	0	0	0	0	0	0	0	0	0	0	0	0	0	0	0	0	0	0	0	0	0	0	0	0	0	0	0	0	0	0	0	0	0	0	0	0	0	0	0
Germany	DEU	0	0	0	0	0	0	0	0	0	0	0	0	0	0	0	0	0	0	0	0	0	0	0	0	0	0	0	0	0	0	0	0	0	0	0	0	0	0	0	0	0	0	0	0	0	0	0	0
Greece	GRC	0	0	0	0	0	0	0	0	0	0	0	0	0	0	0	0	0	0	0	0	0	0	0	0	0	0	0	0	0	0	0	0	0	0	0	0	0	0	0	0	0	0	0	0	0	0	0	0
Hungary	HUN	0	0	0	0	0	0	0	0	0	0	0	0	0	0	0	0	0	0	0	0	0	0	0	0	0	0	0	0	0	0	0	0	0	0	0	0	0	0	0	0	0	0	0	0	0	0	0	0
Iceland	ISL	0	0	0	0	0	0	0	0	0	0	0	0	0	0	0	0	0	0	0	0	0	0	0	0	0	0	0	0	0	0	0	0	0	0	0	0	0	0	0	0	0	0	0	0	0	0	0	0
Ireland	IRL	0	0	0	0	0	0	0	0	0	0	0	0	0	0	0	0	0	0	0	0	0	0	0	0	0	0	0	0	0	0	0	0	0	0	0	0	0	0	0	0	0	0	0	0	0	0	0	0
Italy	ITA	0	0	0	0	0	0	0	0	0	0	0	0	0	0	0	0	0	0	0	0	0	0	0	0	0	0	0	0	0	0	0	0	0	0	0	0	0	0	0	0	0	0	0	0	0	0	0	0
Japan	JPN	0	0	0	0	0	0	0	0	0	0	0	0	0	0	0	0	0	0	0	0	0	0	0	0	0	0	0	0	0	0	0	0	0	0	0	0	0	0	0	0	0	0	0	0	0	0	0	64736
Kazakhstan	KAZ	0	0	0	0	0	0	0	0	0	0	0	0	0	0	0	0	0	0	0	0	0	0	0	0	0	0	0	0	0	0	0	0	0	0	0	0	0	0	0	0	0	0	0	0	0	0	0	0
Latvia	LVA	0	0	0	0	0	0	0	0	0	0	0	0	0	0	0	0	0	0	0	0	0	0	0	0	0	0	0	0	0	0	0	0	0	0	0	0	0	0	0	0	0	0	0	0	0	0	0	0
Lithuania	LTU	0	0	0	0	0	0	0	0	0	0	0	0	0	0	0	0	0	0	0	0	0	0	0	0	0	0	0	0	0	0	0	0	0	0	0	0	0	0	0	0	0	0	0	0	0	0	0	0
Luxembourg	LUX	0	0	0	0	0	0	0	0	0	0	0	0	0	0	0	0	0	0	0	0	0	0	0	0	0	0	0	0	0	0	0	0	0	0	0	0	0	0	0	0	0	0	0	0	0	0	0	0
Netherlands	NLD	0	0	0	0	0	0	0	0	0	0	0	0	0	0	0	0	0	0	0	0	0	0	0	0	0	0	0	0	0	0	0	0	0	0	0	0	0	0	0	0	0	0	0	0	0	0	0	0
New Zealand	NZL
Norway	NOR	0	0	0	0	0	0	0	0	0	0	0	0	0	0	0	0	0	0	0	0	0	0	0	0	0	0	0	0	0	0	0	0	0	0	0	0	0	0	0	0	0	0	0	0	0	0	0	0
Poland	POL	0	0	0	0	0	0	0	0	0	0	0	0	0	0	0	0	0	0	0	0	0	0	0	0	0	0	0	0	0	0	0	0	0	0	0	0	0	0	0	0	0	0	0	0	0	0	0	0
Portugal	PRT
Romania	ROU	0	0	0	0	0	0	0	0	0	0	0	0	0	0	0	0	0	0	0	0	0	0	0	0	0	0	0	0	0	0	0	0	0	0	0	0	0	0	0	0	0	0	0	0	0	0	0	0
Russia	RUS	0	0	0	0	0	0	0	0	0	0	0	0	0	0	0	0	0	0	0	0	0	0	0	0	0	0	0	0	0	0	0	0	0	0	0	0	0	0	0	0	0	0	0	0	0	0	0	0
Slovakia	SVK	0	0	0	0	0	0	0	0	0	0	0	0	0	0	0	0	0	0	0	0	0	0	0	0	0	0	0	0	0	0	0	0	0	0	0	0	0	0	0	0	0	0	0	0	0	0	0	0
Slovenia	SVN	0	0	0	0	0	0	0	0	0	0	0	0	0	0	0	0	0	0	0	0	0	0	0	0	0	0	0	0	0	0	0	0	0	0	0	0	0	0	0	0	0	0	0	0	0	0	0	0
Spain	ESP	0	0	0	0	0	0	0	0	0	0	0	0	0	0	0	0	0	0	0	0	0	0	0	0	0	0	0	0	0	0	0	0	0	0	0	0	0	0	0	0	0	0	0	0	0	0	0	0
Sweden	SWE	0	0	0	0	0	0	0	0	0	0	0	0	0	0	0	0	0	0	0	0	0	0	0	0	0	0	0	0	0	0	0	0	0	0	0	0	0	0	0	0	0	0	0	0	0	0	0	0
Switzerland	CHE	0	0	0	0	0	0	0	0	0	0	0	0	0	0	0	0	0	0	0	0	0	0	0	0	0	0	0	0	0	0	0	0	0	0	0	0	0	0	0	0	0	0	0	0	0	0	0	0
Turkey	TUR	0	0	0	0	0	0	0	0	0	0	0	0	0	0	0	0	0	0	0	0	0	0	0	0	0	0	0	0	0	0	0	0	0	0	0	0	0	0	0	0	0	0	0	0	0	0	0	0
Ukraine	UKR	0	0	0	0	0	0	0	0	0	0	0	0	0	0	0	0	0	0	0	0	0	0	0	0	0	0	0	0	0	0	0	0	0	0	0	0	0	0	0	0	0	0	0	0	0	0	0	0
United Kingdom	GBR	0	0	0	0	0	0	0	0	0	0	0	0	0	0	0	0	0	0	0	0	0	0	0	0	0	0	0	0	0	0	0	0	0	0	0	0	0	0	0	0	0	0	0	0	0	0	0	0
USA	USA	29631	28821	27457	20775	12792	10738	13261	12847	19123	19927	17757.2	20742.4	22195.8	27907	30915.3	23142.4	15436.3	17516.1	28162.4	31995.7	35396.8	36109	38678.5	42361	42774.1	45206	46377.8	51092.8	54564.8	51903.4	53349.5	58108.3	55348.7	55157.8	57425.1	60416.9	63473.9	63991	66447	64566	67883	68608	67122.6	68248.2	70196.5	70952.9	70740.1	58548.9
Mexico	MEX
Brazil	BRA	0	0	0	0	0	0	0	0	0	0	0	0	0	0	0	0	0	0	0	0	0	0	0	0	0	0	0	0	0	0	0	0	0	0	0	0	0	0	0	0	0	0	0	0	0	0	0	0
Egypt	EGY	0	0	0	0	0	0	0	0	0	0	0	0	0	0	0	0	0	0	0	0	0	0	0	0	0	0	0	0	0	0	0	0	0	0	0	0	0	0	0	0	0	0	0	0	0	0	0	0
Iran	IRN
Saudi Arabia	SAU	0	0	0	0	0	0	0	0	0	0	0	0	0	0	0	0	0	0	0	0	0	0	0	0	0	0	0	0	0	0	0	0	0	0	0	0	0	0	0	0	0	0	0	0	0	0	0	0
India	IND
China	CHN	0	0	0	0	0	0	0	0	0	0	0	0	0	0	0	0	0	0	0	0	0	0	0	0	0	0	0	0	0	0	0	0	0	0	0	0	0	0	0	0	0	0	0	0	0	0	0	0
South Korea	KOR	0	0	0	0	0	0	0	0	0	0	0	0	0	0	0	0	0	0	0	0	0	0	0	0	0	0	0	0	0	0	0	0	0	0	0	0	0	0	0	0	0	0	0	0	0	0	0	0
Vietnam	VNM
Indonesia	IDN
Source：The Global Carbon Project CEMent-process emissions dataset (https://zenodo.org/records/17287474)
[truncated: 49 more columns]

## Sheet: Data6
Data5: Clinker import from 1928 to 2024 in 50 coubtries and regions
Unit: kt
Countries	ISO	1928	1929	1930	1931	1932	1933	1934	1935	1936	1937	1938	1939	1940	1941	1942	1943	1944	1945	1946	1947	1948	1949	1950	1951	1952	1953	1954	1955	1956	1957	1958	1959	1960	1961	1962	1963	1964	1965	1966	1967	1968	1969	1970	1971	1972	1973	1974	1975
Australia	AUS	0	0	0	0	0	0	0	0	0	0	0	0	0	0	0	0	0	0	0	0	0	0	0	0	0	0	0	0	0	0	0	0	0	0	0	0	0	0	0	0	0	0	0	0	0	0	0	0
Austria	AUT	0	0	0	0	0	0	0	0	0	0	0	0	0	0	0	0	0	0	0	0	0	0	0	0	0	0	0	0	0	0	0	0	0	0	0	0	0	0	0	0	0	0	0	0	0	0	0	0
Belarus	BLR	0	0	0	0	0	0	0	0	0	0	0	0	0	0	0	0	0	0	0	0	0	0	0	0	0	0	0	0	0	0	0	0	0	0	0	0	0	0	0	0	0	0	0	0	0	0	0	0
Belgium	BEL	0	0	0	0	0	0	0	0	0	0	0	0	0	0	0	0	0	0	0	0	0	0	0	0	0	0	0	0	0	0	0	0	0	0	0	0	0	0	0	0	0	0	0	0	0	0	0	0
Bulgaria	BGR	0	0	0	0	0	0	0	0	0	0	0	0	0	0	0	0	0	0	0	0	0	0	0	0	0	0	0	0	0	0	0	0	0	0	0	0	0	0	0	0	0	0	0	0	0	0	0	0
Canada	CAN	0	0	0	0	0	0	0	0	0	0	0	0	0	0	0	0	0	0	0	0	0	0	0	0	0	0	0	0	0	0	0	0	0	0	0	0	0	0	0	0	0	0	0	0	0	0	0	0
Croatia	HRV	0	0	0	0	0	0	0	0	0	0	0	0	0	0	0	0	0	0	0	0	0	0	0	0	0	0	0	0	0	0	0	0	0	0	0	0	0	0	0	0	0	0	0	0	0	0	0	0
Cyprus	CYP	0	0	0	0	0	0	0	0	0	0	0	0	0	0	0	0	0	0	0	0	0	0	0	0	0	0	0	0	0	0	0	0	0	0	0	0	0	0	0	0	0	0	0	0	0	0	0	0
Czechia	CZE	0	0	0	0	0	0	0	0	0	0	0	0	0	0	0	0	0	0	0	0	0	0	0	0	0	0	0	0	0	0	0	0	0	0	0	0	0	0	0	0	0	0	0	0	0	0	0	0
Denmark	DNK	0	0	0	0	0	0	0	0	0	0	0	0	0	0	0	0	0	0	0	0	0	0	0	0	0	0	0	0	0	0	0	0	0	0	0	0	0	0	0	0	0	0	0	0	0	0	0	0
Estonia	EST	0	0	0	0	0	0	0	0	0	0	0	0	0	0	0	0	0	0	0	0	0	0	0	0	0	0	0	0	0	0	0	0	0	0	0	0	0	0	0	0	0	0	0	0	0	0	0	0
Finland	FIN	0	0	0	0	0	0	0	0	0	0	0	0	0	0	0	0	0	0	0	0	0	0	0	0	0	0	0	0	0	0	0	0	0	0	0	0	0	0	0	0	0	0	0	0	0	0	0	0
France	FRA	0	0	0	0	0	0	0	0	0	0	0	0	0	0	0	0	0	0	0	0	0	0	0	0	0	0	0	0	0	0	0	0	0	0	0	0	0	0	0	0	0	0	0	0	0	0	0	0
Germany	DEU	0	0	0	0	0	0	0	0	0	0	0	0	0	0	0	0	0	0	0	0	0	0	0	0	0	0	0	0	0	0	0	0	0	0	0	0	0	0	0	0	0	0	0	0	0	0	0	0
Greece	GRC	0	0	0	0	0	0	0	0	0	0	0	0	0	0	0	0	0	0	0	0	0	0	0	0	0	0	0	0	0	0	0	0	0	0	0	0	0	0	0	0	0	0	0	0	0	0	0	0
Hungary	HUN	0	0	0	0	0	0	0	0	0	0	0	0	0	0	0	0	0	0	0	0	0	0	0	0	0	0	0	0	0	0	0	0	0	0	0	0	0	0	0	0	0	0	0	0	0	0	0	0
Iceland	ISL	0	0	0	0	0	0	0	0	0	0	0	0	0	0	0	0	0	0	0	0	0	0	0	0	0	0	0	0	0	0	0	0	0	0	0	0	0	0	0	0	0	0	0	0	0	0	0	0
Ireland	IRL	0	0	0	0	0	0	0	0	0	0	0	0	0	0	0	0	0	0	0	0	0	0	0	0	0	0	0	0	0	0	0	0	0	0	0	0	0	0	0	0	0	0	0	0	0	0	0	0
Italy	ITA	0	0	0	0	0	0	0	0	0	0	0	0	0	0	0	0	0	0	0	0	0	0	0	0	0	0	0	0	0	0	0	0	0	0	0	0	0	0	0	0	0	0	0	0	0	0	0	0
Japan	JPN	0	0	0	0	0	0	0	0	0	0	0	0	0	0	0	0	0	0	0	0	0	0	0	0	0	0	0	0	0	0	0	0	0	0	0	0	0	0	0	0	0	0	0	0	0	0	0	0
Kazakhstan	KAZ	0	0	0	0	0	0	0	0	0	0	0	0	0	0	0	0	0	0	0	0	0	0	0	0	0	0	0	0	0	0	0	0	0	0	0	0	0	0	0	0	0	0	0	0	0	0	0	0
Latvia	LVA	0	0	0	0	0	0	0	0	0	0	0	0	0	0	0	0	0	0	0	0	0	0	0	0	0	0	0	0	0	0	0	0	0	0	0	0	0	0	0	0	0	0	0	0	0	0	0	0
Lithuania	LTU	0	0	0	0	0	0	0	0	0	0	0	0	0	0	0	0	0	0	0	0	0	0	0	0	0	0	0	0	0	0	0	0	0	0	0	0	0	0	0	0	0	0	0	0	0	0	0	0
Luxembourg	LUX	0	0	0	0	0	0	0	0	0	0	0	0	0	0	0	0	0	0	0	0	0	0	0	0	0	0	0	0	0	0	0	0	0	0	0	0	0	0	0	0	0	0	0	0	0	0	0	0
Netherlands	NLD	0	0	0	0	0	0	0	0	0	0	0	0	0	0	0	0	0	0	0	0	0	0	0	0	0	0	0	0	0	0	0	0	0	0	0	0	0	0	0	0	0	0	0	0	0	0	0	0
New Zealand	NZL	0	0	0	0	0	0	0	0	0	0	0	0	0	0	0	0	0	0	0	0	0	0	0	0	0	0	0	0	0	0	0	0	0	0	0	0	0	0	0	0	0	0	0	0	0	0	0	0
Norway	NOR	0	0	0	0	0	0	0	0	0	0	0	0	0	0	0	0	0	0	0	0	0	0	0	0	0	0	0	0	0	0	0	0	0	0	0	0	0	0	0	0	0	0	0	0	0	0	0	0
Poland	POL	0	0	0	0	0	0	0	0	0	0	0	0	0	0	0	0	0	0	0	0	0	0	0	0	0	0	0	0	0	0	0	0	0	0	0	0	0	0	0	0	0	0	0	0	0	0	0	0
Portugal	PRT	0	0	0	0	0	0	0	0	0	0	0	0	0	0	0	0	0	0	0	0	0	0	0	0	0	0	0	0	0	0	0	0	0	0	0	0	0	0	0	0	0	0	0	0	0	0	0	0
Romania	ROU	0	0	0	0	0	0	0	0	0	0	0	0	0	0	0	0	0	0	0	0	0	0	0	0	0	0	0	0	0	0	0	0	0	0	0	0	0	0	0	0	0	0	0	0	0	0	0	0
Russia	RUS	0	0	0	0	0	0	0	0	0	0	0	0	0	0	0	0	0	0	0	0	0	0	0	0	0	0	0	0	0	0	0	0	0	0	0	0	0	0	0	0	0	0	0	0	0	0	0	0
Slovakia	SVK	0	0	0	0	0	0	0	0	0	0	0	0	0	0	0	0	0	0	0	0	0	0	0	0	0	0	0	0	0	0	0	0	0	0	0	0	0	0	0	0	0	0	0	0	0	0	0	0
Slovenia	SVN	0	0	0	0	0	0	0	0	0	0	0	0	0	0	0	0	0	0	0	0	0	0	0	0	0	0	0	0	0	0	0	0	0	0	0	0	0	0	0	0	0	0	0	0	0	0	0	0
Spain	ESP	0	0	0	0	0	0	0	0	0	0	0	0	0	0	0	0	0	0	0	0	0	0	0	0	0	0	0	0	0	0	0	0	0	0	0	0	0	0	0	0	0	0	0	0	0	0	0	0
Sweden	SWE	0	0	0	0	0	0	0	0	0	0	0	0	0	0	0	0	0	0	0	0	0	0	0	0	0	0	0	0	0	0	0	0	0	0	0	0	0	0	0	0	0	0	0	0	0	0	0	0
Switzerland	CHE	0	0	0	0	0	0	0	0	0	0	0	0	0	0	0	0	0	0	0	0	0	0	0	0	0	0	0	0	0	0	0	0	0	0	0	0	0	0	0	0	0	0	0	0	0	0	0	0
Turkey	TUR	0	0	0	0	0	0	0	0	0	0	0	0	0	0	0	0	0	0	0	0	0	0	0	0	0	0	0	0	0	0	0	0	0	0	0	0	0	0	0	0	0	0	0	0	0	0	0	0
Ukraine	UKR	0	0	0	0	0	0	0	0	0	0	0	0	0	0	0	0	0	0	0	0	0	0	0	0	0	0	0	0	0	0	0	0	0	0	0	0	0	0	0	0	0	0	0	0	0	0	0	0
United Kingdom	GBR	0	0	0	0	0	0	0	0	0	0	0	0	0	0	0	0	0	0	0	0	0	0	0	0	0	0	0	0	0	0	0	0	0	0	0	0	0	0	0	0	0	0	0	0	0	0	0	0
USA	USA	0	0	0	0	0	0	0	0	0	0	0	0	0	0	0	0	0	0	0	0	0	0	0	0	0	0	0	0	0	0	0	0	0	0	0	0	0	0	0	0	0	0	0	0	0	0	0	0
Mexico	MEX	0	0	0	0	0	0	0	0	0	0	0	0	0	0	0	0	0	0	0	0	0	0	0	0	0	0	0	0	0	0	0	0	0	0	0	0	0	0	0	0	0	0	0	0	0	0	0	0
Brazil	BRA	0	0	0	0	0	0	0	0	0	0	0	0	0	0	0	0	0	0	0	0	0	0	0	0	0	0	0	0	0	0	0	0	0	0	0	0	0	0	0	0	0	0	0	0	0	0	0	0
Egypt	EGY	0	0	0	0	0	0	0	0	0	0	0	0	0	0	0	0	0	0	0	0	0	0	0	0	0	0	0	0	0	0	0	0	0	0	0	0	0	0	0	0	0	0	0	0	0	0	0	0
Iran	IRN	0	0	0	0	0	0	0	0	0	0	0	0	0	0	0	0	0	0	0	0	0	0	0	0	0	0	0	0	0	0	0	0	0	0	0	0	0	0	0	0	0	0	0	0	0	0	0	0
Saudi Arabia	SAU	0	0	0	0	0	0	0	0	0	0	0	0	0	0	0	0	0	0	0	0	0	0	0	0	0	0	0	0	0	0	0	0	0	0	0	0	0	0	0	0	0	0	0	0	0	0	0	0
India	IND	0	0	0	0	0	0	0	0	0	0	0	0	0	0	0	0	0	0	0	0	0	0	0	0	0	0	0	0	0	0	0	0	0	0	0	0	0	0	0	0	0	0	0	0	0	0	0	0
China	CHN	0	0	0	0	0	0	0	0	0	0	0	0	0	0	0	0	0	0	0	0	0	0	0	0	0	0	0	0	0	0	0	0	0	0	0	0	0	0	0	0	0	0	0	0	0	0	0	0
South Korea	KOR	0	0	0	0	0	0	0	0	0	0	0	0	0	0	0	0	0	0	0	0	0	0	0	0	0	0	0	0	0	0	0	0	0	0	0	0	0	0	0	0	0	0	0	0	0	0	0	0
Vietnam	VNM	0	0	0	0	0	0	0	0	0	0	0	0	0	0	0	0	0	0	0	0	0	0	0	0	0	0	0	0	0	0	0	0	0	0	0	0	0	0	0	0	0	0	0	0	0	0	0	0
Indonesia	IDN	0	0	0	0	0	0	0	0	0	0	0	0	0	0	0	0	0	0	0	0	0	0	0	0	0	0	0	0	0	0	0	0	0	0	0	0	0	0	0	0	0	0	0	0	0	0	0	0
Source: UN Comtrade Database. https://comtradeplus.un.org/.
[truncated: 49 more columns]

## Sheet: Data7
Data6: Clinker export from 1928 to 2024 in 50 coubtries and regions
Unit: kt
Countries	ISO	1928	1929	1930	1931	1932	1933	1934	1935	1936	1937	1938	1939	1940	1941	1942	1943	1944	1945	1946	1947	1948	1949	1950	1951	1952	1953	1954	1955	1956	1957	1958	1959	1960	1961	1962	1963	1964	1965	1966	1967	1968	1969	1970	1971	1972	1973	1974	1975
Australia	AUS	0	0	0	0	0	0	0	0	0	0	0	0	0	0	0	0	0	0	0	0	0	0	0	0	0	0	0	0	0	0	0	0	0	0	0	0	0	0	0	0	0	0	0	0	0	0	0	0
Austria	AUT	0	0	0	0	0	0	0	0	0	0	0	0	0	0	0	0	0	0	0	0	0	0	0	0	0	0	0	0	0	0	0	0	0	0	0	0	0	0	0	0	0	0	0	0	0	0	0	0
Belarus	BLR	0	0	0	0	0	0	0	0	0	0	0	0	0	0	0	0	0	0	0	0	0	0	0	0	0	0	0	0	0	0	0	0	0	0	0	0	0	0	0	0	0	0	0	0	0	0	0	0
Belgium	BEL	0	0	0	0	0	0	0	0	0	0	0	0	0	0	0	0	0	0	0	0	0	0	0	0	0	0	0	0	0	0	0	0	0	0	0	0	0	0	0	0	0	0	0	0	0	0	0	0
Bulgaria	BGR	0	0	0	0	0	0	0	0	0	0	0	0	0	0	0	0	0	0	0	0	0	0	0	0	0	0	0	0	0	0	0	0	0	0	0	0	0	0	0	0	0	0	0	0	0	0	0	0
Canada	CAN	0	0	0	0	0	0	0	0	0	0	0	0	0	0	0	0	0	0	0	0	0	0	0	0	0	0	0	0	0	0	0	0	0	0	0	0	0	0	0	0	0	0	0	0	0	0	0	0
Croatia	HRV	0	0	0	0	0	0	0	0	0	0	0	0	0	0	0	0	0	0	0	0	0	0	0	0	0	0	0	0	0	0	0	0	0	0	0	0	0	0	0	0	0	0	0	0	0	0	0	0
Cyprus	CYP	0	0	0	0	0	0	0	0	0	0	0	0	0	0	0	0	0	0	0	0	0	0	0	0	0	0	0	0	0	0	0	0	0	0	0	0	0	0	0	0	0	0	0	0	0	0	0	0
Czechia	CZE	0	0	0	0	0	0	0	0	0	0	0	0	0	0	0	0	0	0	0	0	0	0	0	0	0	0	0	0	0	0	0	0	0	0	0	0	0	0	0	0	0	0	0	0	0	0	0	0
Denmark	DNK	0	0	0	0	0	0	0	0	0	0	0	0	0	0	0	0	0	0	0	0	0	0	0	0	0	0	0	0	0	0	0	0	0	0	0	0	0	0	0	0	0	0	0	0	0	0	0	0
Estonia	EST	0	0	0	0	0	0	0	0	0	0	0	0	0	0	0	0	0	0	0	0	0	0	0	0	0	0	0	0	0	0	0	0	0	0	0	0	0	0	0	0	0	0	0	0	0	0	0	0
Finland	FIN	0	0	0	0	0	0	0	0	0	0	0	0	0	0	0	0	0	0	0	0	0	0	0	0	0	0	0	0	0	0	0	0	0	0	0	0	0	0	0	0	0	0	0	0	0	0	0	0
France	FRA	0	0	0	0	0	0	0	0	0	0	0	0	0	0	0	0	0	0	0	0	0	0	0	0	0	0	0	0	0	0	0	0	0	0	0	0	0	0	0	0	0	0	0	0	0	0	0	0
Germany	DEU	0	0	0	0	0	0	0	0	0	0	0	0	0	0	0	0	0	0	0	0	0	0	0	0	0	0	0	0	0	0	0	0	0	0	0	0	0	0	0	0	0	0	0	0	0	0	0	0
Greece	GRC	0	0	0	0	0	0	0	0	0	0	0	0	0	0	0	0	0	0	0	0	0	0	0	0	0	0	0	0	0	0	0	0	0	0	0	0	0	0	0	0	0	0	0	0	0	0	0	0
Hungary	HUN	0	0	0	0	0	0	0	0	0	0	0	0	0	0	0	0	0	0	0	0	0	0	0	0	0	0	0	0	0	0	0	0	0	0	0	0	0	0	0	0	0	0	0	0	0	0	0	0
Iceland	ISL	0	0	0	0	0	0	0	0	0	0	0	0	0	0	0	0	0	0	0	0	0	0	0	0	0	0	0	0	0	0	0	0	0	0	0	0	0	0	0	0	0	0	0	0	0	0	0	0
Ireland	IRL	0	0	0	0	0	0	0	0	0	0	0	0	0	0	0	0	0	0	0	0	0	0	0	0	0	0	0	0	0	0	0	0	0	0	0	0	0	0	0	0	0	0	0	0	0	0	0	0
Italy	ITA	0	0	0	0	0	0	0	0	0	0	0	0	0	0	0	0	0	0	0	0	0	0	0	0	0	0	0	0	0	0	0	0	0	0	0	0	0	0	0	0	0	0	0	0	0	0	0	0
Japan	JPN	0	0	0	0	0	0	0	0	0	0	0	0	0	0	0	0	0	0	0	0	0	0	0	0	0	0	0	0	0	0	0	0	0	0	0	0	0	0	0	0	0	0	0	0	0	0	0	0
Kazakhstan	KAZ	0	0	0	0	0	0	0	0	0	0	0	0	0	0	0	0	0	0	0	0	0	0	0	0	0	0	0	0	0	0	0	0	0	0	0	0	0	0	0	0	0	0	0	0	0	0	0	0
Latvia	LVA	0	0	0	0	0	0	0	0	0	0	0	0	0	0	0	0	0	0	0	0	0	0	0	0	0	0	0	0	0	0	0	0	0	0	0	0	0	0	0	0	0	0	0	0	0	0	0	0
Lithuania	LTU	0	0	0	0	0	0	0	0	0	0	0	0	0	0	0	0	0	0	0	0	0	0	0	0	0	0	0	0	0	0	0	0	0	0	0	0	0	0	0	0	0	0	0	0	0	0	0	0
Luxembourg	LUX	0	0	0	0	0	0	0	0	0	0	0	0	0	0	0	0	0	0	0	0	0	0	0	0	0	0	0	0	0	0	0	0	0	0	0	0	0	0	0	0	0	0	0	0	0	0	0	0
Netherlands	NLD	0	0	0	0	0	0	0	0	0	0	0	0	0	0	0	0	0	0	0	0	0	0	0	0	0	0	0	0	0	0	0	0	0	0	0	0	0	0	0	0	0	0	0	0	0	0	0	0
New Zealand	NZL	0	0	0	0	0	0	0	0	0	0	0	0	0	0	0	0	0	0	0	0	0	0	0	0	0	0	0	0	0	0	0	0	0	0	0	0	0	0	0	0	0	0	0	0	0	0	0	0
Norway	NOR	0	0	0	0	0	0	0	0	0	0	0	0	0	0	0	0	0	0	0	0	0	0	0	0	0	0	0	0	0	0	0	0	0	0	0	0	0	0	0	0	0	0	0	0	0	0	0	0
Poland	POL	0	0	0	0	0	0	0	0	0	0	0	0	0	0	0	0	0	0	0	0	0	0	0	0	0	0	0	0	0	0	0	0	0	0	0	0	0	0	0	0	0	0	0	0	0	0	0	0
Portugal	PRT	0	0	0	0	0	0	0	0	0	0	0	0	0	0	0	0	0	0	0	0	0	0	0	0	0	0	0	0	0	0	0	0	0	0	0	0	0	0	0	0	0	0	0	0	0	0	0	0
Romania	ROU	0	0	0	0	0	0	0	0	0	0	0	0	0	0	0	0	0	0	0	0	0	0	0	0	0	0	0	0	0	0	0	0	0	0	0	0	0	0	0	0	0	0	0	0	0	0	0	0
Russia	RUS	0	0	0	0	0	0	0	0	0	0	0	0	0	0	0	0	0	0	0	0	0	0	0	0	0	0	0	0	0	0	0	0	0	0	0	0	0	0	0	0	0	0	0	0	0	0	0	0
Slovakia	SVK	0	0	0	0	0	0	0	0	0	0	0	0	0	0	0	0	0	0	0	0	0	0	0	0	0	0	0	0	0	0	0	0	0	0	0	0	0	0	0	0	0	0	0	0	0	0	0	0
Slovenia	SVN	0	0	0	0	0	0	0	0	0	0	0	0	0	0	0	0	0	0	0	0	0	0	0	0	0	0	0	0	0	0	0	0	0	0	0	0	0	0	0	0	0	0	0	0	0	0	0	0
Spain	ESP	0	0	0	0	0	0	0	0	0	0	0	0	0	0	0	0	0	0	0	0	0	0	0	0	0	0	0	0	0	0	0	0	0	0	0	0	0	0	0	0	0	0	0	0	0	0	0	0
Sweden	SWE	0	0	0	0	0	0	0	0	0	0	0	0	0	0	0	0	0	0	0	0	0	0	0	0	0	0	0	0	0	0	0	0	0	0	0	0	0	0	0	0	0	0	0	0	0	0	0	0
Switzerland	CHE	0	0	0	0	0	0	0	0	0	0	0	0	0	0	0	0	0	0	0	0	0	0	0	0	0	0	0	0	0	0	0	0	0	0	0	0	0	0	0	0	0	0	0	0	0	0	0	0
Turkey	TUR	0	0	0	0	0	0	0	0	0	0	0	0	0	0	0	0	0	0	0	0	0	0	0	0	0	0	0	0	0	0	0	0	0	0	0	0	0	0	0	0	0	0	0	0	0	0	0	0
Ukraine	UKR	0	0	0	0	0	0	0	0	0	0	0	0	0	0	0	0	0	0	0	0	0	0	0	0	0	0	0	0	0	0	0	0	0	0	0	0	0	0	0	0	0	0	0	0	0	0	0	0
United Kingdom	GBR	0	0	0	0	0	0	0	0	0	0	0	0	0	0	0	0	0	0	0	0	0	0	0	0	0	0	0	0	0	0	0	0	0	0	0	0	0	0	0	0	0	0	0	0	0	0	0	0
USA	USA	0	0	0	0	0	0	0	0	0	0	0	0	0	0	0	0	0	0	0	0	0	0	0	0	0	0	0	0	0	0	0	0	0	0	0	0	0	0	0	0	0	0	0	0	0	0	0	0
Mexico	MEX	0	0	0	0	0	0	0	0	0	0	0	0	0	0	0	0	0	0	0	0	0	0	0	0	0	0	0	0	0	0	0	0	0	0	0	0	0	0	0	0	0	0	0	0	0	0	0	0
Brazil	BRA	0	0	0	0	0	0	0	0	0	0	0	0	0	0	0	0	0	0	0	0	0	0	0	0	0	0	0	0	0	0	0	0	0	0	0	0	0	0	0	0	0	0	0	0	0	0	0	0
Egypt	EGY	0	0	0	0	0	0	0	0	0	0	0	0	0	0	0	0	0	0	0	0	0	0	0	0	0	0	0	0	0	0	0	0	0	0	0	0	0	0	0	0	0	0	0	0	0	0	0	0
Iran	IRN	0	0	0	0	0	0	0	0	0	0	0	0	0	0	0	0	0	0	0	0	0	0	0	0	0	0	0	0	0	0	0	0	0	0	0	0	0	0	0	0	0	0	0	0	0	0	0	0
Saudi Arabia	SAU	0	0	0	0	0	0	0	0	0	0	0	0	0	0	0	0	0	0	0	0	0	0	0	0	0	0	0	0	0	0	0	0	0	0	0	0	0	0	0	0	0	0	0	0	0	0	0	0
India	IND	0	0	0	0	0	0	0	0	0	0	0	0	0	0	0	0	0	0	0	0	0	0	0	0	0	0	0	0	0	0	0	0	0	0	0	0	0	0	0	0	0	0	0	0	0	0	0	0
China	CHN	0	0	0	0	0	0	0	0	0	0	0	0	0	0	0	0	0	0	0	0	0	0	0	0	0	0	0	0	0	0	0	0	0	0	0	0	0	0	0	0	0	0	0	0	0	0	0	0
South Korea	KOR	0	0	0	0	0	0	0	0	0	0	0	0	0	0	0	0	0	0	0	0	0	0	0	0	0	0	0	0	0	0	0	0	0	0	0	0	0	0	0	0	0	0	0	0	0	0	0	0
Vietnam	VNM	0	0	0	0	0	0	0	0	0	0	0	0	0	0	0	0	0	0	0	0	0	0	0	0	0	0	0	0	0	0	0	0	0	0	0	0	0	0	0	0	0	0	0	0	0	0	0	0
Indonesia	IDN	0	0	0	0	0	0	0	0	0	0	0	0	0	0	0	0	0	0	0	0	0	0	0	0	0	0	0	0	0	0	0	0	0	0	0	0	0	0	0	0	0	0	0	0	0	0	0	0
Source: UN Comtrade Database. https://comtradeplus.un.org/.
[truncated: 49 more columns]
