# Supplementary material for: A framework for integrating cement carbonation sink into national greenhouse gas inventories
Source: Research Square preprint supplement (doi:10.21203/rs.3.rs-8587414/v1), 2026-01-29
Supplement: Supplementary file 1 [file b2a8cc287fd950a007275431.pdf]

1 **Supplementary Information for:**  
2 **A framework for integrating cement carbonation sink into national greenhouse gas inventories**  
3 Le Niu<sup>1,2</sup>, Fengming Xi<sup>1,3,7\*</sup>, Robbie M. Andrew<sup>4</sup>, Songbin Wu<sup>2,5</sup>, Jianwei Xu<sup>3,6</sup>, Jiaoyue Wang<sup>1,7\*</sup>,  
4 Jiajie Li<sup>3</sup>, Wei Gu<sup>8</sup>, Xin Zhao<sup>6</sup>, Wenping Yuan<sup>9</sup>, Shilong Piao<sup>9</sup>, Anlin Shao<sup>3</sup>.  
5 <sup>1</sup> CAS Key Laboratory of Forest Ecology and Silviculture, Institute of Applied Ecology, Chinese  
6 Academy of Sciences, Shenyang 110016, China  
7 <sup>2</sup> College of Resources and Environment, University of Chinese Academy of Sciences, Beijing,  
8 100049, China  
9 <sup>3</sup> Institute of Mineral Resources, University of Science and Technology Beijing, Beijing, 100083,  
10 China  
11 <sup>4</sup> CICERO Center for International Climate Research, Oslo 0349, Norway  
12 <sup>5</sup> Institute of Urban Environment, Chinese Academy of Sciences, Xiamen 361021, China  
13 <sup>6</sup> School of Computer & Communication Engineering, University of Science and Technology  
14 Beijing, Beijing, 100083, China  
15 <sup>7</sup> Key Laboratory of Terrestrial Ecosystem Carbon Neutrality, Liaoning Province, Shenyang, 110016,  
16 China  
17 <sup>8</sup> School of Economics and Management, University of Science and Technology Beijing, Beijing,  
18 100083, China  
19 <sup>9</sup> Institute of Carbon Neutrality, Peking University, Beijing, 100871, China

20  
21  
22  
23  
24  
25  
26  
27  
28  
29  
30  
31  
32  
33  
34  
35  
36  
37  
38  
39  
40

**Content**

Supplementary Note 1: Countries covered in this study .....3

Supplementary Note 2: The activity data in the Tier 1 and Tier 2 method.....4

Supplementary Note 3: Global default absorption factors of cement carbonation in the Tier 1  
method .....5

3.1 Global default carbon absorption factors in Tier 1A. ....5

3.2 Global default carbon absorption factors in Tier 1B.....5

Supplementary Note 4: The parameters for national absorption factors of cement carbonation in  
the Tier 2 method..... 11

4.1 Global Parameters ..... 12

4.1.1 CaO/MgO content in cement ..... 12

4.1.2 Proportion of CaO converted to CaCO<sub>3</sub>..... 12

4.2 Local parameters ..... 12

4.2.1 Input parameters in cement production stage ..... 12

4.2.2 Input parameters in construction stage ..... 13

4.2.3 Input parameters in service life stage..... 14

4.2.4 Input parameters in demolition stage..... 18

Supplementary Note 5: Comparison of annual cement carbonation sink derived from different  
activity data time spans.....20

Reference .....22

## Supplementary Note 1: Countries covered in this study

This study focuses on major cement consumption countries and the Annex I countries defined under UNFCCC. There are 14 major cement consumption countries for which cement production data are recorded annually by the United States Geological Survey (USGS)<sup>1</sup>, including the United States of America, Brazil, China, Egypt, India, Indonesia, Iran, Japan, South Korea, Mexico, Russia, Saudi Arabia, Turkey, and Vietnam. The Annex I countries comprise 44 parties, and they are required to submit their national GHGs inventory reports in common reporting format tables every year, with consistent and high-quality time-series cement process emissions data. Among the 44 Annex I parties, the European Union is not a sovereign state and does not report cement-related data as a separate entity, Monaco's emissions have been combined with those of France, and Malta and Liechtenstein do not have domestic cement producer, so these four parties were excluded. Therefore, the final dataset comprises 50 countries in this study, the other 36 countries are: Australia, Austria, Belarus, Belgium, Bulgaria, Canada, Croatia, Cyprus, Czechia, Denmark, Estonia, Finland, France, Germany, Greece, Hungary, Iceland, Ireland, Italy, Kazakhstan, Latvia, Lithuania, Luxembourg, Netherlands, New Zealand, Norway, Poland, Portugal, Romania, Slovakia, , Slovenia, Spain, Sweden, Switzerland, Turkey, Ukraine, and the United Kingdom. As shown in the Figure S1, the 50 countries coverage in this study account for 88% global cement consumption.

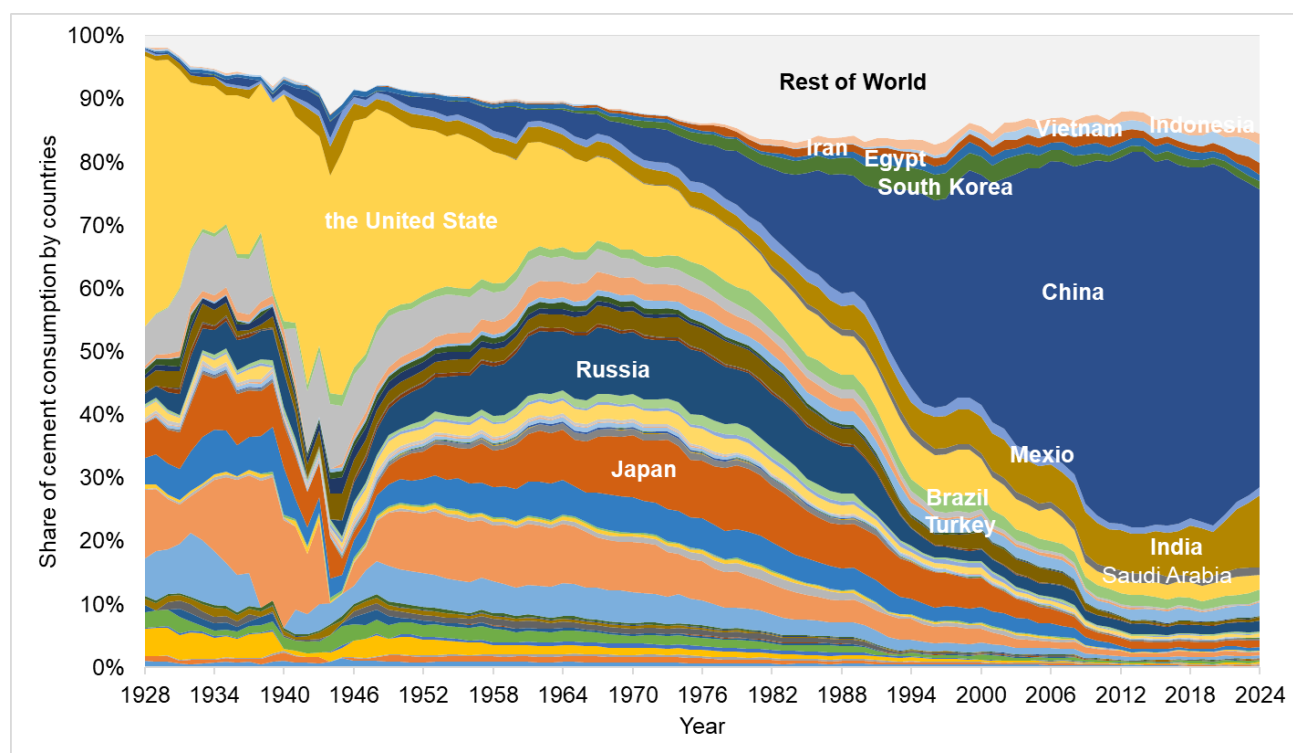

**Fig. S1:** Share of cement consumption by 50 countries. The map highlights 14 major consumer countries (77% global cement consumption). Detailed data see in Source Data.

## Supplementary Note 2: The activity data in the Tier 1 and Tier 2 method

In the cement production stage, clinker production in reporting year is the activity data, the data should prioritize official statistics or industry associations. If clinker production data is unavailable, it can be calculated using the cement clinker ratio relative to cement production as following:

$$P_{clinker,y} = P_{cement,y} \times CKR_y$$

Where  $P_{clinker,y}$  is clinker production in reporting year  $y$ ,  $P_{cement,y}$  is the cement production in reporting year  $y$ ,  $CKR_y$  is the clinker-to-cement ratios in year  $y$ , which defined as the mass ratio of clinker consumption to cement production.

In the cement service life, demolition, and disposal stages, the activity data is the time-series of cement consumption ( $c_1, \dots, c_j, \dots, c_y$ ), corrected by clinker fraction:

$$AD = C_{cement} \times F_{clinker}$$

$AD$  is the activity data,  $C_{cement}$  is the cement consumption,  $F_{clinker}$  is the clinker fraction in cement materials.

Cement consumption can be estimated based on the cement production and trade data as following:

$$C_{cement,y} = P_{cement,y} + Im_{cement,y} - Ex_{cement,y}$$

Where  $C_{cement,y}$  is the cement consumption in reporting year  $y$ ,  $P_{cement,y}$  is the cement production in year  $y$ ,  $Im_{cement,y}$  and  $Ex_{cement,y}$  are the imports and exports of cement in year  $y$ .

$F_{clinker}$  is suggested to adopt a global default value of 0.95<sup>2,3</sup>. If  $F_{clinker}$  is not statistically analyzed, it can be replaced by the clinker-to-cement ratios. We employed linear interpolation<sup>3</sup> to reconstruct historical clinker-to-cement ratios.

The source of activity data in 50 countries can be obtained in source data, and the activity data are in Supplementary Table1.

85 **Supplementary Note 3: Global default absorption factors of cement carbonation in the Tier 1**  
86 **method**

87 **3.1 Global default carbon absorption factors in Tier 1A.**

88 In the Tier 1 method, the global average absorption factors of cement carbonation (Fig. S2) were used  
89 as default absorption factors. It is derived from the weighted average of cement carbon absorption  
90 factors across 50 countries with the weights determined by cement consumption.

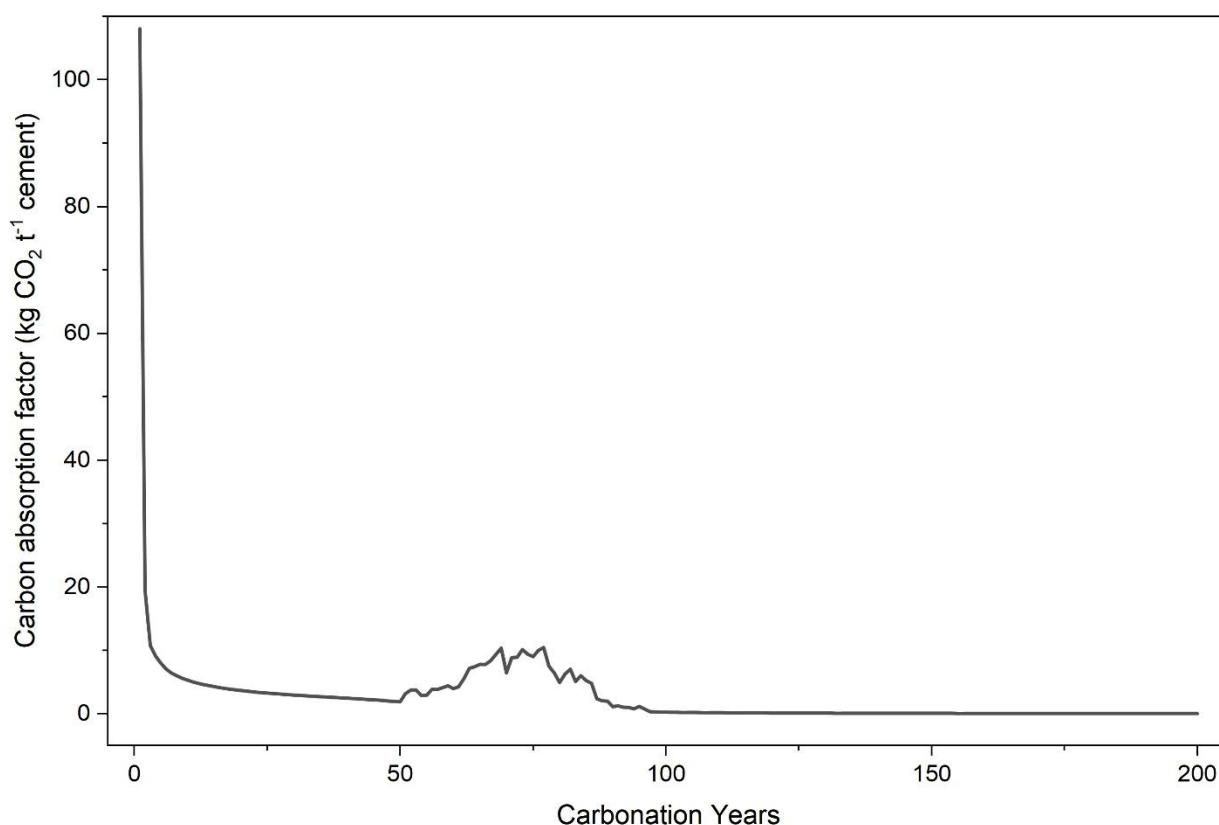

91  
92 **Fig. S2:** Global default carbon absorption factor curves.

93 **3.2 Global default carbon absorption factors in Tier 1B.**

94 Principal component analysis (PCA) was applied to the five key parameters comprising 18 variables  
95 to explore the dominant structural differences among 50 countries. The analysis indicates that the  
96 parameter space can be effectively represented by two principal components, which explain 43.3%  
97 and 28.6% of the total variance, respectively. Together, the first two principal components account for  
98 71.9% of the total variance, capturing the dominant inter-country differences. Higher-order  
99 components each explain less than 10% of the variance and were therefore not considered in the main  
100 analysis.

The principal component loading matrix is presented in Table S1. The first principal component (PC1) is characterized by high positive loadings on the four particle-size distributions associated with RCA for new cement concrete, as well as on building lifespan, the third concrete strength class, and the proportion of cement used for concrete. In contrast, the particle-size distributions associated with landfill and stacking exhibit strong negative loadings on PC1. This component therefore represents a gradient from landfill-dominated disposal pathways toward intensive recycling into new cement concrete combined with longer building lifespans and higher concrete use intensity. The second principal component (PC2) shows high positive loadings on the particle-size distributions related to RCA for road base materials, while the particle-size distributions associated with landfill and stacking remain negatively loaded. PC2 thus captures the differentiation between road-base-oriented recycling pathways and landfilling practices.

**Table S1.** Principal component loading matrix

| Carbonation parameters                  |         | Variables    | PC1      | PC2      |
|-----------------------------------------|---------|--------------|----------|----------|
| Proportion of cement used for concrete  |         | Cement_share | 0.207183 | 0.049206 |
| Distribution of concrete strength class | <C15    | strength_1   | -0.09287 | -0.13692 |
|                                         | C16-C23 | strength_2   | -0.34776 | -0.01134 |
|                                         | C24-C35 | strength_3   | 0.501042 | 0.134247 |
|                                         | >C35    | strength_4   | -0.22113 | -0.13134 |
| Building lifespan                       |         | lifespan     | 0.696594 | -0.1729  |
| RCA for new cement concrete             | <5mm    | d1_g1        | 0.996141 | -0.0778  |
|                                         | 5-10mm  | d1_g2        | 0.980302 | -0.06474 |
|                                         | 10-20mm | d1_g3        | 0.99974  | -0.07341 |
|                                         | 20-32mm | d1_g4        | 0.999272 | -0.07274 |
| RCA for Road base materials and others  | <1mm    | d2_g1        | -0.32822 | 0.930131 |
|                                         | 1-10mm  | d2_g2        | -0.36628 | 0.938027 |
|                                         | 10-30mm | d2_g3        | -0.37677 | 0.934331 |
|                                         | >30mm   | d2_g4        | -0.37974 | 0.93257  |
| Landfill and Stacking                   | <10mm   | d3_g1        | -0.75776 | -0.6603  |
|                                         | 10-30mm | d3_g2        | -0.75763 | -0.66044 |
|                                         | 30-50mm | d3_g3        | -0.75777 | -0.66028 |
|                                         | >50mm   | d3_g4        | -0.75772 | -0.66035 |

Based on the principal component scores of the 50 countries, hierarchical clustering was first performed to explore the grouping structure. The dendrogram and agglomeration schedule suggest the presence of three distinct clusters (Fig. S3). To further validate the robustness of the clustering solution, K-means clustering was applied to the same principal component scores, and the results consistently indicate that three clusters provide the optimal partition of the countries (Fig. S4).

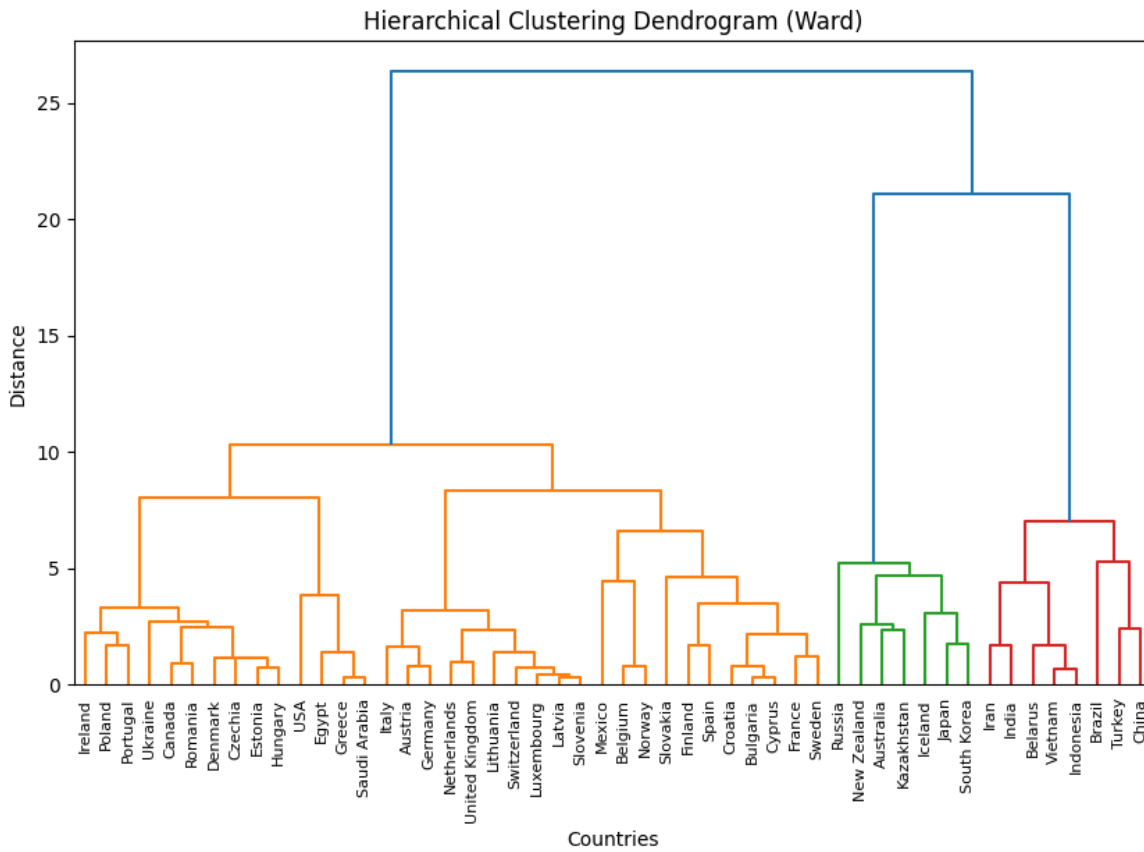

**Fig. S3:** Hierarchical clustering dendrogram.

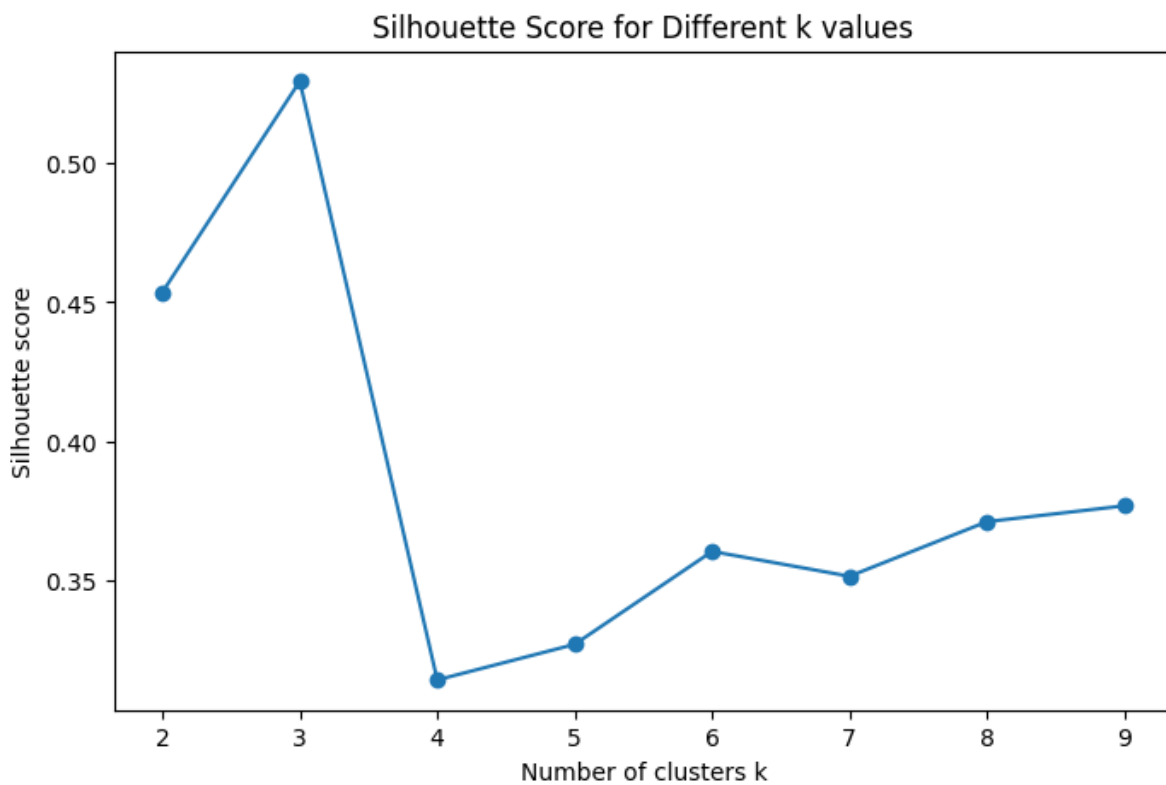

**Fig. S4:** Silhouette coefficients for K-means clustering results at each k value.

123 On this basis, the 50 countries were classified into three distinct groups (Fig. S5).

124 Group I, characterized by high PC1 scores, consists mainly of Europe and other industrialized regions,  
125 including Austria, Germany, France, the United Kingdom, the United States, and Canada, as well as  
126 several emerging economies such as Mexico, Egypt, and Saudi Arabia. These countries are dominated  
127 by recycling of waste concrete into new cement concrete (67.57%), generally exhibit finer particle-  
128 size distributions (mainly 11-20mm), longer building lifespans, and higher proportions of cement used  
129 for concrete.

130 Group II is characterized by low scores on both PC1 and PC2 and mainly includes developing countries  
131 such as China and India. In these countries, waste concrete is predominantly disposed of through  
132 landfill and stacking (93.19%), with coarser particle sizes (mainly >50mm), shorter building lifespans  
133 (50 years), and relatively lower proportions of cement used for concrete (67.85%).

134 Group III exhibits relatively low PC1 scores but high PC2 scores, indicating a disposal structure  
135 dominated by the use of waste concrete as road base materials (71.54%). These countries are generally  
136 associated with shorter building lifespans (45 years) and a concrete strength distribution concentrated  
137 in the C16-C23 strength class (42.69%).

138 **Table S2.** The countries included in the three categories

|                     | Group 1                                                                                                                                                                                                                                                                                                                                              | Group 2                                                         | Group 3                                                                 |
|---------------------|------------------------------------------------------------------------------------------------------------------------------------------------------------------------------------------------------------------------------------------------------------------------------------------------------------------------------------------------------|-----------------------------------------------------------------|-------------------------------------------------------------------------|
| Number of countries | 35                                                                                                                                                                                                                                                                                                                                                   | 8                                                               | 7                                                                       |
| Countries           | Austria, Belgium, Bulgaria, Canada, Croatia, Cyprus, Czechia, Denmark, Estonia, Finland, France, Germany, Greece, Hungary, Ireland, Italy, Latvia, Lithuania, Luxembourg, Netherlands, Norway, Poland, Portugal, Romania, Slovakia, Slovenia, Spain, Sweden, Switzerland, Ukraine, the United Kingdom, the United State, Mexico, Egypt, Saudi Arabia | Belarus, Turkey, Brazil, Iran, India, China, Vietnam, Indonesia | Australia, Iceland, Japan, Kazakhstan, New Zealand, Russia, South Korea |



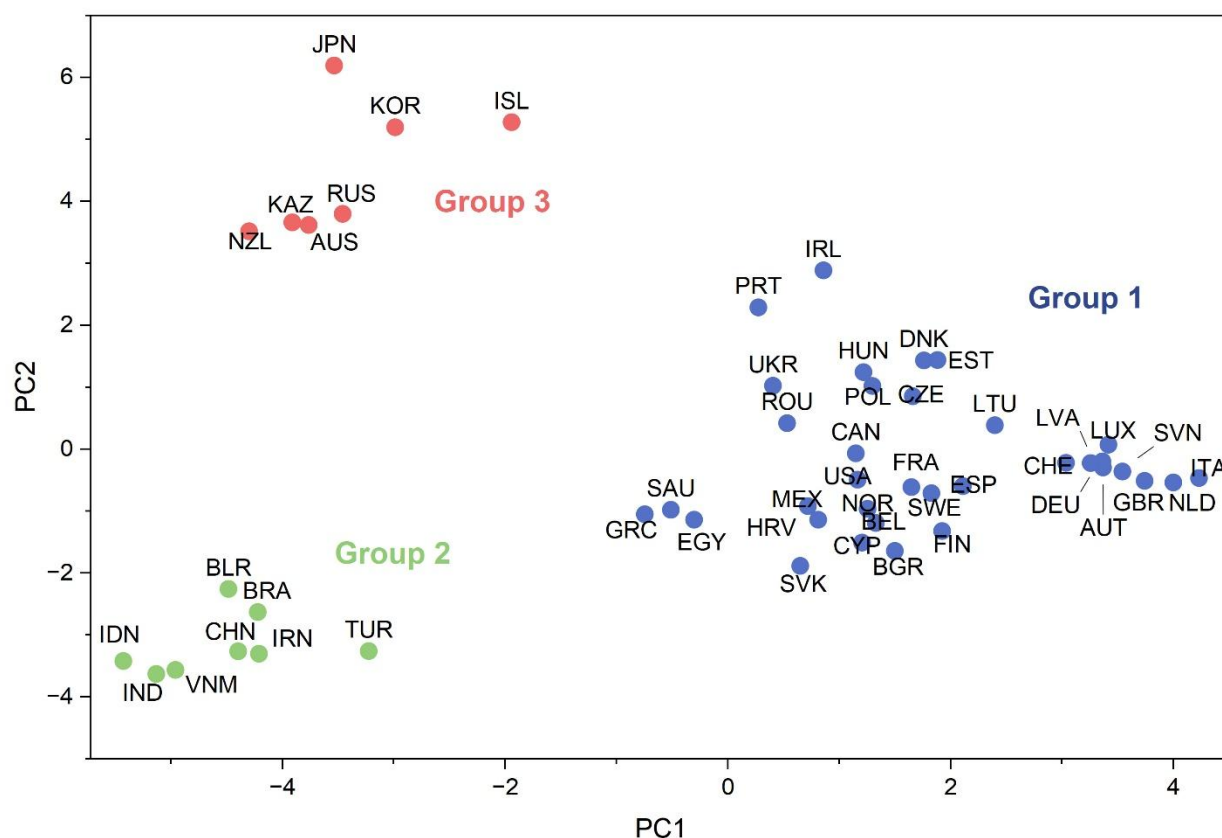

139

140 **Fig. S5:** PCA score plot of countries based on the first two principal components (PC1 and PC2).

141 The ranges of the five key parameters for the three clusters are summarized in Table S3. Countries may  
 142 identify their corresponding cluster by comparing national parameter values with these ranges, thereby  
 143 selecting the appropriate Tier 1B default carbon absorption factors.

144 **Table S3.** The ranges of the five key carbonation parameters for the three groups.

| Carbonation parameters                   |                                        | Group 1                   | Group 2                   | Group 3                   |
|------------------------------------------|----------------------------------------|---------------------------|---------------------------|---------------------------|
| Proportion of cement used for concrete   |                                        | 74.00%<br>(49.74%-95.69%) | 67.85%<br>(55.01%-80.60%) | 71.78%<br>(40.90%-86.11%) |
| Distribution of concrete strength class  | <C15                                   | 6.76%<br>(0.03%-31.25%)   | 8.06%<br>(1.50%-16.50%)   | 5.6%<br>(0.33%-9.40%)     |
|                                          | C16-C23                                | 35.99%<br>(4.20%-77.00%)  | 45.20%<br>(13.70%-83.12%) | 42.69%<br>(23.18%-65.80%) |
|                                          | C24-C35                                | 45.06%<br>(11.33%-78.64%) | 28.22%<br>(2.09%-66.00%)  | 39.1%<br>(15.48%-54.55%)  |
|                                          | >C35                                   | 13.82%<br>(2.00%-47.34%)  | 19.51%<br>(2.92%-47.34%)  | 14.3%<br>(9.32%-23.48%)   |
| Building lifespan                        |                                        | 67 (35-100)               | 50 (40-100)               | 45 (13-90)                |
| Distribution in different disposal types | RCA for new cement concrete            | 67.57%<br>(41.20%-99.80%) | 3.09%<br>(0.00%-9.50%)    | 8.30%<br>(2.00%-19.90%)   |
|                                          | RCA for Road base materials and others | 13.88%<br>(0.00%-48.10%)  | 3.79%<br>(0.00%-12.50%)   | 71.64%<br>(65.00%-88.50%) |
|                                          | Landfill and Stacking                  | 18.55%<br>(0.20%-44.90%)  | 93.19%<br>(83.30%-99.50%) | 20.07%<br>(4.70%-32.00%)  |
| RCA for new cement concrete              | <5mm                                   | 28.99%<br>(14.90%-29.40%) | 20.34%<br>(14.90%-29.40%) | 21.11%<br>(14.90%-29.40%) |
|                                          | 5-10mm                                 | 14.12%<br>(13.80%-25.10%) | 20.86%<br>(13.80%-25.10%) | 20.26%<br>(13.80%-25.10%) |
|                                          | 10-20mm                                | 39.24%<br>(39.20%-40.60%) | 40.08%<br>(39.20%-40.60%) | 40.00%<br>(39.20%-40.60%) |
|                                          | 20-32mm                                | 17.65%<br>(17.60%-19.40%) | 18.73%<br>(17.60%-19.40%) | 18.63%<br>(17.60%-19.40%) |
| RCA for Road base materials and others   | <1mm                                   | 15.59%<br>(11.70%-15.70%) | 13.20%<br>(11.70%-15.70%) | 13.41%<br>(11.70%-15.70%) |
|                                          | 1-10mm                                 | 27.48%<br>(26.90%-27.50%) | 27.13%<br>(26.90%-27.50%) | 27.16%<br>(26.90%-27.50%) |
|                                          | 10-30mm                                | 39.28%<br>(39.20%-42.00%) | 40.95%<br>(39.20%-42.00%) | 40.80%<br>(39.20%-42.00%) |
|                                          | >30mm                                  | 17.65%<br>(17.60%-19.40%) | 18.73%<br>(17.60%-19.40%) | 18.63%<br>(17.60%-19.40%) |
| Landfill and Stacking                    | <10mm                                  | 17.80%<br>(12.20%-25.60%) | 17.80%<br>(12.20%-25.60%) | 17.80%<br>(12.20%-25.60%) |
|                                          | 10-30mm                                | 27.10%<br>(19.50%-35.40%) | 27.10%<br>(19.50%-35.40%) | 27.10%<br>(19.50%-35.40%) |
|                                          | 30-50mm                                | 17.30%<br>(10.60%-22.50%) | 17.30%<br>(10.60%-22.50%) | 17.30%<br>(10.60%-22.50%) |
|                                          | >50mm                                  | 37.80%<br>(24.80%-48.40%) | 37.80%<br>(24.80%-48.40%) | 37.80%<br>(24.80%-48.40%) |

146      **Supplementary Note 4: The parameters for national absorption factors of cement carbonation in the Tier 2 method.**

| Activity Data                                                               | Input Parameters                     |                                                                             |                                                   |                                                               |                                                                        |                                      |                                                               |                                                             |                                                               |                   | Output             |
|-----------------------------------------------------------------------------|--------------------------------------|-----------------------------------------------------------------------------|---------------------------------------------------|---------------------------------------------------------------|------------------------------------------------------------------------|--------------------------------------|---------------------------------------------------------------|-------------------------------------------------------------|---------------------------------------------------------------|-------------------|--------------------|
| Clinker production                                                          | CKD generation rate based on clinker |                                                                             | Proportion of CKD disposal                        |                                                               | CaO content in CKD                                                     |                                      | Proportion of CaO converted to CaCO <sub>3</sub> for CKD      |                                                             |                                                               | Production stage  |                    |
|                                                                             |                                      |                                                                             | recycling                                         |                                                               |                                                                        |                                      |                                                               |                                                             |                                                               | CKD               |                    |
|                                                                             |                                      |                                                                             | landfill                                          |                                                               |                                                                        |                                      |                                                               |                                                             |                                                               |                   |                    |
| Cement consumption                                                          | Proportion of cement loss            |                                                                             | Loss rate of cement for concrete                  |                                                               | CaO content                                                            |                                      | Proportion of CaO converted to CaCO <sub>3</sub> for concrete |                                                             | Construction waste concrete carbonation time                  |                   | Construction stage |
|                                                                             |                                      |                                                                             | Loss rate of cement for mortar                    |                                                               |                                                                        |                                      |                                                               |                                                             |                                                               |                   | Concrete loss      |
|                                                                             |                                      |                                                                             |                                                   |                                                               |                                                                        |                                      |                                                               |                                                             |                                                               |                   | Mortar loss        |
|                                                                             | Proportion of Cement for concrete    | Concrete strength classes                                                   | Cement content for concrete                       | Carbonation rate coefficients                                 | Correction factors of carbonation rate coefficients                    |                                      | Concrete structure thickness                                  | CaO/MgO content                                             | Proportion of CaO converted to CaCO <sub>3</sub> for concrete | Building lifespan | Service lie stage  |
|                                                                             |                                      | ≤C15<br>C16-C23<br>C24-C35<br>>C35                                          | ≤C15<br>C16-C23<br>C24-C35<br>>C35                | ≤C15<br>C16-C23<br>C24-C35<br>>C35                            | Cement additions<br>CO <sub>2</sub> concentration<br>Cover and coating |                                      | Wall<br>Beam<br>Pillar<br>Slabs                               |                                                             |                                                               |                   | Concrete           |
|                                                                             | Proportion of Cement for mortar      | Proportion of mortar utilization types                                      | Mortar thickness                                  | Proportions of masonry wall with render                       |                                                                        | Mortar carbonation rate coefficients | CaO/MgO content                                               | Proportion of CaO converted to CaCO <sub>3</sub> for mortar | Building lifespan                                             | Mortar            |                    |
| Rendering, plastering, & decorating<br>Maintenance and repairing<br>Masonry |                                      | Rendering, plastering, & decorating<br>Maintenance and repairing<br>Masonry | Both sides render<br>One side render<br>No render |                                                               |                                                                        |                                      |                                                               |                                                             |                                                               |                   |                    |
| Carbonation rate coefficients during demolition stage                       |                                      | CaO/MgO content                                                             |                                                   | Proportion of CaO converted to CaCO <sub>3</sub> for concrete |                                                                        | Exposure time in demolition stage    |                                                               | Demolition stage                                            |                                                               |                   |                    |
| ≤C15<br>C16-C23<br>C24-C35<br>>C35                                          |                                      |                                                                             |                                                   |                                                               |                                                                        |                                      |                                                               |                                                             |                                                               |                   |                    |
| Proportion of waste concrete in different disposal types                    |                                      | Particle size distribution in different disposal types                      |                                                   | Carbonation rate coefficients in disposal stage               |                                                                        | CaO/MgO content                      | Proportion of CaO converted to CaCO <sub>3</sub> for concrete | Carbonation time                                            |                                                               | Disposal stage    |                    |
| New cement concrete                                                         |                                      | <5mm                                                                        |                                                   | ≤C15                                                          |                                                                        |                                      |                                                               |                                                             |                                                               |                   |                    |
| Road base materials                                                         |                                      | 5-10mm                                                                      |                                                   | C16-C23                                                       |                                                                        |                                      |                                                               |                                                             |                                                               |                   |                    |
| Landfill and Stacking                                                       |                                      | 11-20mm                                                                     |                                                   | C24-C35                                                       |                                                                        |                                      |                                                               |                                                             |                                                               |                   |                    |
|                                                                             |                                      | 21-32mm                                                                     |                                                   | >C35                                                          |                                                                        |                                      |                                                               |                                                             |                                                               |                   |                    |

147

148      **Fig. S6: Input parameters for national absorption factors of cement carbonation in the Tier 2 method**

## **4.1 Global Parameters**

The CaO and MgO contents in cement materials, as well as the proportion of CaO (MgO) converted to CaCO<sub>3</sub> (MgCO<sub>3</sub>), are required input parameters for calculating cement absorption factors at all life-cycle stages. They are considered as global parameters.

### **4.1.1 CaO/MgO content in cement**

CaO and MgO are the principal components governing the carbonation potential of cement-based materials, and their abundance determines the theoretical maximum extent of carbonation. Although CKD is generated as dust during cement production, its chemical composition differs substantially from that of clinker. Accordingly, we calculate the absorption factors for the production and consumption stages using the CaO/MgO contents of CKD and clinker as input parameters, respectively. Previous study<sup>4</sup> indicates that CKD typically contains about 44.10% CaO (range: 19.0%–61.23%) and less than 1% MgO. In contrast, clinker has an average CaO content of 65.0% (60.0%–67.0%)<sup>5</sup> and an average MgO content of approximately 2.5% (0–5.0%)<sup>6,7</sup>. We vary the CaO/MgO contents of both CKD and clinker using a triangular distribution, see Data 1.3 and Data 3.4.4 for details in Supplementary Table2.

### **4.1.2 Proportion of CaO converted to CaCO<sub>3</sub>**

The degree to which CaO is converted to CaCO<sub>3</sub> during carbonation is another global parameter that directly determines the actual uptake of CO<sub>2</sub>. This ratio reflects the fraction of reactive CaO that ultimately participates in carbonation under realistic environmental or operational conditions. Given the variability in reaction kinetics and exposure environments, we treat proportion of CaO converted to CaCO<sub>3</sub> as an uncertain parameter and assign it a Weibull distribution in the Monte Carlo analysis. Based on multiple experimental studies<sup>8–11</sup>, the conversion ratio of CaO to CaCO<sub>3</sub> in concrete ranges from 50% to 90%. The shape and scale parameter of the Weibull distribution were set to 25 and 86.0%, respectively (see Data 3.4.5 for details in Supplementary Table2). The proportion of CaO to CaCO<sub>3</sub> in mortar is range from 50.2% to 100%, which is from experimental tests in our previous study<sup>12</sup>. The shape and scale parameter of the Weibull distribution were set to 20 and 91.45%, respectively (see Data 3.5.2 for details in Supplementary Table2).

## **4.2 Local parameters**

### **4.2.1 Input parameters in cement production stage**

Cement kiln dust (CKD) is an intrinsic process residue generated during cement production<sup>4</sup>. A part of CKD can be recycled to clinker production, while the rest is considered to be “lost” to the process. This lost CKD is not ultimately deployed in cement products, but its exposure to the atmosphere in disposal sites or other applications enables carbonation. Therefore, the associated carbon absorption should be included in the sink inventory. The particles of CKD are extremely fine (<200μm), its substantial carbonization within the first two days of landfill reaction and completing full carbonization within one year. Consequently, the carbon absorption factor for CKD in the inventory is specific to the

185 reporting year. It is dependent on parameters of the annual CKD generation rate and proportion of  
186 CKD to landfill etc.

#### 187 **4.2.1.1 CKD generation rate based on clinker**

188 CKD generation rates vary dramatically among facilities in cement industry. Clinker production as the  
189 activity data for carbon sequestration accounting during the production phase, which is consistent with  
190 the activity data for emissions from production activities. Accordingly, this parameter represents the  
191 ratio of CKD output to clinker production. For national-scale assessments, it is recommended that  
192 countries derive this ratio from annual plant-level statistics. In this study, the CKD generation rate is  
193 set at 6.0% (range: 4.1%–11.5%)<sup>4</sup> and modeled using a triangular distribution, see Data 1.1 in  
194 Supplementary Table2.

#### 195 **4.2.1.2 Proportion of CKD to landfill**

196 Previous studies<sup>4,13</sup> reported that that approximately 80% (range: 52%–90%) of CKD removed from  
197 cement kilns is disposed of in landfills, while the remaining 20% portion is beneficially reused. This  
198 parameter is modeled using a triangular distribution to capture its variability, see Data 1.2 in  
199 Supplementary Table2. As technological advancements improve CKD recycling and reuse pathways,  
200 the landfill share may change over time. It is therefore recommended that facilities track this parameter  
201 annually to reflect evolving CKD management practices.

#### 202 **4.2.2 Input parameters in construction stage**

203 During the construction phase, some concrete and mortar are lost and subsequently backfilled and  
204 buried<sup>14-15</sup> to undergo carbonation reactions. The input parameters for the cement carbon absorption  
205 factor at this stage primarily include proportion of cement loss, the loss rate for concrete and mortar,  
206 and carbonation time, see Data 2 in Supplementary Table2.

#### 207 **4.2.2.1 Proportion of cement loss in construction processing stage**

208 It refers to the proportion of losses during the construction period relative to total cement consumption.  
209 Construction budget standards<sup>16</sup> and previous study<sup>17</sup> indicate that between 1 and 3% of cement is lost  
210 during construction. We therefore vary the parameter assuming a triangular distribution spanning this  
211 range and with a mode value of 1.5%.

#### 212 **4.2.2.2 Loss rate of cement for concrete/mortar**

213 It refers to the ratio of concrete/mortar in cement loss. For concrete, the cement loss rate is modeled  
214 using a triangular distribution with a mode of 41.4% and a range of 20%–60%. For mortar, the loss  
215 rate is likewise modeled as a triangular distribution, with a mode of 58.6% and a range of 40%–80%.

#### 216 **4.2.2.3 Construction waste concrete carbonation time**

Most construction waste is in the form of small particles<sup>14</sup>, the construction loss mortar can be fully carbonized within one year. The construction waste concrete carbonation time is estimated in triangular distribution with mode value is 5 years, maximum value is 10 years, and minimum value is 1 year.

#### **4.2.3 Input parameters in service life stage**

During the service life, the differences in material properties and exposure conditions between concrete and mortar necessitate distinct approaches for calculating their carbonation factors.

##### **4.2.3.1 Input parameters in service life stage for concrete**

The input parameters for concrete carbonation including the proportion of cement for concrete, concrete strength classes distribution, cement content in concrete, and carbonation rate coefficients in different strength classes, correct factor of carbonation rate coefficients by environment, and the concrete structure thickness.

##### **(1) Proportion of cement for concrete**

It represents the proportion of cement consumption for concrete and is modeled using a Weibull distribution. Data for European countries were collected from the European Ready Mixed Concrete Organization (EMRCO)<sup>18</sup>. Data of the United State were derived from United States Geological Survey (USGS) statistics<sup>1</sup>, the scale parameter is 85.98% and the shape parameter is 4, with a range of 68.94%-89.41%. Chinese data were sourced from industry surveys<sup>12</sup>, the scale parameter is 69.34% and the shape parameter is 4, with a range of 67.07%-71.16%. For Brazil and Mexico<sup>19</sup>, the scale parameter is 60.00% and the shape parameter is 4, with a range of 55.00%-65.00%. For Egypt<sup>20</sup>, the scale parameter is 82.22% and the shape parameter is 4, with a range of 63.00%-93.33%. For Indian<sup>21</sup>, the scale parameter is 80.06% and the shape parameter is 4, with a range of 28.85%-88.31%. For Indonesia and Vietnam<sup>22</sup>, the scale parameter is 66.11% and the shape parameter is 4, with a range of 50.86%-90.22%.

The proportion of cement used in concrete is critical for calculating the carbon absorption factor of cement, with sensitivity around 70%<sup>12</sup>. However, this value currently lacks official statistics.

##### **(2) Concrete strength classes distribution**

It refers to the proportion of concrete distributed in different strength classes: less than 15 MPa (<C15), between 16 MPa and 23 MPa (C16–C23), between 24 MPa and 35 MPa (C25–C35), and greater than 35 MPa (>C35), and it is modeled using a Weibull distribution. This parameter varies largely across countries. We collected data for European countries from ERMCO<sup>18</sup> and estimated the values for other countries based on national building-type data from China Economic Information Center Data (CEIC)<sup>21</sup>. See Data 3.2 in Supplementary Table2.

##### **(3) Cement content in concrete**

It refers to the cement content in different concrete strength classes. For each class, the cement content is varied using a uniform distribution. The minimum and maximum values are 165–288 kg/m<sup>3</sup> for strength class <C15, 240–390 kg/m<sup>3</sup> for C16–C23, 280–400 kg/m<sup>3</sup> for C25–C35, and 300–670 kg/m<sup>3</sup> for >C35.

#### (4) Carbonation rate coefficients

It refers to the carbonation coefficients in different concrete strength classes. The methodology in this study is based on the most widely used empirical carbonation model, which is that the carbonation depth is proportional to the square root of the carbonation time<sup>24</sup>. This model considers only one independent variable, while other factors are considered in a carbonation coefficient “k”. The previous literatures<sup>10,25-28</sup> suggested the carbonation rate coefficients by categorizing the concrete based on strength and exposure conditions. Concrete carbonation coefficients in China are derived from more than 1300 concrete samples all over the China<sup>12</sup>. For each concrete strength class, the carbonation rate coefficients are modeled using uniform distribution, see Data 3.4.2 in Supplementary Table2.

**Table S4.** Carbonation rate coefficients (k) for various concrete strengths and exposure conditions in Europe<sup>23</sup>.

| Exposure condition | Compressive strength (mm/(year) <sup>0.5</sup> ) |           |           |        |
|--------------------|--------------------------------------------------|-----------|-----------|--------|
| K                  | ≤15 MPa                                          | 16–20 Mpa | 23–35 Mpa | >35MPa |
| Exposed outdoor    | 5                                                | 2.5       | 1.5       | 1      |
| Sheltered          | 10                                               | 6         | 4         | 2.5    |
| Indoors            | 15                                               | 9         | 6         | 3.5    |
| Wet                | 2                                                | 1         | 0.75      | 0.5    |
| Buried             | 3                                                | 1.5       | 1         | 0.75   |

**Table S5.** Carbonation rate coefficients (k) for various concrete strengths and exposure conditions in China<sup>9</sup>.

| Exposure condition | Compressive strength (mm/(year) <sup>0.5</sup> ) |           |           |        |
|--------------------|--------------------------------------------------|-----------|-----------|--------|
| K                  | ≤15 MPa                                          | 16–20 Mpa | 23–35 Mpa | >35MPa |
| Exposed outdoor    | 6.1                                              | 3.9       | 2.4       | 1.3    |
| Sheltered          | 9.9                                              | 7.1       | 4.8       | 2.5    |
| Indoors            | 13.9                                             | 9.8       | 7.0       | 4      |
| Buried             | 3.8                                              | 1.9       | 1.0       | 0.5    |
| Wet                | 1.9                                              | 1.0       | 0.7       | 0.3    |

#### (5) Correction factor of carbonation rate coefficients

Cement additives can increase the carbonation rate of cement materials<sup>9,29-31</sup>. Elevated CO<sub>2</sub> concentrations in industrial environments<sup>32</sup> and near roadways can further accelerate carbonation rate<sup>33-35</sup>. Conversely, the application of surface treatments reduces carbonation, such as paints or protective coatings<sup>36</sup>. Studies have shown that coating layers can reduce carbonation rates by 0–50%<sup>10,35-39</sup>. In the model, the three correction parameters are represented using Weibull distributions,

respectively. For the correction factor of cement additions, the minimum and maximum bounds are set to 1.0 and 1.3, respectively, with shape and scale parameters of 20 and 1.16. The same bounds and Weibull parameters (minimum 0.93, maximum 1.2, shape 20, scale 1.18) are applied to the correction factor of CO<sub>2</sub> concentration. Similarly, the correction factor of cover and coating protection also uses a Weibull distribution with minimum 0.50, maximum 1.0, and shape and scale parameters of 6 and 1.0. See Data 3.4.3 in Supplementary Table2. The correction factor of cover and coating is applied only to the service life stage and not considered during its demolition stage.

## **(6) Concrete structure thickness**

It refers to the wall thickness of various building structures. Wall and structure thicknesses worldwide range from 60 to 610 mm, with most between 100 and 490 mm<sup>40-43</sup>. It is modeled as a Triangular distribution with mode value 250 mm, and a range of 100-490 mm, see Data 3.4.6 in Supplementary Table2.

## **(7) Building lifespan**

Consistent with prior research<sup>44-46</sup>, building lifespan parameters are represented using a Weibull distribution. The scale and shape parameters see Data 3.3 in Supplementary Table2.

**Table S6.** Building lifespan range in different countries and regions.

| Countries and regions | Building lifespan | References |
|-----------------------|-------------------|------------|
| China                 | 42 (4~73)         | 12         |
| Europe                | 75 (50~90)        | 47,48      |
| USA                   | 74.1 (56.9~82.4)  | 44         |
| Brazil                | 75 (50~100)       | 49         |
| Africa                | 45 (40~50)        | 50         |
| Japan                 | 27 (25~30)        | 51,52      |
| South Korea           | 21 (13~30)        | 53         |
| Indonesia             | 23 (10~35)        | 54         |
| India                 | 50 (35~70)        | 55-60      |

### **4.2.3.2 Input parameters in service life stage for mortar**

The input parameters for mortar carbonation factor including the proportion of cement for mortar, proportion of mortar utilization types, mortar thickness in three utilization types, proportions of masonry wall with render, and mortar carbonation rate coefficient.

#### **(1) Proportion of cement to mortar**

It refers to the proportion of cement consumed in mortar, and it can be calculated as the complement of concrete utilization, i.e., 1 minus the concrete proportion.

#### **(2) Proportion of mortar utilization types**



Mortar is predominantly used in three application categories: (1) rendering, plastering and decorating, (2) masonry, and (3) maintenance and repairing<sup>61</sup>. The majority of mortar is consumed in rendering, plastering, and decorating<sup>62</sup>. The parameter is modeled using a Weibull distribution with a scale of 52.4% and a shape of 14, spanning a range of 24.0%–72.5%. For masonry, the Weibull distribution uses a scale of 18.8% and a shape of 12, with values ranging from 1.7% to 52.2%<sup>12</sup>. The maintenance and repairing mortar's proportion is obtained as one minus the proportions of the aforementioned two.

### (3) Proportions of masonry wall with render

This parameter represents the proportion of masonry mortar used in three wall configurations: (1) both sides rendered, (2) one side rendered, and (3) no rendering. According to our previous survey projects<sup>12</sup>, we vary the shares of masonry walls with different rendering extents using triangular distributions: a mode of 60% (range: 40%–90%) for walls rendered on both sides; a mode of 30% (range: 10%–50%) for walls rendered on one side; and a mode of 10% (range: 0%–20%) for walls without rendering. These parameter ranges are assumed to be applicable globally.

### (4) Mortar thickness

It refers to the thickness of mortar in three mortar utilization types. Mortar is typically applied in relatively thin layers with large exposed surface areas<sup>61</sup>. Mortar thickness exerts a notable influence on carbonation potential. The thickness of mortar used for rendering, plastering, and decorating is modeled using a Weibull distribution with a scale parameter of 22 mm and a shape parameter of 4, within a range of 3–50 mm. For masonry mortar, thickness is also represented by a Weibull distribution with a scale of 11 mm and a shape of 8, ranging from 5–20 mm. For maintenance and repair applications, mortar thickness follows a Weibull distribution with a scale of 26.8 mm and a shape of 7, spanning a range of 10–50 mm<sup>43,62</sup>.

### (5) Mortar carbonation rate coefficient

The mortar carbonation rate coefficient during the demolition stage was determined in our previous experiment study<sup>12</sup> (see Table S4). This parameter is modeled as a Triangular distribution with a mode 19.6 mm/year<sup>0.5</sup> and range from 6.1 to 36.8 mm/year<sup>0.5</sup>.

**Table S7.** Mortar carbonation rate coefficients measured in China<sup>12</sup>

| Cement types    | Strength class | Exposure conditions | Average (mm/year <sup>0.5</sup> ) | Max (mm/year <sup>0.5</sup> ) | Min (mm/year <sup>0.5</sup> ) |
|-----------------|----------------|---------------------|-----------------------------------|-------------------------------|-------------------------------|
| Portland cement | M15            | Outdoor             | 11.1                              | 22.1                          | 4.2                           |
|                 |                | Indoor              | 25.5                              | 36.5                          | 15.4                          |
|                 | M20            | Outdoor             | 10.4                              | 19.2                          | 4.3                           |
|                 |                | Indoor              | 23.9                              | 36.5                          | 13.9                          |
|                 | M25            | Outdoor             | 10.5                              | 17.9                          | 5.2                           |
|                 |                | Indoor              | 23.9                              | 37.8                          | 15.2                          |

|                                  |         |         |      |      |      |
|----------------------------------|---------|---------|------|------|------|
| Fly ash cement or<br>slag cement | M30     | Outdoor | 10.8 | 21.6 | 4.8  |
|                                  |         | Indoor  | 23.5 | 32.5 | 16.3 |
|                                  | M15     | Outdoor | 13.6 | 19.9 | 7.1  |
|                                  |         | Indoor  | 29.1 | 35.4 | 23.3 |
|                                  | M20     | Outdoor | 14.2 | 21.2 | 7.1  |
|                                  |         | Indoor  | 29.9 | 37.1 | 22.3 |
|                                  | M25     | Outdoor | 14.3 | 20.8 | 9.0  |
|                                  |         | Indoor  | 28.8 | 38.8 | 20.8 |
|                                  | M30     | Outdoor | 13.4 | 21.6 | 7.1  |
|                                  |         | Indoor  | 30.2 | 39.4 | 22.6 |
|                                  | Average |         | 19.6 | 36.8 | 6.1  |

#### 4.2.4 Input parameters in demolition stage

In demolition stage, the input parameters include carbonation rate coefficient and exposure time.

##### (1) Carbonation rate coefficient in demolition stage

This refers to the carbonation rate of concrete in the demolition stage, evaluated as the service-phase carbonation rate after removing the correction factor associated with cover and coating protection.

##### (2) Exposure time in demolition stage

This parameter represents the duration of cement exposure during the building demolition phase, measured in years. It is modeled using a Weibull distribution, with a shape parameter of 4 and a scale parameter of 0.4 years, and bounded by a minimum of 0.1 years and a maximum of 1.0 year<sup>63</sup>.

#### 4.2.5 Input parameters in disposal stage

During the disposal phase, demolished concrete is crushed into fine particles and processed through different disposal ways. The parameters considered in this stage include: proportion of waste concrete in different disposal ways, particle size distribution in different disposal ways, carbonation rate coefficients in disposal stage, and carbonation time.

##### (1) Proportion of waste concrete in different disposal ways

It represents the proportion of different disposal ways for waste concrete. We consider three primary end-of-life pathways for demolished concrete: Recycled Concrete Aggregates (RCA) for new cement concrete (direct recycling into concrete), RCA for Road base materials and others (use as road-base / sub-base and other civil-engineering fill applications), and landfill and stacking. The parameters are modeled using a Triangular distribution, see Data 5.1 in Supplementary Table2.

In countries with advanced waste management systems, this parameter is recorded by specialized statistical agencies. For example, Japan's Ministry of Land, Infrastructure, Transport and Tourism (MLIT)<sup>64</sup> and the United States Environmental Protection Agency (EPA)<sup>65</sup> provide survey data on waste concrete. Eurostat<sup>66</sup> compiles detailed annual data on various disposal methods for both

hazardous and non-hazardous construction waste across EU member states. In contrast, in most developing countries, demolished waste remains poorly managed due to limitations in legislation, public awareness, and technological capacity. For instance, demolished waste is not included in China's environmental statistical yearbook, and the reuse rate of demolition materials in India and Vietnam is below 1% with no standardized statistical tracking. Therefore, the input parameter settings for these countries are primarily derived from literature sources. However, demolished waste management and statistics are crucial for obtaining cement carbon absorption factors.

## **(2) Particle size distribution in different disposal ways**

It refers to the particle size of crushed concrete in different disposal ways. This parameter governs the carbonation reaction determined by the exposed surface area, thereby directly influencing both the rate and the ultimate extent of CO<sub>2</sub> uptake. Based on the survey data from our previous research<sup>12</sup>, the particle size distributions for the three disposal methods were categorized into four groups. RCA for new concrete are below 5 mm, 5–10 mm, 11–20 mm, and 21–32 mm. For the second method, RCA for Road base materials and others are below 1 mm, 1–10 mm, 10–30 mm, and above 30 mm. For landfilling and stacking are below 10 mm, 10–30 mm, 30–50 mm, and above 50 mm. This parameter is modeled using a uniform distribution<sup>67,68</sup>, see Data 5.2 in Supplementary Table2.

## **(3) Carbonation rate coefficients in disposal stage**

During the waste disposal phase, the carbonation rate coefficients for concrete materials should be determined according to the specific environmental conditions summarized in Tables S1 and S2. For concrete that is reused (RCA for new cement concrete and Road base materials and others), the coefficient should correspond to the relevant building environment, whereas for landfill disposal, it should reflect the conditions of the buried environment.

## **(4) Carbonation time**

This parameter specifies the full life-cycle duration of cement to be used in the model. To ensure a complete accounting of cement carbonation, the value should be set such that it exceeds the number of years from the earliest recorded national cement use to the reporting year. In this study, we set the carbonation time as 200 years, allowing the model to output annual carbonation absorption factors for each year over the 200-year period.

376 **Supplementary Note 5: Comparison of annual cement carbonation sink derived from different**  
377 **activity data time spans.**

378 Human use of cement spans more than 2,000 years, national-level cement statistics and associated  
379 carbon emission inventories typically start from 1928<sup>3</sup>, providing 95 years of data up to 2024. In  
380 existing datasets, cement records for the United States and Sweden can be traced back to 1880 and  
381 1908, respectively. As shown in the figure S4 and S5, differences in the starting year of activity data  
382 lead to variations in cumulative carbonation by the reporting year. For example, when calculations for  
383 the United States begin in 1880, the annual carbon sequestration in 1983 is 5.2 Mt CO<sub>2</sub> higher than  
384 when starting from 1928, resulting in a cumulative difference of 189 Mt CO<sub>2</sub>. For Sweden, the largest  
385 difference occurs in 1985, with an annual carbon sequestration discrepancy of approximately  
386 0.07 Mt CO<sub>2</sub> and a cumulative difference of 2.8 Mt CO<sub>2</sub>.

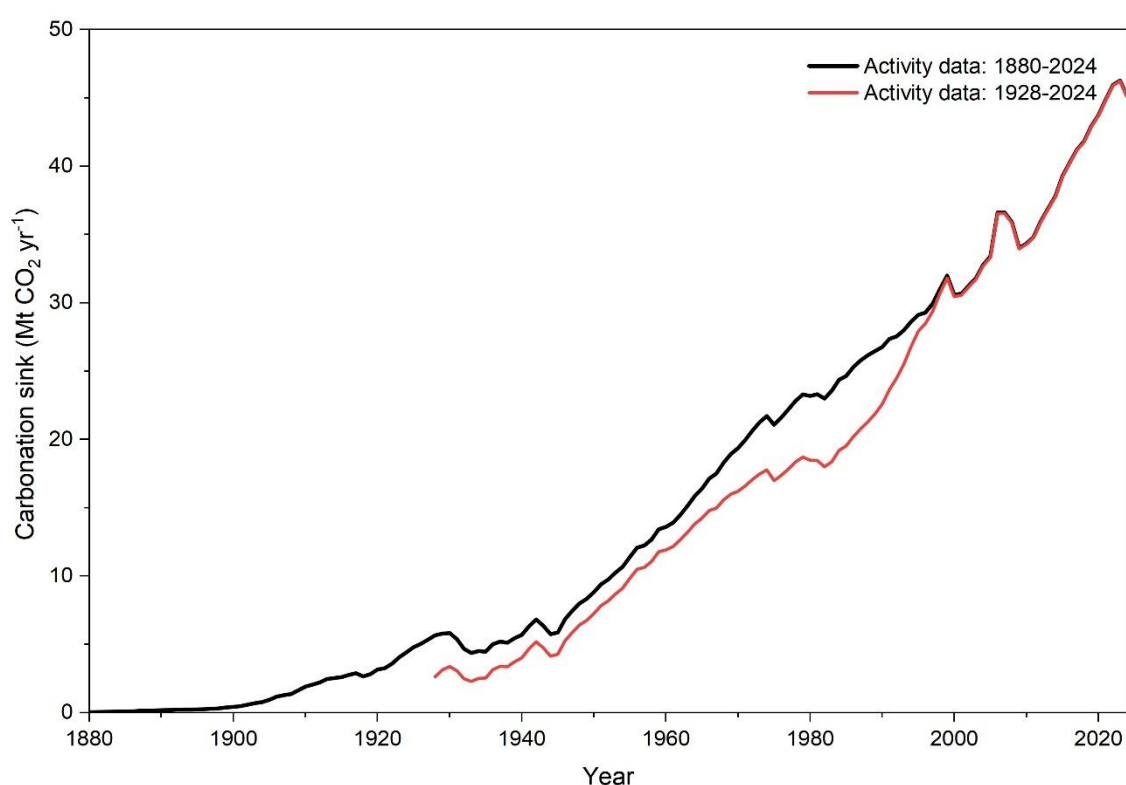

387

388 **Fig. S7: Carbonation sink in the United State under different activity data time spans.**

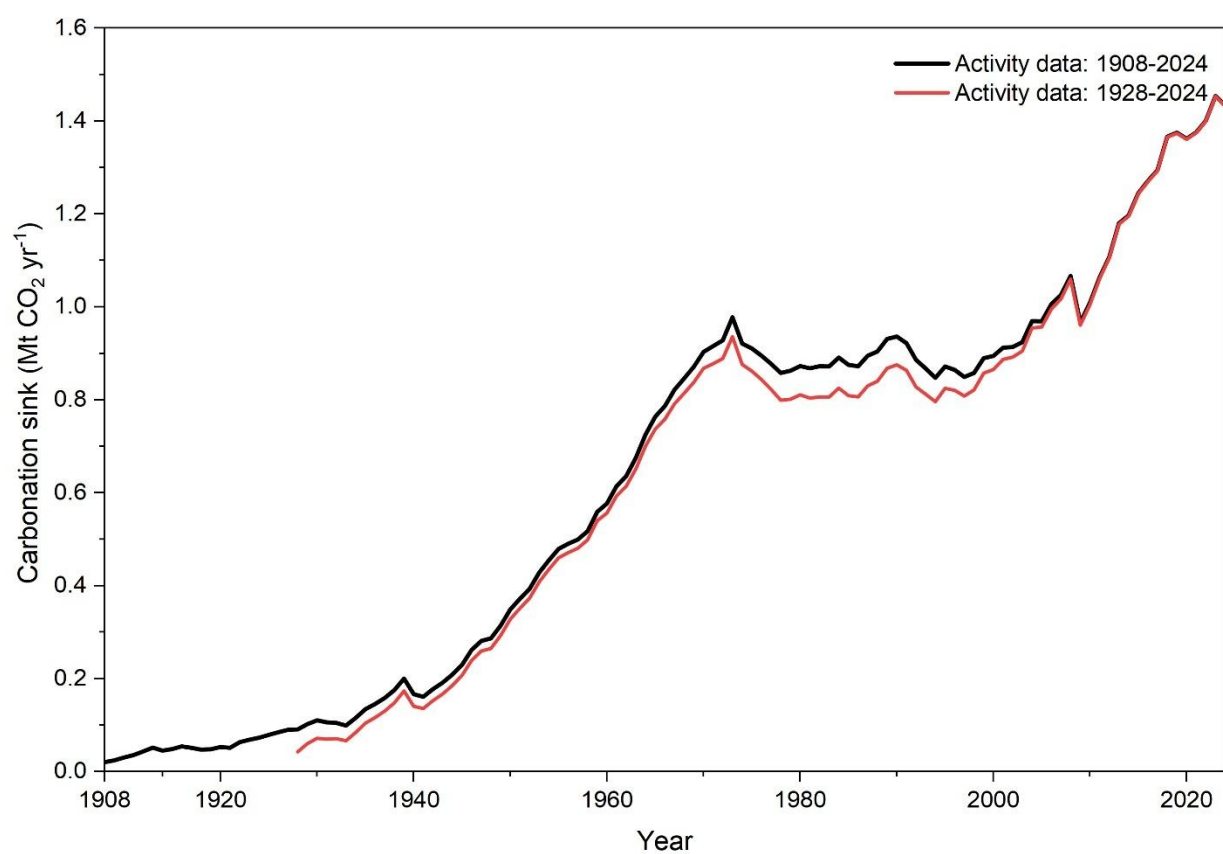

389

390 **Fig. S8: Carbonation sink in the Sweden by different activity data time spans.**

## Reference

1. United States Geological Survey (USGS). Cement Statistics and Information. <http://minerals.usgs.gov/minerals/pubs/commodity/cement/index.html>.
2. Intergovernmental Panel on Climate Change. *2006 IPCC Guidelines for National Greenhouse Gas Inventories*. Institute for Global Environmental Strategies (IGES), Japan (2006).
3. Andrew, R. M. Global CO<sub>2</sub> emissions from cement production, 1928–2018. *Earth Syst. Sci. Data* **11**, 1675–1710 (2019).
4. USEPA. Report to Congress on Cement Kiln Dust. (Office of Solid Waste and Emergency Response, 1993).
5. Intergovernmental Panel on Climate Change. *2006 IPCC Guidelines for National Greenhouse Gas Inventories*. Institute for Global Environmental Strategies (IGES), Japan (2006).
6. Chen, L. Effect of cement chemical composition on service life of concrete. *Concrete*. **225**, 78-79 (In Chinese) (2008).
7. Kurdowski, W. *Cement and Concrete Chemistry*. (Springer, Netherlands, 2014).
8. Gajda, J. Absorption of atmospheric carbon dioxide by portland cement concrete. (Portland Cement Association, 2001).
9. Pade, C. & Guimaraes, M. The CO<sub>2</sub> uptake of concrete in a 100 year perspective. *Cem. Concr. Res.* **37**, 1348-1356 (2007).
10. Andersson, R., Fridh, K., Strippel, H. & Häglund, M. Calculating CO<sub>2</sub> uptake for existing concrete structures during and after service life. *Environ. Sci. Technol.* **47**, 11625-11633 (2013).
11. Chang, C. F. & Chen, J. W. The experimental investigation of concrete carbonation depth. *Cem. Concr. Res.* **36**, 1760-1767 (2006).
12. Xi, F. et al. Substantial global carbon uptake by cement carbonation. *Nat. Geosci.* **9**, 880–883 (2016).
13. Khanna, O. S. *Characterization and Utilization of Cement Kiln Dusts (CKDs) as Partial Replacements of Portland Cement*. (University of Toronto, 2009).
14. Huang, T., Shi, F., Tanikawa, H., Fei, J. & Han, J. Materials demand and environmental impact of buildings construction and demolition in China based on dynamic material flow analysis. *Resour. Conserv. Recy.* **72**, 91-101 (2013).
15. Bossink, B. & Brouwers, H. Construction waste: quantification and source evaluation. *J. Constr. Eng. M.* **122**, 55-60 (1996).
16. Zhou, H. *Construction and Installation Engineering Budget Manual*. (China Machine Press, 2003).
17. Lu, W. et al. An empirical investigation of construction and demolition waste generation rates in Shenzhen city, South China. *Waste Manage.* **31**, 680-687 (2011).
18. EMRCO (European Ready Mixed Concrete Organization). Ready-Mixed Concrete Industry Statistics 2008-2019. <http://www.ermco.eu>.
19. Villagrán-Zaccardi, Y. et al. Overview of cement and concrete production in Latin America and the Caribbean with a focus on the goals of reaching carbon neutrality. *RILEM Tech. Lett.* **7**, 30–46

- (2022).
20. Muigai, R. et al. Cradle-to-gate environmental impacts of the concrete industry in South Africa. *J. South Afr. Inst. Civil Eng.* **55**, 02–07 (2013).
21. Kumar, P. & Kaushik, S. Some trends in the use of concrete: Indian scenario. *Cement Concr. Res.* **33**, 77. (2003).
22. Limsuwan, E. Thailand – Concrete Construction Industry – Cement Based Material and Civil Infrastructure (CBM-CI). Proc. CBM-CI International Workshop, Karachi, Pakistan (2007).
23. CEIC Data: Building Work Completed, CEIC Data [data set], <https://www.ceicdata.com/zh-hans> (last access: 25 August 2024), 2023.
24. You, X., Hu, X., He, P., Liu, J., and Shi, C.: A review on the modelling of carbonation of hardened and fresh cement-based materials, *Cement and Concrete Composites*, **125**, 104315 (2022).
25. European Committee for Standardization (CEN). EN 16757: Sustainability of construction works - Environmental product declarations - Product Category Rules for concrete and concrete elements. CEN, Brussels (2017).
26. Monteiro, I., Branco, F., Brito, J. D. & Neves, R. Statistical analysis of the carbonation coefficient in open air concrete structures. *Constr. Build. Mater.* **29**, 263-269 (2012).
27. Huang, N., Chang, J. & Liang, M. Effect of plastering on the carbonation of a 35-year-old reinforced concrete building. *Constr. Build. Mater.* **29**, 206-214 (2012).
28. Silva, A., Neves, R. & de Brito, J. Statistical modelling of carbonation in reinforced concrete. *Cement Concrete Comp.* **50**, 73-81 (2014).
29. Papadakis, V. G. Effect of supplementary cementing materials on concrete resistance against carbonation and chloride ingress. *Cem. Concr. Res.* **30**, 291-299 (2000).
30. Andrade, C. Evaluation of the degree of carbonation of concretes in three environments. *Constr. Build. Mater.* **230**, 116804 (2020).
31. Atiş, C. D. Accelerated carbonation and testing of concrete made with fly ash. *Constr. Build. Mater.* **17**, 147-152 (2003).
32. Talukdar, S., Banthia, N., Grace, J. & Cohen, S. Carbonation in concrete infrastructure in the context of global climate change: Part 2–Canadian urban simulations. *Cement and Concrete Comp.* **34**, 931-935 (2012).
33. Papadakis, V. G., Vayenas, C. G. & Fardis, M. N. Experimental investigation and mathematical modeling of the concrete carbonation problem. *Chem. Eng. Sci.* **46**, 1333-1338 (1991).
34. Yoon, I. S., Çopuroğlu, O. & Park, K. B. Effect of global climatic change on carbonation progress of concrete. *Atmos. Environ.* **41**, 7274-7285 (2007).
35. Li, D. et al. Evaluating the effect of external and internal factors on carbonation of existing concrete building structures. *Constr. Build. Mater.* **167**, 73–81 (2018).
36. Roy, S., Northwood, D. & Poh, K. Effect of plastering on the carbonation of a 19-year-old reinforced concrete building. *Constr. Build. Mater.* **10**, 267-272 (1996).

37. Park, D. C. Carbonation of concrete in relation to CO<sub>2</sub> permeability and degradation of coatings. *Constr. Build. Mater.* **22**, 2260-2268 (2008).
38. Lo, T. Y., Liao, W., K. Wong, C. & Tang, W. Evaluation of carbonation resistance of paint coated concrete for buildings. *Constr. Build. Mater.* **107**, 299–306 (2016).
39. Li, G., Dong, L., Bai, Z., Lei, M. & Du, J. Predicting carbonation depth for concrete with organic film coatings combined with ageing effects. *Constr. Build. Mater.* **142**, 59–65 (2017).
40. Zhou, H. Construction and Installation Engineering Budget Manual. (China Machine Press, 2003).
41. Hendry, E. A. W. Masonry walls: materials and construction. *Constr. Build. Mater.* **15**, 323-330 (2001).
42. Mineral Products Association – UK Concrete. UK Greenhouse Gas Inventory Improvement: Carbonation of Concrete Emissions Sink Modelling. MPA, London (2023).
43. Standardization Administration of China. GB/T 50010-2010 (2024 edition). Code for design of concrete structures. China Architecture & Building Press (2024).
44. Kapur, A., Keoleian, G., Kendall, A. & Kesler, S. E. Dynamic Modeling of In-Use Cement Stocks in the United States. *J. Ind. Ecol.* **12**, 539-556 (2008).
45. Miatto, A., Schandl, H. & Tanikawa, H. How important are realistic building lifespan assumptions for material stock and demolition waste accounts? *Resour. Conserv. Recycl.* **122**, 143–154 (2017).
46. Cai, W., Wan, L., Jiang, Y., Wang, C. & Lin, L. Short-lived buildings in China: Impacts on water, energy, and carbon emissions. *Environ. Sci. Technol.* **49**, 13921–13928 (2015).
47. Pommer, K., Pade, C., Institut, D. T. & Centre, N. I. Guidelines: Uptake of Carbon Dioxide in the Life Cycle Inventory of Concrete. (Nordic Innovation Centre, 2006).
48. Mequignon, M., Ait Haddou, H., Thellier, F. & Bonhomme, M. Greenhouse gases and building lifetimes. *Build. Environ.* **68**, 77-86 (2013).
49. da Silva, M. R., Rohden, A. B., Mesquita, E. F. T. & Garcez, M. R. Influence of concrete cover in the service life of a newly built reinforced concrete structure: A case study. *J. Build. Pathol. Rehabil.* **5**, 9 (2020).
50. Lokko, M. et al. Comparing the whole life cycle carbon impact of conventional and biogenic building materials across major residential typologies in Ghana and Senegal. *Sustain. Cities Soc.* **106**, 105332 (2024).
51. Wuyts, W., Miatto, A., Sedlitzky, R. & Tanikawa, H. Extending or ending the life of residential buildings in Japan: A social circular economy approach to the problem of short-lived constructions. *J. Clean. Prod.* **231**, 660–670 (2019).
52. Minami, K. The efforts to develop longer life housing with adaptability in Japan. *Energy Procedia* **96**, 662–673 (2016).
53. Ji, S., Lee, B. & Yi, M. Y. Building life-span prediction for life cycle assessment and life cycle cost using machine learning: A big data approach. *Build. Environ.* **205**, 108267 (2021).
54. Surahman, U., Kubota, T. & Higashi, O. Life cycle assessment of energy and CO<sub>2</sub> emissions for residential buildings in jakarta and bandung, indonesia. *Buildings* **5**, 1131–1155 (2015).



55. Bhyan, P., Shrivastava, B. & Kumar, N. Systematic literature review of life cycle sustainability assessment system for residential buildings: Using bibliometric analysis 2000–2020. *Environ. Dev. Sustain.* **25**, 13637–13665 (2023).
56. Varun, Sharma, A., Shree, V. & Nautiyal, H. Life cycle environmental assessment of an educational building in northern India: A case study. *Sustain. Cities Soc.* **4**, 22–28 (2012).
57. Praseeda, K. I., Reddy, B. V. V. & Mani, M. Embodied and operational energy of urban residential buildings in India. *Energy Build.* **110**, 211–219 (2016).
58. Abd Rashid, A. F., Idris, J. & Yusoff, S. Environmental impact analysis on residential building in Malaysia using life cycle assessment. *Sustainability.* **9**, 329 (2017).
59. Kofoworola, O. F. & Gheewala, S. H. Environmental life cycle assessment of a commercial office building in Thailand. *Int. J. Life Cycle Assess.* **13**, 498–511 (2008).
60. Ansah, M. K., Chen, X., Yang, H., Lu, L. & Lam, P. T. I. An integrated life cycle assessment of different façade systems for a typical residential building in Ghana. *Sustain. Cities Soc.* **53**, 101974 (2020).
61. Lutz, H. & Bayer, R. Ullmann's Encyclopedia of Industrial Chemistry Vol. 11 (Wiley, New York, 2010).
62. Winter, C. & Plank, J. The European dry-mix mortar industry (Part 1). *ZKG. INT.* **60**, 62 (2007).
63. Dodoo, A., Gustavsson, L. & Sathre, R. Carbon implications of end-of-life management of building materials. *Resour. Conserv. Recy.* **53**, 276–286 (2009).
64. Ministry of Land, Infrastructure, Transport and Tourism (MLIT). “Recent changes in societal conditions around construction by-products and past initiatives” (Materials No. 2, 13 September 2024). Available at: <https://www.mlit.go.jp/policy/shingikai/content/05shiryou2.pdf> (accessed 25 Nov 2025).
65. United States Environmental Protection Agency (EPA). Studies, summary tables and data related to the Advancing Sustainable Materials Management report. Available at: <https://www.epa.gov/facts-and-figures-about-materials-waste-and-recycling/studies-summary-tables-and-data-related> (accessed 25 Nov 2025).
66. European Commission (Eurostat). *Waste statistics*. Eurostat Statistics Explained. Available at: [https://ec.europa.eu/eurostat/statistics-explained/index.php?title=Waste\\_statistics](https://ec.europa.eu/eurostat/statistics-explained/index.php?title=Waste_statistics) (2024, accessed 15 October 2024).
67. Yang, K. H., Seo, E. A. & Tae, S. H. Carbonation and CO<sub>2</sub> uptake of concrete. *Environ. Impact. Asses.* **46**, 43–52 (2014).
68. Kikuchi, T. & Kuroda, Y. Carbon Dioxide Uptake in Demolished and Crushed Concrete. *J. Adv. Concr. Technol.* **9**, 115–124 (2011).
