# Supplementary material for: A framework for integrating cement carbonation sink into national greenhouse gas inventories
Source: Research Square preprint supplement (doi:10.21203/rs.3.rs-8587414/v1), 2026-01-29
Supplement: Supplementary file 2 [file d68c5492b41d71b634f3f0aa.xlsx]

## Sheet: Index
Supplementary Table2: carbonation parameters
Data 1: Input Parameters in Product Stage.	Data 1.1: CKD generation rate based on clinker
	Data 1.2: Proportion of CKD for landfill disposal
	Data 1.3: CaO content in CKD
	Data 1.4: Proportion of CaO converted to CaCO3 for CKD
Data 2: Input Parameters in Construction Stage.	Data 2.1: Proportion of cement loss
	Data 2.2: Loss rate
	Data 2.3: Construction waste concrete carbonation time
Data 3: Input Parameters in Service Life Stage.	Data 3.1: Proportion of cement for concrete	Key parameter 1
	Data 3.2: Distribution of concrete strength classes	Key parameter 2
	Data 3.3: Building lifespan	Key parameter 3
	Data 3.4: Input parameters in service life stage for concrete
	Data 3.5: Input parameters in service life stage for mortar
Data 4: Input Parameters in End-of-life Stage.	Data 4.1: Exposure time in demolition stage
	Data 4.2: Carbonation rate coefficients under buried conditions
Data 5: Input Parameters in Disposal Stage.	Data 5.1: Distribution in different disposal types	Key parameter 4
	Data 5.2: Particle size distribution in different disposal types	Key parameter 5

## Sheet: Data 1
	Data1: Input Parameters in Product Stage.
	Data1.1: CKD generation rate based on clinker
	Parameters	Distribution	Mode	lower	upper
	CKD generation rate based on clinker	Triangular	0.06	0.041	0.115
	Data1.2: Proportion of CKD for landfill disposal
	Parameters	Distribution	Mode	lower	upper
	Proportion of CKD for landfill disposal	Triangular	0.8	0.52	0.9
	Data1.3: CaO content in CKD
	Parameters	Distribution	mean	Standard deviation	lower	upper
	CaO content in CKD	Normal	0.441	8.01	0.194	0.6123
	Data1.4. Proportion of CaO converted to CaCO3 for CKD
	Parameters	Distribution	a	b	max	min
	Proportion of CaO converted to CaCO3 for CKD	Weibull	0.86	25	0.9	0.5

## Sheet: Data 2
	Data2: Input Parameters in Construction Processing Stage.
	Data2.1: Proportion of cement loss
	Parameters	Distribution	Mode	lower	upper
	Proportion of cement loss in construction processing stage	Triangular	0.015	0.01	0.03
	Data2.2: Loss rate
	Parameters	Distribution	Mode	lower	upper
	Loss rate of cement for concrete	Triangular	0.414	0.2	0.6
	Loss rate of cement for mortar	Triangular	0.586	0.4	0.8
	Data2.3: Construction waste concrete carbonation time
	Parameters	Distribution	Mode	lower	upper
	Construction waste concrete carbonation time (year)	Triangular	5	1	10

## Sheet: Data 3.1
	Data3: Input Parameters in Service Life Stage.
	Data3.1: Proportion of cement for concrete
	Parameters	Countries and regions	Distribution	a	b	max	min
	Proportion of cement for concrete	Australia	weibull	0.715939	4	0.877682	0.608922
	Proportion of cement for concrete	Austria	weibull	0.786536	12	0.866667	0.709091
	Proportion of cement for concrete	Belarus	weibull	0.661081	12	0.902165	0.508591
	Proportion of cement for concrete	Belgium	weibull	0.893853	12	0.999844	0.748485
	Proportion of cement for concrete	Bulgaria	weibull	0.715939	12	0.877682	0.608922
	Proportion of cement for concrete	Canada	weibull	0.715939	4	0.877682	0.608922
	Proportion of cement for concrete	Croatia	weibull	0.715939	12	0.877682	0.608922
	Proportion of cement for concrete	Cyprus	weibull	0.715939	12	0.877682	0.608922
	Proportion of cement for concrete	Czechia	weibull	0.827225	12	0.996154	0.68
	Proportion of cement for concrete	Denmark	weibull	0.700452	12	0.883077	0.400833
	Proportion of cement for concrete	Estonia	weibull	0.715939	12	0.877682	0.608922
	Proportion of cement for concrete	Finland	weibull	0.784197	12	0.835263	0.726316
	Proportion of cement for concrete	France	weibull	0.826715	12	0.865161	0.803734
	Proportion of cement for concrete	Germany	weibull	0.820652	12	0.876651	0.750611
	Proportion of cement for concrete	Greece	weibull	0.784615	12	0.9	0.7125
	Proportion of cement for concrete	Hungary	weibull	0.715939	12	0.877682	0.608922
	Proportion of cement for concrete	Iceland	weibull	0.715939	12	0.877682	0.608922
	Proportion of cement for concrete	Ireland	weibull	0.750564	12	0.941538	0.606667
	Proportion of cement for concrete	Italy	weibull	0.665466	12	0.75622	0.550538
	Proportion of cement for concrete	Japan	weibull	0.861136	4	0.98725	0.770728
	Proportion of cement for concrete	Kazakhstan	weibull	0.661081	12	0.902165	0.508591
	Proportion of cement for concrete	Latvia	weibull	0.715939	12	0.877682	0.608922
	Proportion of cement for concrete	Lithuania	weibull	0.715939	12	0.877682	0.608922
	Proportion of cement for concrete	Luxembourg	weibull	0.715939	12	0.877682	0.608922
	Proportion of cement for concrete	Netherlands	weibull	0.801508	12	0.977864	0.307843
	Proportion of cement for concrete	New Zealand	weibull	0.800587	4	0.883123	0.288475
	Proportion of cement for concrete	Norway	weibull	0.956894	12	0.974842	0.933882
	Proportion of cement for concrete	Poland	weibull	0.67969	12	0.889076	0.58805
	Proportion of cement for concrete	Portugal	weibull	0.5698	12	0.729167	0.4125
	Proportion of cement for concrete	Romania	weibull	0.715939	12	0.877682	0.608922
	Proportion of cement for concrete	Russia	weibull	0.409009	12	0.505556	0.342295
	Proportion of cement for concrete	Slovakia	weibull	0.49736	12	0.611471	0.352333
	Proportion of cement for concrete	Slovenia	weibull	0.715939	12	0.877682	0.608922
	Proportion of cement for concrete	Spain	weibull	0.736696	12	0.85	0.455597
	Proportion of cement for concrete	Sweden	weibull	0.807692	12	0.859091	0.756
	Proportion of cement for concrete	Switzerland	weibull	0.664314	12	0.6776	0.639245
	Proportion of cement for concrete	Turkey	weibull	0.550097	12	0.56003	0.527913
	Proportion of cement for concrete	Ukraine	weibull	0.661081	12	0.902165	0.508591
	Proportion of cement for concrete	United Kingdom	weibull	0.797637	12	0.905882	0.712121
	Proportion of cement for concrete	USA	weibull	0.859835	4	0.894056	0.689369
	Proportion of cement for concrete	Mexico	weibull	0.6	4	0.65	0.55
	Proportion of cement for concrete	Brazil	weibull	0.6	12	0.65	0.55
	Proportion of cement for concrete	Egypt	weibull	0.822222	12	0.933333	0.63
	Proportion of cement for concrete	Iran	weibull	0.800587	4	0.883123	0.288475
	Proportion of cement for concrete	Saudi Arabia	weibull	0.800587	4	0.883123	0.288475
	Proportion of cement for concrete	India	weibull	0.800587	4	0.883123	0.288475
	Proportion of cement for concrete	China	weibull	0.693401	4	0.711589	0.670653
	Proportion of cement for concrete	South Korea	weibull	0.861136	4	0.98725	0.770728
	Proportion of cement for concrete	Vietnam	weibull	0.661081	4	0.902165	0.508591
	Proportion of cement for concrete	Indonesia	weibull	0.661081	4	0.902165	0.508591

## Sheet: Data 3.2
	Data3: Input Parameters in Service Life Stage.
	Data3.2: Distribution of concrete strength classes
	Parameters	strength	Countries and regions	Distribution	a	b	max	min		Parameters	strength	Countries and regions	Distribution	a	b	max	min		Parameters	strength	Countries and regions	Distribution	a	b	max	min		Parameters	strength	Countries and regions	Distribution	a	b	max	min
	Distribution of concrete strength class	<C15	Australia	weibull	0.055	12	0.08	0.029		Distribution of concrete strength class	C16-C23	Australia	weibull	0.407	12	0.54	0.189		Distribution of concrete strength class	C24-C35	Australia	weibull	0.468	16	0.629	0.32		Distribution of concrete strength class	>C35	Australia	weibull	0.109	12	0.135	0.08		1.384	0.618
	Distribution of concrete strength class	<C15	Austria	weibull	0.0695833	12	0.096	0.05		Distribution of concrete strength class	C16-C23	Austria	weibull	0.246083	12	0.5	0.137		Distribution of concrete strength class	C24-C35	Austria	weibull	0.6525	16	0.729	0.4		Distribution of concrete strength class	>C35	Austria	weibull	0.0590833	12	0.08	0.045		1.405	0.632
	Distribution of concrete strength class	<C15	Belarus	weibull	0.072787	16	0.084976	0.0603642		Distribution of concrete strength class	C16-C23	Belarus	weibull	0.509509	12	0.594832	0.422549		Distribution of concrete strength class	C24-C35	Belarus	weibull	0.182944	12	0.239141	0.11385		Distribution of concrete strength class	>C35	Belarus	weibull	0.234761	12	0.351111	0.14376		1.27006	0.740523
	Distribution of concrete strength class	<C15	Belgium	weibull	0.00583333	12	0.02	0		Distribution of concrete strength class	C16-C23	Belgium	weibull	0.0890833	12	0.1	0.04		Distribution of concrete strength class	C24-C35	Belgium	weibull	0.58675	16	0.77	0.54		Distribution of concrete strength class	>C35	Belgium	weibull	0.309167	12	0.36	0.18		1.25	0.76
	Distribution of concrete strength class	<C15	Bulgaria	weibull	0.055	12	0.08	0.029		Distribution of concrete strength class	C16-C23	Bulgaria	weibull	0.407	12	0.54	0.189		Distribution of concrete strength class	C24-C35	Bulgaria	weibull	0.468	16	0.629	0.32		Distribution of concrete strength class	>C35	Bulgaria	weibull	0.109	12	0.135	0.08		1.384	0.618
	Distribution of concrete strength class	<C15	Canada	weibull	0.055	12	0.08	0.029		Distribution of concrete strength class	C16-C23	Canada	weibull	0.407	12	0.54	0.189		Distribution of concrete strength class	C24-C35	Canada	weibull	0.468	16	0.629	0.32		Distribution of concrete strength class	>C35	Canada	weibull	0.109	12	0.135	0.08		1.384	0.618
	Distribution of concrete strength class	<C15	Croatia	weibull	0.055	12	0.08	0.029		Distribution of concrete strength class	C16-C23	Croatia	weibull	0.407	12	0.54	0.189		Distribution of concrete strength class	C24-C35	Croatia	weibull	0.468	16	0.629	0.32		Distribution of concrete strength class	>C35	Croatia	weibull	0.109	12	0.135	0.08		1.384	0.618
	Distribution of concrete strength class	<C15	Cyprus	weibull	0.055	12	0.08	0.029		Distribution of concrete strength class	C16-C23	Cyprus	weibull	0.407	12	0.54	0.189		Distribution of concrete strength class	C24-C35	Cyprus	weibull	0.468	16	0.629	0.32		Distribution of concrete strength class	>C35	Cyprus	weibull	0.109	12	0.135	0.08		1.384	0.618
	Distribution of concrete strength class	<C15	Czechia	weibull	0.17	12	0.21	0.15		Distribution of concrete strength class	C16-C23	Czechia	weibull	0.301818	16	0.36	0.26		Distribution of concrete strength class	C24-C35	Czechia	weibull	0.333636	16	0.37	0.29		Distribution of concrete strength class	>C35	Czechia	weibull	0.194545	16	0.23	0.15		1.17	0.85
	Distribution of concrete strength class	<C15	Denmark	weibull	0.0609091	12	0.1	0.04		Distribution of concrete strength class	C16-C23	Denmark	weibull	0.398182	12	0.55	0.3		Distribution of concrete strength class	C24-C35	Denmark	weibull	0.36	16	0.4	0.3		Distribution of concrete strength class	>C35	Denmark	weibull	0.180909	12	0.28	0.05		1.33	0.69
	Distribution of concrete strength class	<C15	Estonia	weibull	0.055	12	0.08	0.029		Distribution of concrete strength class	C16-C23	Estonia	weibull	0.407	12	0.54	0.189		Distribution of concrete strength class	C24-C35	Estonia	weibull	0.468	16	0.629	0.32		Distribution of concrete strength class	>C35	Estonia	weibull	0.109	12	0.135	0.08		1.384	0.618
	Distribution of concrete strength class	<C15	Finland	weibull	0.0216667	12	0.1	0		Distribution of concrete strength class	C16-C23	Finland	weibull	0.15	12	0.25	0.06		Distribution of concrete strength class	C24-C35	Finland	weibull	0.661667	12	0.82	0.55		Distribution of concrete strength class	>C35	Finland	weibull	0.165833	12	0.35	0.1		1.52	0.71
	Distribution of concrete strength class	<C15	France	weibull	0.0133333	12	0.02	0.005		Distribution of concrete strength class	C16-C23	France	weibull	0.320833	12	0.68	0.06		Distribution of concrete strength class	C24-C35	France	weibull	0.5825	12	0.82	0.27		Distribution of concrete strength class	>C35	France	weibull	0.0833333	12	0.12	0.03		1.64	0.365
	Distribution of concrete strength class	<C15	Germany	weibull	0.0833333	12	0.11	0.065		Distribution of concrete strength class	C16-C23	Germany	weibull	0.201333	12	0.29	0.158		Distribution of concrete strength class	C24-C35	Germany	weibull	0.575	16	0.613	0.49		Distribution of concrete strength class	>C35	Germany	weibull	0.140333	12	0.184	0.11		1.197	0.823
	Distribution of concrete strength class	<C15	Greece	weibull	0.0366667	16	0.05	0.02		Distribution of concrete strength class	C16-C23	Greece	weibull	0.77	16	0.88	0.7		Distribution of concrete strength class	C24-C35	Greece	weibull	0.173333	12	0.22	0.1		Distribution of concrete strength class	>C35	Greece	weibull	0.02	12	0.03	0		1.18	0.82
	Distribution of concrete strength class	<C15	Hungary	weibull	0.055	12	0.08	0.029		Distribution of concrete strength class	C16-C23	Hungary	weibull	0.407	12	0.54	0.189		Distribution of concrete strength class	C24-C35	Hungary	weibull	0.468	16	0.629	0.32		Distribution of concrete strength class	>C35	Hungary	weibull	0.109	12	0.135	0.08		1.384	0.618
	Distribution of concrete strength class	<C15	Iceland	weibull	0.055	12	0.08	0.029		Distribution of concrete strength class	C16-C23	Iceland	weibull	0.407	12	0.54	0.189		Distribution of concrete strength class	C24-C35	Iceland	weibull	0.468	16	0.629	0.32		Distribution of concrete strength class	>C35	Iceland	weibull	0.109	12	0.135	0.08		1.384	0.618
	Distribution of concrete strength class	<C15	Ireland	weibull	0.055	12	0.08	0.029		Distribution of concrete strength class	C16-C23	Ireland	weibull	0.407	12	0.54	0.189		Distribution of concrete strength class	C24-C35	Ireland	weibull	0.468	16	0.629	0.32		Distribution of concrete strength class	>C35	Ireland	weibull	0.109	12	0.135	0.08		1.384	0.618
	Distribution of concrete strength class	<C15	Italy	weibull	0.0608333	12	0.08	0		Distribution of concrete strength class	C16-C23	Italy	weibull	0.2175	12	0.42	0.15		Distribution of concrete strength class	C24-C35	Italy	weibull	0.679167	16	0.75	0.54		Distribution of concrete strength class	>C35	Italy	weibull	0.0425	12	0.08	0.03		1.33	0.72
	Distribution of concrete strength class	<C15	Japan	weibull	0.00333333	12	0.01	0		Distribution of concrete strength class	C16-C23	Japan	weibull	0.367778	12	0.43	0.34		Distribution of concrete strength class	C24-C35	Japan	weibull	0.447778	16	0.5	0.32		Distribution of concrete strength class	>C35	Japan	weibull	0.181111	12	0.26	0.13		1.2	0.79
	Distribution of concrete strength class	<C15	Kazakhstan	weibull	0.072787	16	0.084976	0.0603642		Distribution of concrete strength class	C16-C23	Kazakhstan	weibull	0.509509	12	0.594832	0.422549		Distribution of concrete strength class	C24-C35	Kazakhstan	weibull	0.182944	12	0.239141	0.11385		Distribution of concrete strength class	>C35	Kazakhstan	weibull	0.234761	12	0.351111	0.14376		1.27006	0.740523
	Distribution of concrete strength class	<C15	Latvia	weibull	0.055	12	0.08	0.029		Distribution of concrete strength class	C16-C23	Latvia	weibull	0.407	12	0.54	0.189		Distribution of concrete strength class	C24-C35	Latvia	weibull	0.468	16	0.629	0.32		Distribution of concrete strength class	>C35	Latvia	weibull	0.109	12	0.135	0.08		1.384	0.618
	Distribution of concrete strength class	<C15	Lithuania	weibull	0.055	12	0.08	0.029		Distribution of concrete strength class	C16-C23	Lithuania	weibull	0.407	12	0.54	0.189		Distribution of concrete strength class	C24-C35	Lithuania	weibull	0.468	16	0.629	0.32		Distribution of concrete strength class	>C35	Lithuania	weibull	0.109	12	0.135	0.08		1.384	0.618
	Distribution of concrete strength class	<C15	Luxembourg	weibull	0.055	12	0.08	0.029		Distribution of concrete strength class	C16-C23	Luxembourg	weibull	0.407	12	0.54	0.189		Distribution of concrete strength class	C24-C35	Luxembourg	weibull	0.468	16	0.629	0.32		Distribution of concrete strength class	>C35	Luxembourg	weibull	0.109	12	0.135	0.08		1.384	0.618
	Distribution of concrete strength class	<C15	Netherlands	weibull	0.0229167	12	0.09	0.01		Distribution of concrete strength class	C16-C23	Netherlands	weibull	0.46125	12	0.66	0.11		Distribution of concrete strength class	C24-C35	Netherlands	weibull	0.3675	12	0.55	0.25		Distribution of concrete strength class	>C35	Netherlands	weibull	0.140417	12	0.55	0.03		1.85	0.4
	Distribution of concrete strength class	<C15	New Zealand	weibull	0.0940069	16	0.100577	0.0854706		Distribution of concrete strength class	C16-C23	New Zealand	weibull	0.658048	16	0.70404	0.598294		Distribution of concrete strength class	C24-C35	New Zealand	weibull	0.154774	12	0.202833	0.112865		Distribution of concrete strength class	>C35	New Zealand	weibull	0.0931711	12	0.156974	0.060551		1.16442	0.857181
	Distribution of concrete strength class	<C15	Norway	weibull	0.000333333	12	0.002	0		Distribution of concrete strength class	C16-C23	Norway	weibull	0.042	12	0.077	0.01		Distribution of concrete strength class	C24-C35	Norway	weibull	0.588917	16	0.82	0.425		Distribution of concrete strength class	>C35	Norway	weibull	0.368833	12	0.543	0.11		1.442	0.545
	Distribution of concrete strength class	<C15	Poland	weibull	0.128083	12	0.16	0.1		Distribution of concrete strength class	C16-C23	Poland	weibull	0.242833	12	0.34	0.154		Distribution of concrete strength class	C24-C35	Poland	weibull	0.484667	16	0.6	0.32		Distribution of concrete strength class	>C35	Poland	weibull	0.147	12	0.272	0.07		1.372	0.644
	Distribution of concrete strength class	<C15	Portugal	weibull	0.0533333	12	0.12	0		Distribution of concrete strength class	C16-C23	Portugal	weibull	0.358083	12	0.57	0.2		Distribution of concrete strength class	C24-C35	Portugal	weibull	0.488083	12	0.716	0.1		Distribution of concrete strength class	>C35	Portugal	weibull	0.0740833	12	0.2	0.035		1.606	0.335
	Distribution of concrete strength class	<C15	Romania	weibull	0.055	12	0.08	0.029		Distribution of concrete strength class	C16-C23	Romania	weibull	0.407	12	0.54	0.189		Distribution of concrete strength class	C24-C35	Romania	weibull	0.468	16	0.629	0.32		Distribution of concrete strength class	>C35	Romania	weibull	0.109	12	0.135	0.08		1.384	0.618
	Distribution of concrete strength class	<C15	Russia	weibull	0.0545455	12	0.1	0.05		Distribution of concrete strength class	C16-C23	Russia	weibull	0.231818	12	0.4	0.05		Distribution of concrete strength class	C24-C35	Russia	weibull	0.545455	12	0.7	0.4		Distribution of concrete strength class	>C35	Russia	weibull	0.168182	16	0.2	0.15		1.4	0.65
	Distribution of concrete strength class	<C15	Slovakia	weibull	0.16	12	0.24	0.07		Distribution of concrete strength class	C16-C23	Slovakia	weibull	0.229167	16	0.28	0.17		Distribution of concrete strength class	C24-C35	Slovakia	weibull	0.48	16	0.71	0.34		Distribution of concrete strength class	>C35	Slovakia	weibull	0.130833	12	0.22	0.05		1.45	0.63
	Distribution of concrete strength class	<C15	Slovenia	weibull	0.055	12	0.08	0.029		Distribution of concrete strength class	C16-C23	Slovenia	weibull	0.407	12	0.54	0.189		Distribution of concrete strength class	C24-C35	Slovenia	weibull	0.468	16	0.629	0.32		Distribution of concrete strength class	>C35	Slovenia	weibull	0.109	12	0.135	0.08		1.384	0.618
	Distribution of concrete strength class	<C15	Spain	weibull	0.0527273	12	0.08	0		Distribution of concrete strength class	C16-C23	Spain	weibull	0.100909	12	0.71	0		Distribution of concrete strength class	C24-C35	Spain	weibull	0.786364	12	0.95	0.21		Distribution of concrete strength class	>C35	Spain	weibull	0.06	12	0.1	0.02		1.84	0.23
	Distribution of concrete strength class	<C15	Sweden	weibull	0.055	12	0.08	0.029		Distribution of concrete strength class	C16-C23	Sweden	weibull	0.407	12	0.54	0.189		Distribution of concrete strength class	C24-C35	Sweden	weibull	0.468	16	0.629	0.32		Distribution of concrete strength class	>C35	Sweden	weibull	0.109	12	0.135	0.08		1.384	0.618
	Distribution of concrete strength class	<C15	Switzerland	weibull	0.055	12	0.08	0.029		Distribution of concrete strength class	C16-C23	Switzerland	weibull	0.407	12	0.54	0.189		Distribution of concrete strength class	C24-C35	Switzerland	weibull	0.468	16	0.629	0.32		Distribution of concrete strength class	>C35	Switzerland	weibull	0.109	12	0.135	0.08		1.384	0.618
	Distribution of concrete strength class	<C15	Turkey	weibull	0.015	12	0.04	0		Distribution of concrete strength class	C16-C23	Turkey	weibull	0.228333	12	0.63	0.045		Distribution of concrete strength class	C24-C35	Turkey	weibull	0.612083	16	0.78	0.25		Distribution of concrete strength class	>C35	Turkey	weibull	0.144583	12	0.255	0.04		1.705	0.335
	Distribution of concrete strength class	<C15	Ukraine	weibull	0.072787	16	0.084976	0.0603642		Distribution of concrete strength class	C16-C23	Ukraine	weibull	0.509509	12	0.594832	0.422549		Distribution of concrete strength class	C24-C35	Ukraine	weibull	0.182944	12	0.239141	0.11385		Distribution of concrete strength class	>C35	Ukraine	weibull	0.234761	12	0.351111	0.14376		1.27006	0.740523
	Distribution of concrete strength class	<C15	United Kingdom	weibull	0.055	12	0.08	0.029		Distribution of concrete strength class	C16-C23	United Kingdom	weibull	0.407	12	0.54	0.189		Distribution of concrete strength class	C24-C35	United Kingdom	weibull	0.468	16	0.629	0.32		Distribution of concrete strength class	>C35	United Kingdom	weibull	0.109	12	0.135	0.08		1.384	0.618
	Distribution of concrete strength class	<C15	USA	weibull	0.3125	12	0.4	0.05		Distribution of concrete strength class	C16-C23	USA	weibull	0.3375	12	0.6	0.25		Distribution of concrete strength class	C24-C35	USA	weibull	0.2375	16	0.25	0.2		Distribution of concrete strength class	>C35	USA	weibull	0.1125	12	0.15	0.1		1.4	0.6
	Distribution of concrete strength class	<C15	Mexico	weibull	0.0332533	16	0.037588	0.0289186		Distribution of concrete strength class	C16-C23	Mexico	weibull	0.232773	16	0.263116	0.20243		Distribution of concrete strength class	C24-C35	Mexico	weibull	0.261189	16	0.294075	0.228303		Distribution of concrete strength class	>C35	Mexico	weibull	0.473381	12	0.540348	0.406414		1.13513	0.866066
	Distribution of concrete strength class	<C15	Brazil	weibull	0.0332533	16	0.037588	0.0289186		Distribution of concrete strength class	C16-C23	Brazil	weibull	0.232773	16	0.263116	0.20243		Distribution of concrete strength class	C24-C35	Brazil	weibull	0.261189	16	0.294075	0.228303		Distribution of concrete strength class	>C35	Brazil	weibull	0.473381	12	0.540348	0.406414		1.13513	0.866066
	Distribution of concrete strength class	<C15	Egypt	weibull	0.089279	16	0.10933	0.0518458		Distribution of concrete strength class	C16-C23	Egypt	weibull	0.624953	12	0.765313	0.362921		Distribution of concrete strength class	C24-C35	Egypt	weibull	0.113328	12	0.443659	0.00192785		Distribution of concrete strength class	>C35	Egypt	weibull	0.172439	12	0.302454	0.122301		1.62076	0.538996
	Distribution of concrete strength class	<C15	Iran	weibull	0.0940069	16	0.100577	0.0854706		Distribution of concrete strength class	C16-C23	Iran	weibull	0.658048	16	0.70404	0.598294		Distribution of concrete strength class	C24-C35	Iran	weibull	0.154774	12	0.202833	0.112865		Distribution of concrete strength class	>C35	Iran	weibull	0.0931711	12	0.156974	0.060551		1.16442	0.857181
	Distribution of concrete strength class	<C15	Saudi Arabia	weibull	0.0940069	16	0.100577	0.0854706		Distribution of concrete strength class	C16-C23	Saudi Arabia	weibull	0.658048	16	0.70404	0.598294		Distribution of concrete strength class	C24-C35	Saudi Arabia	weibull	0.154774	12	0.202833	0.112865		Distribution of concrete strength class	>C35	Saudi Arabia	weibull	0.0931711	12	0.156974	0.060551		1.16442	0.857181
	Distribution of concrete strength class	<C15	India	weibull	0.118741	16	0.123971	0.107564		Distribution of concrete strength class	C16-C23	India	weibull	0.831189	16	0.867796	0.752951		Distribution of concrete strength class	C24-C35	India	weibull	0.0208503	12	0.07111	0.00226853		Distribution of concrete strength class	>C35	India	weibull	0.0292195	12	0.068375	0.00588057		1.13125	0.868664
	Distribution of concrete strength class	<C15	China	weibull	0.165	4	0.335	0		Distribution of concrete strength class	C16-C23	China	weibull	0.137	4	0.258	0		Distribution of concrete strength class	C24-C35	China	weibull	0.66	8	0.828	0.416		Distribution of concrete strength class	>C35	China	weibull	0.116	4	0.234	0		1.655	0.416
	Distribution of concrete strength class	<C15	South Korea	weibull	0.055	12	0.08	0.029		Distribution of concrete strength class	C16-C23	South Korea	weibull	0.407	12	0.54	0.189		Distribution of concrete strength class	C24-C35	South Korea	weibull	0.468	16	0.629	0.32		Distribution of concrete strength class	>C35	South Korea	weibull	0.109	12	0.135	0.08		1.384	0.618
	Distribution of concrete strength class	<C15	Vietnam	weibull	0.072787	16	0.084976	0.0603642		Distribution of concrete strength class	C16-C23	Vietnam	weibull	0.509509	12	0.594832	0.422549		Distribution of concrete strength class	C24-C35	Vietnam	weibull	0.182944	12	0.239141	0.11385		Distribution of concrete strength class	>C35	Vietnam	weibull	0.234761	12	0.351111	0.14376		1.27006	0.740523
	Distribution of concrete strength class	<C15	Indonesia	weibull	0.072787	16	0.084976	0.0603642		Distribution of concrete strength class	C16-C23	Indonesia	weibull	0.509509	12	0.594832	0.422549		Distribution of concrete strength class	C24-C35	Indonesia	weibull	0.182944	12	0.239141	0.11385		Distribution of concrete strength class	>C35	Indonesia	weibull	0.234761	12	0.351111	0.14376		1.27006	0.740523

## Sheet: Data 3.3
	Data3: Input Parameters in Service Life Stage.
	Data3.3: Building lifespan
	Parameters	Countries and regions	Distribution	a	b	max	min
	Building lifespan (year)	Australia	weibull	50	8	70	35
	Building lifespan (year)	Austria	weibull	70	8	90	50
	Building lifespan (year)	Belarus	weibull	50	8	70	35
	Building lifespan (year)	Belgium	weibull	70	8	90	50
	Building lifespan (year)	Bulgaria	weibull	70	8	90	50
	Building lifespan (year)	Canada	weibull	50	8	70	35
	Building lifespan (year)	Croatia	weibull	70	8	90	50
	Building lifespan (year)	Cyprus	weibull	70	8	90	50
	Building lifespan (year)	Czechia	weibull	70	8	90	50
	Building lifespan (year)	Denmark	weibull	70	8	90	50
	Building lifespan (year)	Estonia	weibull	70	8	90	50
	Building lifespan (year)	Finland	weibull	70	8	90	50
	Building lifespan (year)	France	weibull	70	8	90	50
	Building lifespan (year)	Germany	weibull	70	8	90	50
	Building lifespan (year)	Greece	weibull	70	8	90	50
	Building lifespan (year)	Hungary	weibull	70	8	90	50
	Building lifespan (year)	Iceland	weibull	70	8	90	50
	Building lifespan (year)	Ireland	weibull	70	8	90	50
	Building lifespan (year)	Italy	weibull	70	8	90	50
	Building lifespan (year)	Japan	weibull	27	8	30	25
	Building lifespan (year)	Kazakhstan	weibull	50	8	70	35
	Building lifespan (year)	Latvia	weibull	70	8	90	50
	Building lifespan (year)	Lithuania	weibull	70	8	90	50
	Building lifespan (year)	Luxembourg	weibull	70	8	90	50
	Building lifespan (year)	Netherlands	weibull	70	8	90	50
	Building lifespan (year)	New Zealand	weibull	45	12	50	40
	Building lifespan (year)	Norway	weibull	70	8	90	50
	Building lifespan (year)	Poland	weibull	70	8	90	50
	Building lifespan (year)	Portugal	weibull	70	8	90	50
	Building lifespan (year)	Romania	weibull	70	8	90	50
	Building lifespan (year)	Russia	weibull	50	8	70	35
	Building lifespan (year)	Slovakia	weibull	70	8	90	50
	Building lifespan (year)	Slovenia	weibull	70	8	90	50
	Building lifespan (year)	Spain	weibull	70	8	90	50
	Building lifespan (year)	Sweden	weibull	70	8	90	50
	Building lifespan (year)	Switzerland	weibull	70	8	90	50
	Building lifespan (year)	Turkey	weibull	70	8	90	50
	Building lifespan (year)	Ukraine	weibull	50	8	70	35
	Building lifespan (year)	United Kingdom	weibull	70	8	90	50
	Building lifespan (year)	USA	weibull	65	8	82	56
	Building lifespan (year)	Mexico	weibull	50	8	70	35
	Building lifespan (year)	Brazil	weibull	75	8	100	50
	Building lifespan (year)	Egypt	weibull	75	8	100	50
	Building lifespan (year)	Iran	weibull	45	8	50	40
	Building lifespan (year)	Saudi Arabia	weibull	45	8	50	40
	Building lifespan (year)	India	weibull	50	8	70	35
	Building lifespan (year)	China	weibull	35	12	73	4
	Building lifespan (year)	South Korea	weibull	21	8	30	13
	Building lifespan (year)	Vietnam	weibull	50	8	70	35
	Building lifespan (year)	Indonesia	weibull	23	8	35	10

## Sheet: Data 3.4
	Data3: Input Parameters in Service Life Stage.
	Data3.4: Input Parameters in Service Life Stage for Concrete.
	Data3.4.1. Cement content for concrete
	Parameters	strength	Distribution	max	min
	Cement content (kg/m3)	≤C15	uniform	288	165
	Cement content (kg/m3)	C16-C23	uniform	390	240
	Cement content (kg/m3)	C24-C35	uniform	400	280
	Cement content (kg/m3)	>C35	uniform	670	300
	Data3.4.2. Carbonation rate coefficients of concrete by strength class
	Parameters	strength	Distribution	max	min
	Carbonation rate coefficients (mm/(year)0.5)	≤C15	uniform	5	15
	Carbonation rate coefficients (mm/(year)0.5)	C16-C23	uniform	2.5	9
	Carbonation rate coefficients (mm/(year)0.5)	C24-C35	uniform	1.5	6
	Carbonation rate coefficients (mm/(year)0.5)	>C35	uniform	1	3.5
	Data3.4.3. The correction factors of carbonation rate coefficients
	Parameters	Distribution	a	b	max	min
	Correction factors of cement additions	weibull	1.16	20	1.3	1
	Correction factors of CO2 concentration	weibull	1.18	25	1.2	0.93
	Correction factors of cover and coating	weibull	1	6	1	0.5
	Data3.4.4. CaO and MgO content in clinker
	Parameters	Distribution	Mode	lower	upper
	CaO content	Triangular	0.65	0.6	0.67
	MgO content	Triangular	0.025	0	0.05
	Data3.4.5. Proportion of CaO converted to CaCO3 for concrete
	Parameters	Distribution	a	b	max	min
	Proportion of CaO converted to CaCO3 in concrete	Weibull	0.86	25	0.9	0.5
	Data3.4.6. Wall thickness
	Parameters	countries and regions	distribution	Mode	lower	upper
	Wall thickness (mm)	China	Triangular	250	100	490
	Wall thickness (mm)	United State	Triangular	225	75	610
	Wall thickness (mm)	Europe	Triangular	255	180	400

## Sheet: Data 3.5
	Data3: Input Parameters in Use Stage.
	Data3.5: Input parameters in use stage for mortar
	Data3.5.1. Proportion of mortar utilization types
	Parameters	mortar utilization	distribution	a	b	max	min
	Proportion of mortar utilization types	Rendering, plastering and decorating	weibull	0.524	14	0.725	0.24
	Proportion of mortar utilization types	Masonry	weibull	0.188	12	0.522	0.017
	Proportion of mortar utilization types	Maintenance and repairing	weibull	0.332	10	0.599	0.133
						1.846	0.39
	Data3.5.2. Proportions of masonry wall with render
	Parameters	render types	distribution	Mode	lower	upper
	Proportions of masonry wall with render	both sides render	Triangular	0.6	0.4	0.9
	Proportions of masonry wall with render	one side render	Triangular	0.3	0.1	0.5
	Proportions of masonry wall with render	no render	Triangular	0.1	0	0.2
	Data3.5.3. Mortar thickness
	Parameters	mortar utilizaiton	distribution	a	b	max	min
	Mortar thickness (mm)	Rendering, plastering and decorating	weibull	22	4	3	50
	Mortar thickness (mm)	Masonry	weibull	11	8	5	20
	Mortar thickness (mm)	Maintenance and repairing	weibull	26.8	7	10	50
	Data3.5.4. Percentage of CaO converted to CaCO3 for mortar
	Parameters		distribution	a	b	max	min
	Percentage of CaO converted to CaCO3		weibull	0.914659	20	1	0.502
	Data3.5.5. Mortar carbonation rate coefficients
	Parameters		distribution	Mode	lower	upper
	Mortar carbonation rate coefficients (mm/(year)0.5)		Triangular	19.6	6.1	36.8

## Sheet: Data 4
	Data4: Input Parameters in End-of-life Stage.
	Data4.1: Exposure time in demolition stage
	Parameters	Distribution	a	b	max	min
	Exposure time in demolition stage (year)	Weibull	0.5	4	1	0.1
	Data4.2: Carbonation rate coefficients under buried conditions
	Parameters	concrete strength class	Distribution	lower	upper
	Carbonation rate coefficients (mm/(year)0.5)	<C15	uniform	2	4.9
	Carbonation rate coefficients (mm/(year)0.5)	C16-C23	uniform	1	2.4
	Carbonation rate coefficients (mm/(year)0.5)	C24-C35	uniform	0.8	1.4
	Carbonation rate coefficients (mm/(year)0.5)	>C35	uniform	0.5	0.9

## Sheet: Data 5.1
	Data5: Input Parameters in Disposal Stage.
	Data5.1: Distribution in different disposal types
	Disposal types	Countries and regions	distribution	Mode	lower	upper		Disposal types	Countries and regions	distribution	Mode	lower	upper		Disposal types	countries and regions	distribution	Mode	lower	upper
	RCA for new cement concrete	Australia	Triangular	0.02	0	0.025		RCA for Road base materials and others	Australia	Triangular	0.66	0.6	0.87		Landfill and Stacking	Australia	Triangular	0.32	0.1	0.4
	RCA for new cement concrete	Austria	Triangular	0.847149	0.691764	0.920487		RCA for Road base materials and others	Austria	Triangular	0.0617092	0	0.211578		Landfill and Stacking	Austria	Triangular	0.0911416	0.0628965	0.123641
	RCA for new cement concrete	Belarus	Triangular	0.0416438	0.0222723	0.07764		RCA for Road base materials and others	Belarus	Triangular	0.124931	0.0668168	0.23292		Landfill and Stacking	Belarus	Triangular	0.833425	0.68944	0.910911
	RCA for new cement concrete	Belgium	Triangular	0.591237	0.166115	0.993414		RCA for Road base materials and others	Belgium	Triangular	0.0651851	0	0.456296		Landfill and Stacking	Belgium	Triangular	0.343578	0.00554465	0.833885
	RCA for new cement concrete	Bulgaria	Triangular	0.668209	0.126699	0.960482		RCA for Road base materials and others	Bulgaria	Triangular	0.0002	0.0001	0.0003		Landfill and Stacking	Bulgaria	Triangular	0.331791	0.039518	0.873301
	RCA for new cement concrete	Canada	Triangular	0.642373	0.532034	0.744609		RCA for Road base materials and others	Canada	Triangular	0.147204	0.0809477	0.223625		Landfill and Stacking	Canada	Triangular	0.210424	0.174286	0.247352
	RCA for new cement concrete	Croatia	Triangular	0.566711	0.0236977	0.826536		RCA for Road base materials and others	Croatia	Triangular	0.0797002	0	0.295747		Landfill and Stacking	Croatia	Triangular	0.353589	0.111795	0.976302
	RCA for new cement concrete	Cyprus	Triangular	0.625998	0.380133	0.922603		RCA for Road base materials and others	Cyprus	Triangular	0.0256727	0	0.154036		Landfill and Stacking	Cyprus	Triangular	0.348329	0.0773972	0.619867
	RCA for new cement concrete	Czechia	Triangular	0.659737	0.58355	0.725866		RCA for Road base materials and others	Czechia	Triangular	0.258468	0.182944	0.315095		Landfill and Stacking	Czechia	Triangular	0.0817947	0.0423968	0.101355
	RCA for new cement concrete	Denmark	Triangular	0.672704	0.242477	0.962677		RCA for Road base materials and others	Denmark	Triangular	0.297879	0	0.748132		Landfill and Stacking	Denmark	Triangular	0.0294162	0.00650173	0.06288
	RCA for new cement concrete	Estonia	Triangular	0.666706	0.36555	0.870438		RCA for Road base materials and others	Estonia	Triangular	0.292213	0.0939487	0.561999		Landfill and Stacking	Estonia	Triangular	0.0410809	0.0249641	0.0724515
	RCA for new cement concrete	Finland	Triangular	0.667063	0.0548502	0.957479		RCA for Road base materials and others	Finland	Triangular	0.0224273	0	0.0977901		Landfill and Stacking	Finland	Triangular	0.310509	0.0425209	0.94515
	RCA for new cement concrete	France	Triangular	0.631303	0.583829	0.660871		RCA for Road base materials and others	France	Triangular	0.0973945	0.0660861	0.163116		Landfill and Stacking	France	Triangular	0.271303	0.17799	0.34
	RCA for new cement concrete	Germany	Triangular	0.856091	0.84791	0.873911		RCA for Road base materials and others	Germany	Triangular	0.0760847	0.0584368	0.0906257		Landfill and Stacking	Germany	Triangular	0.0678245	0.0502057	0.0775481
	RCA for new cement concrete	Greece	Triangular	0.412293	0	1		RCA for Road base materials and others	Greece	Triangular	0.138947	0	0.972029		Landfill and Stacking	Greece	Triangular	0.448759	0	0.999839
	RCA for new cement concrete	Hungary	Triangular	0.580557	0.100848	0.921308		RCA for Road base materials and others	Hungary	Triangular	0.300851	0.0676579	0.88305		Landfill and Stacking	Hungary	Triangular	0.118592	0.0110337	0.393014
	RCA for new cement concrete	Iceland	Triangular	0.198654	0	0.824945		RCA for Road base materials and others	Iceland	Triangular	0.754504	0.14557	1		Landfill and Stacking	Iceland	Triangular	0.0468422	0	0.252096
	RCA for new cement concrete	Ireland	Triangular	0.501214	0.268979	0.741394		RCA for Road base materials and others	Ireland	Triangular	0.480823	0.255348	0.727719		Landfill and Stacking	Ireland	Triangular	0.0179633	0.00263012	0.0482937
	RCA for new cement concrete	Italy	Triangular	0.968773	0.956476	0.978198		RCA for Road base materials and others	Italy	Triangular	0.00693874	0.00365751	0.0108328		Landfill and Stacking	Italy	Triangular	0.0242878	0.0138303	0.03343
	RCA for new cement concrete	Japan	Triangular	0.0471351	0.032672	0.0502613		RCA for Road base materials and others	Japan	Triangular	0.884833	0.613328	0.943518		Landfill and Stacking	Japan	Triangular	0.0680315	0.00622045	0.354
	RCA for new cement concrete	Kazakhstan	Triangular	0.075	0.05	0.1		RCA for Road base materials and others	Kazakhstan	Triangular	0.65	0.6	0.7		Landfill and Stacking	Kazakhstan	Triangular	0.275	0.25	0.3
	RCA for new cement concrete	Latvia	Triangular	0.881332	0.815864	0.956813		RCA for Road base materials and others	Latvia	Triangular	0.0670354	0	0.129907		Landfill and Stacking	Latvia	Triangular	0.0516323	0.00956771	0.0916149
	RCA for new cement concrete	Lithuania	Triangular	0.754827	0.705458	0.813132		RCA for Road base materials and others	Lithuania	Triangular	0.164666	0	0.260985		Landfill and Stacking	Lithuania	Triangular	0.0805062	0.0145218	0.268149
	RCA for new cement concrete	Luxembourg	Triangular	0.897525	0.70613	0.986632		RCA for Road base materials and others	Luxembourg	Triangular	0.0896977	0	0.290589		Landfill and Stacking	Luxembourg	Triangular	0.0127769	0.00328136	0.0199315
	RCA for new cement concrete	Netherlands	Triangular	0.997519	0.993963	0.999034		RCA for Road base materials and others	Netherlands	Triangular	0	0	0		Landfill and Stacking	Netherlands	Triangular	0.00248063	0.000966472	0.00603654
	RCA for new cement concrete	New Zealand	Triangular	0.02	0	0.025		RCA for Road base materials and others	New Zealand	Triangular	0.66	0.6	0.87		Landfill and Stacking	New Zealand	Triangular	0.32	0.1	0.4
	RCA for new cement concrete	Norway	Triangular	0.571877	0.375722	0.701521		RCA for Road base materials and others	Norway	Triangular	0.093647	0.0103858	0.221073		Landfill and Stacking	Norway	Triangular	0.334476	0.23309	0.557804
	RCA for new cement concrete	Poland	Triangular	0.589254	0.341467	0.774372		RCA for Road base materials and others	Poland	Triangular	0.287167	0.183732	0.493824		Landfill and Stacking	Poland	Triangular	0.123579	0.0418968	0.254785
	RCA for new cement concrete	Portugal	Triangular	0.438023	0.318996	0.594205		RCA for Road base materials and others	Portugal	Triangular	0.444782	0.101009	0.633703		Landfill and Stacking	Portugal	Triangular	0.117195	0.0284299	0.423553
	RCA for new cement concrete	Romania	Triangular	0.501829	0.306281	0.672608		RCA for Road base materials and others	Romania	Triangular	0.248385	0	0.445347		Landfill and Stacking	Romania	Triangular	0.249787	0.115348	0.529278
	RCA for new cement concrete	Russia	Triangular	0.075	0.05	0.1		RCA for Road base materials and others	Russia	Triangular	0.65	0.6	0.7		Landfill and Stacking	Russia	Triangular	0.275	0.25	0.3
	RCA for new cement concrete	Slovakia	Triangular	0.568372	0.370848	0.932603		RCA for Road base materials and others	Slovakia	Triangular	0.0245754	0	0.133233		Landfill and Stacking	Slovakia	Triangular	0.407053	0.0672429	0.613338
	RCA for new cement concrete	Slovenia	Triangular	0.922092	0.706393	0.984278		RCA for Road base materials and others	Slovenia	Triangular	0.0412223	0	0.263228		Landfill and Stacking	Slovenia	Triangular	0.036686	0.0157223	0.0745506
	RCA for new cement concrete	Spain	Triangular	0.654104	0.4108	0.717791		RCA for Road base materials and others	Spain	Triangular	0.0894378	0.00977023	0.2372		Landfill and Stacking	Spain	Triangular	0.256458	0.157092	0.352
	RCA for new cement concrete	Sweden	Triangular	0.687736	0.549662	0.830363		RCA for Road base materials and others	Sweden	Triangular	0.0800368	0	0.234643		Landfill and Stacking	Sweden	Triangular	0.232227	0.06399	0.449038
	RCA for new cement concrete	Switzerland	Triangular	0.856091	0.84791	0.873911		RCA for Road base materials and others	Switzerland	Triangular	0.0760847	0.0584368	0.0906257		Landfill and Stacking	Switzerland	Triangular	0.0678245	0.0502057	0.0775481
	RCA for new cement concrete	Turkey	Triangular	0.0951372	0.0339345	0.204537		RCA for Road base materials and others	Turkey	Triangular	0	0	0		Landfill and Stacking	Turkey	Triangular	0.904863	0.795463	0.966066
	RCA for new cement concrete	Ukraine	Triangular	0.589254	0.341467	0.774372		RCA for Road base materials and others	Ukraine	Triangular	0.287167	0.183732	0.493824		Landfill and Stacking	Ukraine	Triangular	0.123579	0.0418968	0.254785
	RCA for new cement concrete	United Kingdom	Triangular	0.943825	0.927144	0.968408		RCA for Road base materials and others	United Kingdom	Triangular	0.0182897	0.00730658	0.0337039		Landfill and Stacking	United Kingdom	Triangular	0.0378851	0.0242851	0.0427703
	RCA for new cement concrete	USA	Triangular	0.642373	0.532034	0.744609		RCA for Road base materials and others	USA	Triangular	0.147204	0.0809477	0.223625		Landfill and Stacking	USA	Triangular	0.210424	0.174286	0.247352
	RCA for new cement concrete	Mexico	Triangular	0.654104	0.4108	0.717791		RCA for Road base materials and others	Mexico	Triangular	0.0894378	0.00977023	0.2372		Landfill and Stacking	Mexico	Triangular	0.256458	0.157092	0.352
	RCA for new cement concrete	Brazil	Triangular	0.015	0.01	0.02		RCA for Road base materials and others	Brazil	Triangular	0.12	0.08	0.18		Landfill and Stacking	Brazil	Triangular	0.87	0.8	0.9
	RCA for new cement concrete	Egypt	Triangular	0.47	0.45	0.5		RCA for Road base materials and others	Egypt	Triangular	0.13	0.05	0.2		Landfill and Stacking	Egypt	Triangular	0.4	0.35	0.45
	RCA for new cement concrete	Iran	Triangular	0.0951372	0.0339345	0.204537		RCA for Road base materials and others	Iran	Triangular	0	0	0		Landfill and Stacking	Iran	Triangular	0.904863	0.795463	0.966066
	RCA for new cement concrete	Saudi Arabia	Triangular	0.47	0.45	0.5		RCA for Road base materials and others	Saudi Arabia	Triangular	0.13	0.05	0.2		Landfill and Stacking	Saudi Arabia	Triangular	0.4	0.35	0.45
	RCA for new cement concrete	India	Triangular	0	0	0		RCA for Road base materials and others	India	Triangular	0.005	0	0.01		Landfill and Stacking	India	Triangular	0.995	0.99	1
	RCA for new cement concrete	China	Triangular	0.0001	0	0.01		RCA for Road base materials and others	China	Triangular	0.023	0.02	0.05		Landfill and Stacking	China	Triangular	0.9769	0.8	0.98
	RCA for new cement concrete	South Korea	Triangular	0.144852	0.09375	0.19469		RCA for Road base materials and others	South Korea	Triangular	0.755421	0.707965	0.8125		Landfill and Stacking	South Korea	Triangular	0.0997264	0.09375	0.103448
	RCA for new cement concrete	Vietnam	Triangular	0	0	0		RCA for Road base materials and others	Vietnam	Triangular	0.015	0.01	0.02		Landfill and Stacking	Vietnam	Triangular	0.985	0.98	0.99
	RCA for new cement concrete	Indonesia	Triangular	0	0	0		RCA for Road base materials and others	Indonesia	Triangular	0.015	0.01	0.02		Landfill and Stacking	Indonesia	Triangular	0.985	0.98	0.99

[truncated: 1 more sheets: Data 5.2]
